# Supplementary material for: Density functional theory investigation on Pd-catalyzed cross-coupling of azoles with aryl thioethers
Source: Royal Society of Chemistry journal article supplement (doi:10.1039/c6ob00607h), 2016-01-01
Supplement: c6ob00607h1.pdf [file c6ob00607h1.pdf]

## Supporting Information

### Density Functional Theory Investigation on Pd-Catalyzed Cross-Coupling of Azoles with Aryl Thioethers

Yimeng Yang,<sup>a,b</sup> Zhimin Dang,<sup>b</sup> Haizhu Yu<sup>a,\*</sup>

<sup>a</sup> Department of Chemistry and Center for Atomic Engineering of Advanced Materials, Anhui University,  
Hefei, 230601

<sup>b</sup> Department of Polymer Science and Engineering, University of Science and Technology Beijing, Beijing  
100083, PR China.

E-mail: [yuhaizhu@ahu.edu.cn](mailto:yuhaizhu@ahu.edu.cn).

### Table of Contents

|                                                                                                                       |    |
|-----------------------------------------------------------------------------------------------------------------------|----|
| The detailed isomerization processes of reactant-catalyst complexes.....                                              | S2 |
| C-H Palladation steps of R1 through syn or anti attack.....                                                           | S2 |
| The NBO charge on transition states of C-H palladation.....                                                           | S3 |
| Bond dissociation enthalpies of C <sub>Ar</sub> -S/C <sub>alkyl</sub> -S bond in R2.....                              | S3 |
| The overall pathway of C-H/C <sub>alkyl</sub> -S activation between R1 and R2.....                                    | S3 |
| Thermal correction to Gibbs free energy (TCG), Zero-point correction and electronic energies (au) in DMF solvent..... | S4 |
| The explanation for Houk's distortion/interaction model .....                                                         | S4 |
| Cartesian coordinates of all complexes .....                                                                          | S5 |

## 1. The detailed isomerization processes of reactant-catalyst complexes

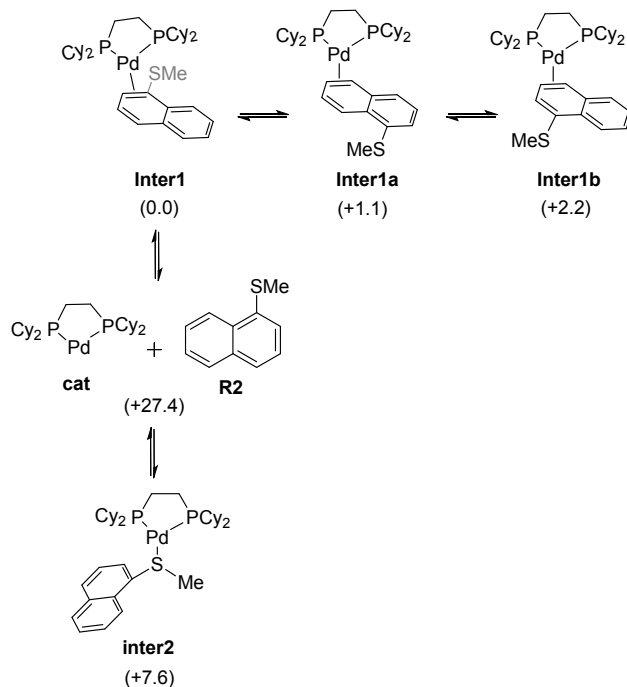

**Figure S1.** The isomerization processes among different types of reactant-catalyst complexes

## 2. C-H Palladation of R1 through syn or anti attack

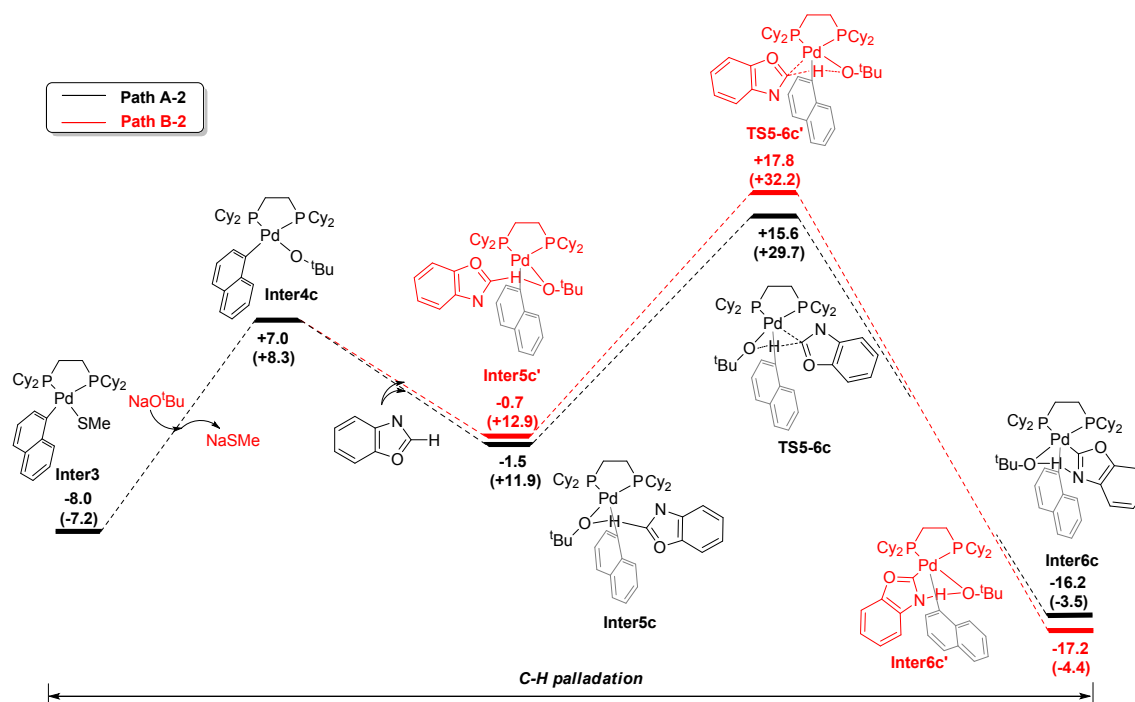

**Figure S2.** C-H palladation steps of R1-H through syn or anti attack.

### 3. The NBO charge on transition states of C-H palladation

|                | TS4-5a | TS4-5b |                              | TS5-6c | TS5-6d |
|----------------|--------|--------|------------------------------|--------|--------|
| Pd atom        | -0.17  | 0.02   | Pd atom                      | 0.01   | 0.19   |
| -SMe           | 0.09   | -0.13  | -O <sup>t</sup> Bu           | -0.51  | -0.57  |
| S atom of -SMe | 0.09   | -0.09  | O atom of -O <sup>t</sup> Bu | -0.87  | -0.89  |

### 4. Bond dissociation enthalpies of C<sub>Ar</sub>-S/C<sub>alkyl</sub>-S bond in R2

| Compounds                                                                         | TCE      | E           | Compounds                                                                         | TCE      | E            | BDE (kcal/mol) |
|-----------------------------------------------------------------------------------|----------|-------------|-----------------------------------------------------------------------------------|----------|--------------|----------------|
| 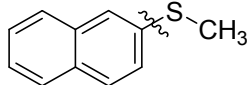 | 0.187968 | -823.155289 |  | 0.142585 | -384.9950854 | 80.0           |
|                                                                                   |          |             | •SMe                                                                              | 0.039962 | -438.0272914 |                |
|  | 0.187968 | -823.155289 |  | 0.146845 | -783.2411199 | 61.9           |
|                                                                                   |          |             | •CH <sub>3</sub>                                                                  | 0.033882 | -39.80829566 |                |

### 5. The overall pathway of C-H/C<sub>alkyl</sub>-S activation between R1 and R2

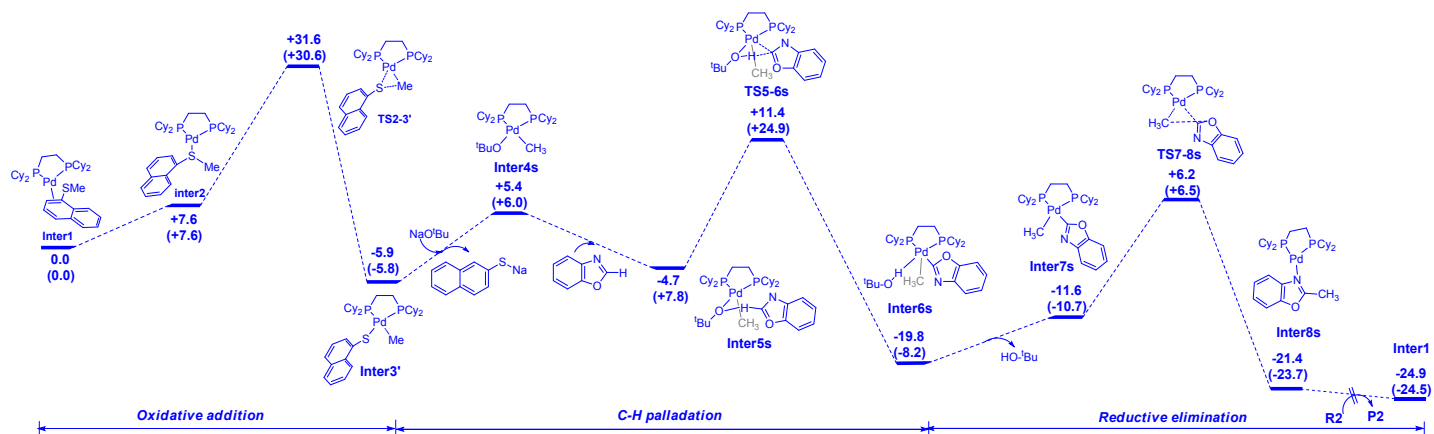

Figure S3. The overall pathway of C-H/C<sub>alkyl</sub>-S activation between R1 and R2

## 6. Thermal correction to Gibbs free energy (TCG) /Zero-point correction and electronic energies (au) in toluene solvent

| Compounds       | TCG      | Zero-point correction | E            | Compounds                | TCG      | Zero-point correction | E            |
|-----------------|----------|-----------------------|--------------|--------------------------|----------|-----------------------|--------------|
| <b>R1</b>       | 0.076137 | 0.106159              | -399.5560384 | <b>TS5-6d</b>            | 0.977661 | 1.072385              | -2846.269999 |
| <b>R2</b>       | 0.140575 | 0.176905              | -823.155289  | <b>TS5-6s</b>            | 0.891473 | 0.976208              | -2501.104157 |
| <b>cat</b>      | 0.642286 | 0.706735              | -1828.684972 | <b>Inter6c</b>           | 0.984959 | 1.078747              | -2846.36042  |
| <b>Inter1</b>   | 0.803945 | 0.883384              | -2651.883644 | <b>Inter6c'</b>          | 0.985432 | 1.079090              | -2846.362322 |
| <b>Inter1a</b>  | 0.803565 | 0.884093              | -2651.882495 | <b>Inter6d</b>           | 0.984055 | 1.078894              | -2846.322362 |
| <b>Inter1b</b>  | 0.803192 | 0.883776              | -2651.880524 | <b>Inter6s</b>           | 0.889658 | 0.977519              | -2501.155129 |
| <b>Inter2</b>   | 0.804010 | 0.884568              | -2651.872649 | <b>TS6-7</b>             | 0.987486 | 1.078201              | -2846.336218 |
| <b>TS2-3</b>    | 0.803925 | 0.882969              | -2651.859267 | <b>Inter7</b>            | 0.858624 | 0.941187              | -2612.763292 |
| <b>TS2-3'</b>   | 0.800658 | 0.881677              | -2651.831550 | <b>Inter7'</b>           | 0.985939 | 1.079453              | -2846.385422 |
| <b>Inter3</b>   | 0.806583 | 0.884855              | -2651.897719 | <b>Inter7s</b>           | 0.764101 | 0.839917              | -2267.555054 |
| <b>Inter3'</b>  | 0.804943 | 0.884227              | -2651.893830 | <b>TS7-8</b>             | 0.855427 | 0.938815              | -2612.740025 |
| <b>Inter4a</b>  | 0.901527 | 0.992592              | -3051.464121 | <b>TS7-8s</b>            | 0.761515 | 0.838260              | -2267.525103 |
| <b>Inter4b</b>  | 0.901992 | 0.991970              | -3051.434768 | <b>Inter8</b>            | 0.859290 | 0.941566              | -2612.790632 |
| <b>Inter4c</b>  | 0.889193 | 0.971165              | -2446.765942 | <b>Inter8s</b>           | 0.759535 | 0.840500              | -2267.571301 |
| <b>Inter4s</b>  | 0.794897 | 0.870144              | -2101.557696 | <b>P1</b>                | 0.193099 | 0.234066              | -784.0513046 |
| <b>TS4-5a</b>   | 0.899293 | 0.987832              | -3051.392506 | <b>P2</b>                | 0.101500 | 0.133779              | -438.8605625 |
| <b>TS4-5b</b>   | 0.894248 | 0.984601              | -3051.379847 | <b>NaSMe</b>             | 0.009431 | 0.038255              | -600.4023693 |
| <b>Inter5c</b>  | 0.987025 | 1.079612              | -2846.337887 | <b>NaSnaph</b>           | 0.101919 | 0.138538              | -945.6123676 |
| <b>Inter5c'</b> | 0.987522 | 1.079943              | -2846.336825 | <b>NaO<sup>t</sup>Bu</b> | 0.091135 | 0.124519              | -395.2943828 |
| <b>Inter5a</b>  | 0.898053 | 0.988888              | -3051.442644 | <b>HSMe</b>              | 0.022202 | 0.046421              | -233.5855521 |
| <b>Inter5b</b>  | 0.898339 | 0.988698              | -3051.411673 | <b>HO<sup>t</sup>Bu</b>  | 0.107168 | 0.136173              | -233.5855521 |
| <b>Inter5d</b>  | 0.985008 | 1.078524              | -2846.310192 | <b>cat_dist</b>          | -        | -                     | -1828.681764 |
| <b>Inter5s</b>  | 0.891613 | 0.978012              | -2501.131587 | <b>cat_dist</b>          | -        | -                     | -1828.679356 |
| <b>TS5-6c</b>   | 0.985533 | 1.077105              | -2846.308082 | <b>sub_dist</b>          | -        | -                     | -823.1101489 |
| <b>TS5-6c'</b>  | 0.985491 | 1.076486              | -2846.303949 | <b>sub_dist</b>          | -        | -                     | -823.1134542 |

## 7. The explanation for Houk's distortion/interaction model

According to Houk's distortion/interaction model, the activation barrier is the sum of interaction energy and the distortion energy. The distortion energy is calculated from the distorted structural moieties with the free structures. For example, **TS2-3** can be formally divided into two fragments (i.e. cat: (dcype) Pd and sub: thioether). The single-point energy of the (dcype)Pd and the thioether moiety in **TS2-3** are named as  $E_{\text{cat}}$  and  $E_{\text{sub}}$ , respectively. The relative energy of the free (dcype)Pd and the thioether (after optimization) is named as  $E_{\text{cat-opt}}$  and  $E_{\text{sub-opt}}$ , respectively. Therefore, the energy difference between the free structure and the distorted structure in transition state (i.e.  $E_{\text{cat}} - E_{\text{cat-opt}}$ ;  $E_{\text{sub}} - E_{\text{sub-opt}}$ ) corresponds to the distortion energies of cat and sub, respectively. For clarity reasons, they are named as  $E_{\text{dist\_cat}}$  and  $E_{\text{dist\_sub}}$  (Scheme 5). Meanwhile, the interaction energy ( $E_{\text{int}}$ ) for each transition state equals to the  $E_{\text{TS}} - E_{\text{dis\_sub}} - E_{\text{dis\_cat}}$ , and  $E_{\text{TS}}$  is the electronic energy of the transition state.

## Cartesian coordinates of all complexes.

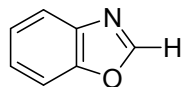

**R1**

|   |             |             |             |
|---|-------------|-------------|-------------|
| H | -3.36103500 | -0.04570200 | -0.00005600 |
| C | -2.28585600 | 0.06797900  | -0.00007700 |
| O | -1.56804000 | -1.09938700 | 0.00000600  |
| N | -1.60712600 | 1.16402900  | -0.00002200 |
| C | -0.26000800 | -0.67192700 | 0.00009000  |
| C | -0.27580900 | 0.72916200  | 0.00010100  |
| C | 0.89983300  | -1.43289900 | -0.00003300 |
| C | 0.92719100  | 1.43977900  | -0.00002600 |
| C | 2.09474900  | -0.71009500 | -0.00002200 |
| H | 0.87818100  | -2.51738100 | 0.00006600  |
| C | 2.10738500  | 0.69777500  | -0.00001700 |
| H | 0.93181600  | 2.52494500  | 0.00015500  |
| H | 3.03790600  | -1.24886300 | -0.00003000 |
| H | 3.06242700  | 1.21524400  | -0.00013300 |

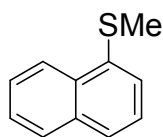

**R2**

|   |             |             |             |
|---|-------------|-------------|-------------|
| S | 2.12047100  | -1.17245500 | -0.00009700 |
| C | 0.91414100  | 0.14731200  | -0.00013200 |
| C | -0.47434700 | -0.22843700 | -0.00007100 |
| C | 1.26161300  | 1.48538800  | -0.00005300 |
| C | -0.91403700 | -1.57985900 | 0.00001000  |
| C | -1.46660600 | 0.80788600  | -0.00001100 |
| C | 0.27035900  | 2.49526200  | 0.00000600  |
| H | 2.30238300  | 1.78761400  | -0.00001500 |
| C | -2.25529400 | -1.89494300 | 0.00004800  |
| H | -0.18197500 | -2.38138900 | 0.00001700  |
| C | -2.84068700 | 0.44690300  | 0.00003900  |
| C | -1.06341000 | 2.17007900  | -0.00000500 |
| H | 0.58198500  | 3.53643400  | 0.00008500  |
| C | -3.23137600 | -0.87234100 | 0.00004900  |
| H | -2.56497300 | -2.93646100 | 0.00009500  |
| H | -3.58323100 | 1.24148300  | 0.00007200  |
| H | -1.82610800 | 2.94452000  | 0.00003000  |
| H | -4.28678000 | -1.13106500 | 0.00007000  |
| C | 3.71345300  | -0.29016300 | 0.00019600  |
| H | 4.47733600  | -1.07176300 | 0.00008900  |
| H | 3.83552700  | 0.32387200  | -0.89622700 |
| H | 3.83544500  | 0.32351300  | 0.89688100  |

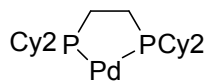

**cat**

|    |             |             |             |
|----|-------------|-------------|-------------|
| Pd | -0.00382500 | -0.31922400 | -1.57910700 |
| P  | 1.77540500  | -0.17479600 | -0.09942900 |
| P  | -1.73442700 | 0.08981000  | -0.08996700 |
| C  | 0.77398600  | 0.43787800  | 1.39223800  |
| C  | -0.69062300 | -0.05759600 | 1.48844300  |
| C  | 2.72900900  | -1.64837800 | 0.60598400  |
| C  | 1.77493100  | -2.74131100 | 1.13105600  |
| C  | 2.53655200  | -3.97811300 | 1.64000600  |
| C  | 3.47542800  | -4.54980100 | 0.56925200  |
| C  | 4.43783100  | -3.47124400 | 0.05363200  |

|   |             |             |             |
|---|-------------|-------------|-------------|
| C | 3.67684400  | -2.23718400 | -0.46067100 |
| C | 3.13129700  | 1.14621600  | -0.20754500 |
| C | 2.62668200  | 2.38588800  | -0.97517900 |
| C | 3.75217100  | 3.40788100  | -1.20749000 |
| C | 4.42978500  | 3.81825800  | 0.10812100  |
| C | 4.93011400  | 2.58901600  | 0.88041200  |
| C | 3.80235800  | 1.56746300  | 1.11681600  |
| C | -3.12339700 | -1.13334300 | 0.31477600  |
| C | -2.61410900 | -2.58577500 | 0.18928700  |
| C | -3.72390000 | -3.61483600 | 0.46387000  |
| C | -4.93381300 | -3.39747700 | -0.45484700 |
| C | -5.45254000 | -1.95761000 | -0.34570000 |
| C | -4.34115600 | -0.92683700 | -0.61063500 |
| C | -2.59658700 | 1.76857400  | 0.09174600  |
| C | -1.61628100 | 2.93369200  | -0.15906500 |
| C | -2.34842100 | 4.28574600  | -0.20287300 |
| C | -3.16321000 | 4.52951700  | 1.07628700  |
| C | -4.12732500 | 3.36684500  | 1.35194300  |
| C | -3.39261200 | 2.01331000  | 1.39015000  |
| H | 1.29540500  | 0.19492300  | 2.32834200  |
| H | 0.77831800  | 1.53076700  | 1.31276800  |
| H | -1.18335000 | 0.45277900  | 2.32644400  |
| H | -0.69475600 | -1.12383900 | 1.73711100  |
| H | 3.33409500  | -1.29230500 | 1.45388900  |
| H | 1.09158800  | -3.03788500 | 0.32220600  |
| H | 1.15072100  | -2.34473100 | 1.94077100  |
| H | 1.82122400  | -4.74290800 | 1.96976000  |
| H | 3.12681800  | -3.69987600 | 2.52600000  |
| H | 2.87741800  | -4.93279200 | -0.27084000 |
| H | 4.03632800  | -5.40388100 | 0.97019500  |
| H | 5.07210900  | -3.87459500 | -0.74640600 |
| H | 5.11457300  | -3.17013400 | 0.86729300  |
| H | 3.08270900  | -2.51748200 | -1.34235000 |
| H | 4.39538000  | -1.48051000 | -0.79908400 |
| H | 3.89886000  | 0.67153000  | -0.83745300 |
| H | 1.81665800  | 2.86791500  | -0.40806400 |
| H | 2.18929500  | 2.07414000  | -1.93120000 |
| H | 3.35324100  | 4.29128900  | -1.72281500 |
| H | 4.50391900  | 2.96775600  | -1.87955700 |
| H | 3.70801100  | 4.36755900  | 0.73123500  |
| H | 5.26051300  | 4.50824800  | -0.08850400 |
| H | 5.36535400  | 2.89237000  | 1.84179800  |
| H | 5.73832500  | 2.10735600  | 0.31019700  |
| H | 3.05169300  | 2.01549500  | 1.78269300  |
| H | 4.20637000  | 0.69477600  | 1.64457300  |
| H | -3.44196500 | -0.96653100 | 1.35542100  |
| H | -1.77486000 | -2.76415500 | 0.87199800  |
| H | -2.22038800 | -2.73215700 | -0.82683800 |
| H | -4.04550100 | -3.53379400 | 1.51307600  |
| H | -3.32574100 | -4.63011600 | 0.33766500  |
| H | -5.73247700 | -4.11046500 | -0.21255900 |
| H | -4.63835000 | -3.59842600 | -1.49523100 |
| H | -5.86196100 | -1.79589900 | 0.66276800  |
| H | -6.28116300 | -1.79530700 | -1.04737600 |
| H | -4.75212200 | 0.08236400  | -0.49289600 |
| H | -4.00857100 | -1.00875800 | -1.65616700 |
| H | -3.31060100 | 1.77089700  | -0.74537000 |
| H | -1.06437400 | 2.76463900  | -1.09136400 |
| H | -0.86935200 | 2.96243400  | 0.64757400  |
| H | -3.02289400 | 4.30041800  | -1.07182300 |
| H | -1.62570000 | 5.09796900  | -0.35533800 |
| H | -3.71735800 | 5.47412800  | 1.00255300  |
| H | -2.47472900 | 4.63710300  | 1.92801700  |
| H | -4.89430700 | 3.33685300  | 0.56387600  |
| H | -4.65985100 | 3.52861500  | 2.29844800  |
| H | -4.11803900 | 1.20980100  | 1.56491300  |
| H | -2.70731800 | 2.00884000  | 2.24942500  |

## H-O<sup>t</sup>Bu

|   |             |             |             |
|---|-------------|-------------|-------------|
| O | 0.01398900  | -0.00020900 | 1.45238900  |
| C | -0.00541200 | -0.00006600 | 0.01378500  |
| C | 0.69588200  | -1.26250900 | -0.51027400 |

|   |             |             |             |
|---|-------------|-------------|-------------|
| H | 0.21909800  | -2.15865300 | -0.09974700 |
| H | 0.65939900  | -1.31855500 | -1.60452900 |
| H | 1.75323100  | -1.27210100 | -0.21349300 |
| C | 0.68508400  | 1.26851200  | -0.50984200 |
| H | 0.64865500  | 1.32430000  | -1.60411400 |
| H | 0.20015300  | 2.16039500  | -0.09954500 |
| H | 1.74212700  | 1.28748700  | -0.21242300 |
| C | -1.49044700 | -0.00617900 | -0.35692700 |
| H | -1.98738700 | 0.87786000  | 0.05589400  |
| H | -1.62262000 | -0.00594700 | -1.44417400 |
| H | -1.98000100 | -0.89497900 | 0.05451700  |
| H | 0.94479300  | 0.00331700  | 1.72804700  |

### Na-O<sup>t</sup>Bu

|    |             |             |             |
|----|-------------|-------------|-------------|
| Na | 2.69755300  | -0.00014900 | -0.00025000 |
| O  | 0.75939100  | 0.00003700  | 0.00003000  |
| C  | -0.61950500 | 0.00016500  | 0.00023900  |
| C  | -1.14716900 | -1.13382000 | 0.91236300  |
| H  | -0.77831700 | -0.98686300 | 1.93520400  |
| H  | -2.24443300 | -1.18197600 | 0.94491400  |
| H  | -0.77046900 | -2.09991100 | 0.55362500  |
| C  | -1.14767000 | -0.22327500 | -1.43766300 |
| H  | -2.24494500 | -0.23235400 | -1.49472900 |
| H  | -0.77540000 | 0.57251200  | -2.09502800 |
| H  | -0.77516600 | -1.18052500 | -1.82360700 |
| C  | -1.14694500 | 1.35717900  | 0.52564200  |
| H  | -0.77304800 | 2.16920900  | -0.11053700 |
| H  | -2.24417900 | 1.41185200  | 0.54570700  |
| H  | -0.77453200 | 1.52790500  | 1.54346600  |

### Na-SMe

|    |             |             |             |
|----|-------------|-------------|-------------|
| Na | -1.91325000 | 0.35066800  | 0.00000000  |
| S  | 0.35898600  | -0.67875400 | 0.00000000  |
| C  | 1.60745200  | 0.68766700  | 0.00000000  |
| H  | 1.52628200  | 1.31960900  | 0.89040700  |
| H  | 2.60491300  | 0.23726900  | -0.00017700 |
| H  | 1.52607500  | 1.31983300  | -0.89022800 |

### H-SMe

|   |             |             |             |
|---|-------------|-------------|-------------|
| S | -0.66760900 | -0.08719500 | -0.00002600 |
| C | 1.16468100  | 0.01959100  | 0.00003200  |
| H | 1.53627400  | 0.52269700  | 0.89569200  |
| H | 1.53028200  | -1.00998900 | -0.00010600 |
| H | 1.53631800  | 0.52295400  | -0.89546500 |
| H | -0.90921400 | 1.24190400  | 0.00011000  |

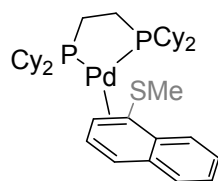

### Inter1

|   |             |             |             |
|---|-------------|-------------|-------------|
| P | -2.15328400 | -0.37773300 | 0.49385000  |
| P | 0.85330000  | 0.95546700  | 1.18072000  |
| C | -1.85994200 | 0.54540200  | 2.11621800  |
| C | -3.78681600 | 0.37254600  | -0.09068800 |
| C | -2.67328600 | -2.09643000 | 1.07848300  |
| C | -0.38450500 | 0.62019000  | 2.56700900  |
| C | 2.44201100  | 0.21018300  | 1.87736100  |
| C | 1.15935800  | 2.81202100  | 1.31876100  |
| H | -2.24039200 | 1.56016900  | 1.95383000  |
| H | -2.46818200 | 0.11196100  | 2.92077200  |
| C | -3.56217900 | 1.77786600  | -0.68738200 |
| C | -4.94153700 | 0.39240200  | 0.93271700  |
| H | -4.08498200 | -0.28005200 | -0.92464300 |
| C | -3.24946000 | -2.93363000 | -0.08386300 |

|   |             |             |             |
|---|-------------|-------------|-------------|
| C | -1.48647100 | -2.83692100 | 1.73132500  |
| H | -3.45849900 | -1.97154900 | 1.83972500  |
| H | -0.28324700 | 1.36609200  | 3.36620300  |
| H | -0.08989300 | -0.34036600 | 3.00345400  |
| C | 2.39193200  | -1.33284400 | 1.83217700  |
| C | 2.86657200  | 0.70216600  | 3.27620900  |
| H | 3.21098600  | 0.51903000  | 1.15452600  |
| C | 2.34207100  | 3.24338500  | 0.42459800  |
| C | -0.10946700 | 3.61471800  | 0.96218300  |
| H | 1.41363700  | 3.03664000  | 2.36553100  |
| C | -4.85373500 | 2.34970700  | -1.29647700 |
| H | -2.76965900 | 1.73259400  | -1.44359400 |
| H | -3.20686200 | 2.46295600  | 0.09626800  |
| C | -6.23125500 | 0.96880600  | 0.31929300  |
| H | -5.13884100 | -0.61645100 | 1.31512800  |
| H | -4.65443500 | 1.00519700  | 1.79928700  |
| C | -3.63174500 | -4.35425000 | 0.36555400  |
| H | -2.49864100 | -2.99564400 | -0.88394200 |
| H | -4.12966000 | -2.44210300 | -0.51543900 |
| C | -1.86685000 | -4.26086500 | 2.17276000  |
| H | -0.65575000 | -2.88142900 | 1.01356300  |
| H | -1.12075100 | -2.27581400 | 2.59982300  |
| C | 3.72838200  | -1.95369400 | 2.27404700  |
| H | 2.13671000  | -1.66629100 | 0.82074700  |
| H | 1.59605600  | -1.69919000 | 2.49727200  |
| C | 4.20206800  | 0.07364300  | 3.71558600  |
| H | 2.95714700  | 1.79488000  | 3.29533900  |
| H | 2.08979400  | 0.43887000  | 4.00865100  |
| C | 2.57726600  | 4.76300200  | 0.47528300  |
| H | 2.14358600  | 2.93586400  | -0.61184200 |
| H | 3.25958000  | 2.72633800  | 0.73019500  |
| C | 0.13488700  | 5.13282700  | 1.01388400  |
| H | -0.44130000 | 3.33225200  | -0.04692300 |
| H | -0.92808600 | 3.35544200  | 1.64500800  |
| C | -6.00268600 | 2.36449200  | -0.27787800 |
| H | -5.14523200 | 1.73738600  | -2.16285200 |
| H | -4.66872400 | 3.36203900  | -1.67845900 |
| H | -6.58766800 | 0.29105400  | -0.47060800 |
| H | -7.02189500 | 1.00299600  | 1.08017300  |
| C | -2.44500700 | -5.08111800 | 1.01127700  |
| H | -4.00869100 | -4.92435700 | -0.49339400 |
| H | -4.45881400 | -4.29590600 | 1.08901000  |
| H | -0.98700700 | -4.76294700 | 2.59538800  |
| H | -2.61195800 | -4.20293900 | 2.98054100  |
| C | 4.15318500  | -1.45985300 | 3.66411900  |
| H | 4.50174500  | -1.69493900 | 1.53740400  |
| H | 3.64686200  | -3.04820300 | 2.26562600  |
| H | 5.00186500  | 0.43254600  | 3.05115100  |
| H | 4.45879000  | 0.41632800  | 4.72667300  |
| C | 1.30793100  | 5.54687800  | 0.11515200  |
| H | 3.39725300  | 5.03116200  | -0.20306000 |
| H | 2.90286700  | 5.04789100  | 1.48713800  |
| H | -0.77974800 | 5.66492100  | 0.72122200  |
| H | 0.35078000  | 5.42985800  | 2.05108200  |
| H | -6.92394500 | 2.73301000  | -0.74684500 |
| H | -5.76042400 | 3.06953800  | 0.53159000  |
| H | -1.66247300 | -5.24120100 | 0.25505000  |
| H | -2.75074600 | -6.07529900 | 1.36169300  |
| H | 5.12968700  | -1.87992500 | 3.93777200  |
| H | 3.43524400  | -1.82383100 | 4.41483400  |
| H | 1.04692700  | 5.35019800  | -0.93512700 |
| H | 1.48850900  | 6.62640000  | 0.19688700  |
| C | 1.20893100  | -0.23295700 | -2.57976600 |
| C | 2.39399100  | -1.04088000 | -2.26624300 |
| C | -0.03508900 | -0.89722200 | -2.82174800 |
| C | 3.66813800  | -0.47192500 | -2.04174200 |
| C | 2.26973000  | -2.46518500 | -2.19985700 |
| C | -0.09655200 | -2.33527100 | -2.76252800 |
| H | -0.81785100 | -0.38847700 | -3.37679300 |
| C | 4.77261100  | -1.25920100 | -1.75098800 |
| H | 3.77747300  | 0.60731300  | -2.08453700 |
| C | 3.41102800  | -3.24174800 | -1.89763700 |
| C | 0.99961300  | -3.08698500 | -2.46145200 |
| H | -1.04415000 | -2.81677200 | -2.99537600 |
| C | 4.64674000  | -2.65733900 | -1.67662400 |

|    |             |             |             |
|----|-------------|-------------|-------------|
| H  | 5.73852800  | -0.78983600 | -1.58169800 |
| H  | 3.30200600  | -4.32340100 | -1.84955400 |
| H  | 0.93918600  | -4.17245400 | -2.43465300 |
| H  | 5.51262800  | -3.27463300 | -1.45199900 |
| Pd | -0.12176700 | -0.05657900 | -0.77008400 |
| S  | 1.58154100  | 1.36402800  | -3.36746700 |
| C  | -0.00873500 | 2.25168100  | -3.30480900 |
| H  | 0.19547300  | 3.26301400  | -3.66949500 |
| H  | -0.76331400 | 1.79476500  | -3.95182100 |
| H  | -0.38190400 | 2.29592900  | -2.27699200 |

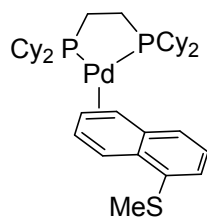

**Inter1a**

|   |             |             |             |
|---|-------------|-------------|-------------|
| P | -0.30806400 | 1.70292900  | 0.78565000  |
| P | -2.10242300 | -1.10055400 | 0.37723100  |
| C | -1.39556300 | 1.05060800  | 2.18441400  |
| C | 1.33619300  | 2.01890700  | 1.65379200  |
| C | -0.98827100 | 3.44024400  | 0.49636300  |
| C | -2.55875000 | 0.14486700  | 1.72252900  |
| C | -3.77570200 | -1.42923600 | -0.43955800 |
| C | -1.79775500 | -2.68810600 | 1.35159100  |
| H | -0.72817400 | 0.47819000  | 2.83801600  |
| H | -1.78970700 | 1.87762600  | 2.78935700  |
| C | 2.07786900  | 0.68597900  | 1.89388400  |
| C | 1.29215100  | 2.86109600  | 2.94484500  |
| H | 1.92004900  | 2.57152000  | 0.90290200  |
| C | -0.08575200 | 4.22818400  | -0.47730800 |
| C | -2.43449900 | 3.38189900  | -0.03952100 |
| H | -1.00617800 | 3.97050500  | 1.46104700  |
| H | -2.99643200 | -0.36469500 | 2.59100100  |
| H | -3.35388800 | 0.76545300  | 1.29473300  |
| C | -4.16143900 | -0.26819100 | -1.38112000 |
| C | -4.95012700 | -1.77980200 | 0.49742100  |
| H | -3.58048700 | -2.30423200 | -1.07790400 |
| C | -1.53563700 | -3.87133600 | 0.39483900  |
| C | -0.62035900 | -2.52453800 | 2.33628100  |
| H | -2.70054900 | -2.90805600 | 1.94145800  |
| C | 3.48549100  | 0.91848200  | 2.46697800  |
| H | 2.13801800  | 0.12321100  | 0.95635500  |
| H | 1.50568900  | 0.06535100  | 2.59939600  |
| C | 2.70386800  | 3.08694200  | 3.51899300  |
| H | 0.81349000  | 3.83078300  | 2.76117700  |
| H | 0.67948400  | 2.34606300  | 3.69878700  |
| C | -0.65077600 | 5.62366800  | -0.79328600 |
| H | 0.01360100  | 3.65570200  | -1.41090700 |
| H | 0.92541600  | 4.32875100  | -0.06522700 |
| C | -2.99288900 | 4.77923400  | -0.35968700 |
| H | -2.45402300 | 2.76192400  | -0.94716900 |
| H | -3.08978500 | 2.89063400  | 0.69000500  |
| C | -5.44302400 | -0.58259500 | -2.17124300 |
| H | -3.33038100 | -0.05406300 | -2.06376200 |
| H | -4.32373400 | 0.64700600  | -0.79272600 |
| C | -6.23389500 | -2.08983000 | -0.29494500 |
| H | -4.69889400 | -2.63797200 | 1.13208200  |
| H | -5.14562800 | -0.93603500 | 1.17435000  |
| C | -1.23257600 | -5.17337400 | 1.15584700  |
| H | -0.68313500 | -3.61992900 | -0.25098200 |
| H | -2.39576800 | -4.02863300 | -0.26775600 |
| C | -0.31517200 | -3.83043500 | 3.09069200  |
| H | 0.27241200  | -2.20330300 | 1.78196100  |
| H | -0.84255000 | -1.73342200 | 3.06254600  |
| C | 3.44286700  | 1.76067600  | 3.74971600  |
| H | 4.09803700  | 1.42900600  | 1.71038800  |
| H | 3.97011800  | -0.04715700 | 2.65917800  |
| H | 3.28203800  | 3.70485700  | 2.81603900  |
| H | 2.63758000  | 3.65772800  | 4.45469000  |

|    |             |             |             |
|----|-------------|-------------|-------------|
| C  | -2.08517100 | 5.54377100  | -1.33255800 |
| H  | 0.00217700  | 6.13170400  | -1.51469100 |
| H  | -0.64125000 | 6.23536300  | 0.12121600  |
| H  | -4.00539900 | 4.68593300  | -0.77361600 |
| H  | -3.08920100 | 5.35475100  | 0.57325400  |
| C  | -6.61030500 | -0.93947100 | -1.23959700 |
| H  | -5.24940700 | -1.42620600 | -2.85045000 |
| H  | -5.70901500 | 0.27297800  | -2.80551300 |
| H  | -6.08061600 | -3.00654300 | -0.88342100 |
| H  | -7.05772000 | -2.29992700 | 0.39972600  |
| C  | -0.05752400 | -4.99676200 | 2.12691400  |
| H  | -1.01987600 | -5.97806200 | 0.44024700  |
| H  | -2.12589400 | -5.48366100 | 1.71854200  |
| H  | 0.54876800  | -3.68134800 | 3.75116600  |
| H  | -1.16718500 | -4.08024700 | 3.74077000  |
| H  | 4.45944600  | 1.95278400  | 4.11687000  |
| H  | 2.92789300  | 1.19318900  | 4.53966900  |
| H  | -2.07877100 | 5.02771800  | -2.30410600 |
| H  | -2.48234700 | 6.55058000  | -1.51459700 |
| H  | -7.50012200 | -1.20358100 | -1.82536900 |
| H  | -6.88001800 | -0.05522100 | -0.64273900 |
| H  | 0.85963700  | -4.79753800 | 1.55384600  |
| H  | 0.11722800  | -5.92350100 | 2.68841400  |
| C  | 4.48930200  | -0.94031700 | -1.43628800 |
| C  | 3.12395400  | -0.98685500 | -1.85547800 |
| C  | 5.16412700  | 0.27441700  | -1.37959700 |
| C  | 2.39018800  | -2.21821400 | -1.99417500 |
| C  | 2.46546600  | 0.23878500  | -2.18290300 |
| C  | 4.51145600  | 1.46751500  | -1.73949400 |
| H  | 6.19962600  | 0.32070700  | -1.06344300 |
| C  | 1.09488500  | -2.23150000 | -2.42900700 |
| H  | 2.88924000  | -3.15857200 | -1.78257800 |
| C  | 1.07167500  | 0.21999800  | -2.58804200 |
| C  | 3.18690300  | 1.45148300  | -2.13317800 |
| H  | 5.06137500  | 2.40479500  | -1.70370900 |
| C  | 0.38740800  | -1.01780800 | -2.73693900 |
| H  | 0.58357000  | -3.18146300 | -2.56834400 |
| H  | 0.69806700  | 1.10696400  | -3.09499000 |
| H  | 2.68000200  | 2.37541200  | -2.40240000 |
| H  | -0.50787800 | -1.07852800 | -3.35034200 |
| Pd | -0.35928600 | -0.02825100 | -0.87509000 |
| S  | 5.26655300  | -2.49224300 | -0.98787800 |
| C  | 6.99871500  | -2.02510600 | -0.67510600 |
| H  | 7.51518300  | -2.96026800 | -0.44292500 |
| H  | 7.45961000  | -1.57525600 | -1.55897000 |
| H  | 7.09187400  | -1.34962700 | 0.18000400  |

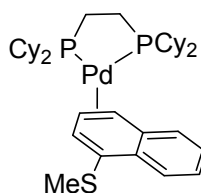

**Inter1b**

|   |             |             |             |
|---|-------------|-------------|-------------|
| P | 1.98831300  | -0.82207000 | 0.42993500  |
| P | 0.00393300  | 1.85698500  | 0.78639600  |
| C | 2.10877900  | 0.25036100  | 1.97895700  |
| C | 1.96838100  | -2.56219800 | 1.16561400  |
| C | 3.72307700  | -0.70897200 | -0.30772200 |
| C | 1.58248000  | 1.69222300  | 1.81321700  |
| C | 0.12153400  | 3.64137800  | 0.17822900  |
| C | -1.35273000 | 1.94563100  | 2.09555800  |
| H | 1.51675900  | -0.26503100 | 2.74345900  |
| H | 3.14056300  | 0.27589900  | 2.35292300  |
| C | 0.57523100  | -2.88838500 | 1.74557700  |
| C | 3.07506400  | -2.89264200 | 2.18882800  |
| H | 2.10810400  | -3.21493300 | 0.29106600  |
| C | 3.87841000  | -1.68030700 | -1.49733900 |
| C | 4.05674400  | 0.73202700  | -0.74853400 |
| H | 4.44251700  | -0.99727600 | 0.47361900  |
| H | 1.44668400  | 2.15060200  | 2.80108400  |

|   |             |             |             |
|---|-------------|-------------|-------------|
| H | 2.33615200  | 2.29416900  | 1.29375800  |
| C | 1.13801200  | 3.76641900  | -0.97661700 |
| C | 0.38238000  | 4.71756700  | 1.25231700  |
| H | -0.87287400 | 3.82794900  | -0.25311600 |
| C | -2.68236500 | 2.44779300  | 1.49160100  |
| C | -1.54948000 | 0.56415900  | 2.75743000  |
| H | -1.03131100 | 2.65549700  | 2.87334700  |
| C | 0.48990900  | -4.34661000 | 2.22777000  |
| H | -0.19332600 | -2.68798200 | 0.99009600  |
| H | 0.36142100  | -2.22162100 | 2.59392400  |
| C | 2.98304600  | -4.35244000 | 2.67050100  |
| H | 4.06846000  | -2.71236000 | 1.76094700  |
| H | 2.98225600  | -2.22646700 | 3.05828700  |
| C | 5.26961900  | -1.58012900 | -2.14610400 |
| H | 3.10753700  | -1.44838600 | -2.24625700 |
| H | 3.70091000  | -2.71423600 | -1.17769900 |
| C | 5.44847400  | 0.82823300  | -1.39768200 |
| H | 3.29516700  | 1.07478300  | -1.46324600 |
| H | 4.01032400  | 1.41261800  | 0.11024500  |
| C | 1.13373500  | 5.18069700  | -1.58114100 |
| H | 0.91617100  | 3.01802400  | -1.74651600 |
| H | 2.14992000  | 3.54338200  | -0.60751000 |
| C | 0.38519600  | 6.13291200  | 0.64471100  |
| H | -0.37067600 | 4.66158600  | 2.04760000  |
| H | 1.35553700  | 4.53258100  | 1.72891100  |
| C | -3.82451000 | 2.44213100  | 2.52244400  |
| H | -2.95881900 | 1.80991000  | 0.64109500  |
| H | -2.56307900 | 3.46329000  | 1.09499400  |
| C | -2.69579300 | 0.56724400  | 3.78294100  |
| H | -1.76057100 | -0.17690300 | 1.97371600  |
| H | -0.62299700 | 0.24316300  | 3.24982800  |
| C | 1.59512400  | -4.67492200 | 3.24196200  |
| H | 0.58185600  | -5.01805500 | 1.36143400  |
| H | -0.49835500 | -4.53657500 | 2.66634900  |
| H | 3.19189700  | -5.02454400 | 1.82510100  |
| H | 3.76059400  | -4.54514600 | 3.42124600  |
| C | 5.59187300  | -0.14297400 | -2.57723800 |
| H | 5.32589500  | -2.25972300 | -3.00614300 |
| H | 6.02991600  | -1.92185500 | -1.42798900 |
| H | 5.63223900  | 1.85949700  | -1.72597800 |
| H | 6.21674400  | 0.59879700  | -0.64413700 |
| C | 1.38805300  | 6.25298800  | -0.51208700 |
| H | 0.15943800  | 5.36621500  | -2.05719700 |
| H | 1.88718500  | 5.24856600  | -2.37650800 |
| H | -0.62396500 | 6.36714100  | 0.27469200  |
| H | 0.61021000  | 6.87220300  | 1.42449000  |
| C | -4.00860600 | 1.05838500  | 3.15888200  |
| H | -4.75460400 | 2.76723600  | 2.03903300  |
| H | -3.60747700 | 3.17802000  | 3.31159400  |
| H | -2.82138100 | -0.44156900 | 4.19728100  |
| H | -2.42823100 | 1.22061600  | 4.62719400  |
| H | 1.54147900  | -5.73053500 | 3.53728100  |
| H | 1.43436100  | -4.08548000 | 4.15721400  |
| H | 4.90346900  | 0.15809200  | -3.38080100 |
| H | 6.60484500  | -0.08799800 | -2.99597300 |
| H | 1.33713000  | 7.25518600  | -0.95653000 |
| H | 2.40936700  | 6.13691500  | -0.11916700 |
| H | -4.33397900 | 0.34598500  | 2.38697300  |
| H | -4.80324700 | 1.08874200  | 3.91544500  |
| C | -2.37080500 | -2.47380700 | -1.99401600 |
| C | -3.26617600 | -1.32960600 | -1.91358300 |
| C | -1.05948600 | -2.30085900 | -2.35881800 |
| C | -4.64560000 | -1.45050800 | -1.62950100 |
| C | -2.73540600 | -0.02628900 | -2.16930200 |
| C | -0.50543200 | -1.00605200 | -2.64771600 |
| H | -0.41912400 | -3.17339600 | -2.45582000 |
| C | -5.47672700 | -0.34223800 | -1.59139300 |
| H | -5.05727000 | -2.44146100 | -1.46707800 |
| C | -3.60875700 | 1.08308900  | -2.14142700 |
| C | -1.33281500 | 0.14058600  | -2.50425500 |
| H | 0.40931200  | -0.95806200 | -3.23305800 |
| C | -4.95523100 | 0.93722900  | -1.85072400 |
| H | -6.53486000 | -0.46623000 | -1.37593800 |
| H | -3.19971800 | 2.06914900  | -2.35319600 |
| H | -1.05214900 | 1.07245100  | -2.99001100 |

|    |             |             |             |
|----|-------------|-------------|-------------|
| H  | -5.60714700 | 1.80706500  | -1.83405300 |
| Pd | 0.09907500  | 0.04542500  | -0.77532700 |
| S  | -2.96694800 | -4.14816900 | -1.74526900 |
| C  | -3.18121100 | -4.21074400 | 0.07754800  |
| H  | -3.58182100 | -5.20130900 | 0.31315500  |
| H  | -2.22388000 | -4.07972200 | 0.58843400  |
| H  | -3.88746500 | -3.44923800 | 0.41916700  |

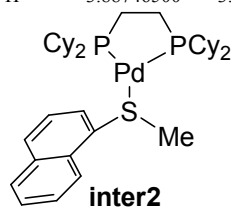

|    |             |             |             |
|----|-------------|-------------|-------------|
| Pd | 0.21293000  | -0.21455200 | -0.63704500 |
| P  | 2.30329000  | -0.77189500 | 0.28625700  |
| P  | -0.07913600 | 1.55690000  | 0.91068100  |
| C  | 2.62311400  | 0.65027300  | 1.49783800  |
| C  | 1.35696700  | 1.28229500  | 2.11648100  |
| C  | 2.55416900  | -2.30346300 | 1.36771900  |
| C  | 1.52954600  | -2.34379600 | 2.52029600  |
| C  | 1.65907700  | -3.61978900 | 3.37034100  |
| C  | 1.55778400  | -4.88779500 | 2.51209200  |
| C  | 2.58717200  | -4.86222800 | 1.37406800  |
| C  | 2.45488500  | -3.58927200 | 0.52045100  |
| C  | 3.89961100  | -0.75241900 | -0.73573600 |
| C  | 3.84744100  | 0.34926200  | -1.81510600 |
| C  | 5.06500200  | 0.28191700  | -2.75242200 |
| C  | 6.38703000  | 0.34371700  | -1.97295300 |
| C  | 6.44418200  | -0.74405100 | -0.89060100 |
| C  | 5.22617000  | -0.67556300 | 0.04873600  |
| C  | -1.51158100 | 1.72278500  | 2.14158100  |
| C  | -1.86643500 | 0.35007200  | 2.75361400  |
| C  | -3.05567700 | 0.44049000  | 3.72511600  |
| C  | -4.29109100 | 1.04769500  | 3.04676900  |
| C  | -3.95868800 | 2.41213800  | 2.42885100  |
| C  | -2.76039100 | 2.32893300  | 1.46714400  |
| C  | 0.15528700  | 3.34168500  | 0.31878200  |
| C  | 1.30342100  | 3.44250800  | -0.70721000 |
| C  | 1.38193100  | 4.84601100  | -1.33152400 |
| C  | 1.51592900  | 5.93550600  | -0.25741600 |
| C  | 0.38600500  | 5.83706800  | 0.77765500  |
| C  | 0.30374300  | 4.43047800  | 1.40061900  |
| H  | 3.30372000  | 0.33245000  | 2.29911300  |
| H  | 3.16086700  | 1.41238000  | 0.92214500  |
| H  | 1.62604800  | 2.21622300  | 2.62555300  |
| H  | 0.96258500  | 0.61632100  | 2.89125400  |
| H  | 3.56008400  | -2.25332500 | 1.81111600  |
| H  | 0.51620700  | -2.28282500 | 2.09792500  |
| H  | 1.65214500  | -1.46690000 | 3.16702300  |
| H  | 0.88810600  | -3.62370300 | 4.15201500  |
| H  | 2.62942200  | -3.61213300 | 3.88910900  |
| H  | 0.54664500  | -4.95632100 | 2.08381500  |
| H  | 1.69610800  | -5.78216400 | 3.13331100  |
| H  | 2.47451500  | -5.74891000 | 0.73648500  |
| H  | 3.60013100  | -4.91195000 | 1.80085200  |
| H  | 1.48397500  | -3.59299000 | 0.00472100  |
| H  | 3.22252800  | -3.59454300 | -0.26316700 |
| H  | 3.87593800  | -1.71663500 | -1.26586300 |
| H  | 3.82386200  | 1.33783900  | -1.33307100 |
| H  | 2.91555700  | 0.26137100  | -2.38635000 |
| H  | 5.01671500  | 1.09700900  | -3.48625000 |
| H  | 5.02639500  | -0.65662700 | -3.32544500 |
| H  | 6.48025500  | 1.33156900  | -1.49706700 |
| H  | 7.23968800  | 0.24570200  | -2.65739100 |
| H  | 7.37066300  | -0.65512500 | -0.30791200 |
| H  | 6.47216600  | -1.73291000 | -1.37219800 |
| H  | 5.26517000  | 0.26715500  | 0.61270700  |
| H  | 5.29097700  | -1.48387000 | 0.78716800  |
| H  | -1.19358500 | 2.39171300  | 2.95636800  |
| H  | -1.00255200 | -0.07805400 | 3.27637300  |



|   |             |             |             |
|---|-------------|-------------|-------------|
| H | -2.11521900 | -0.34512300 | 1.94044100  |
| H | -2.77447800 | 1.05848300  | 4.59140700  |
| H | -3.28823500 | -0.55835000 | 4.11754700  |
| H | -5.11394900 | 1.14561000  | 3.76715200  |
| H | -4.64110600 | 0.36640500  | 2.25779100  |
| H | -3.72851300 | 3.12759700  | 3.23292300  |
| H | -4.83093100 | 2.81315000  | 1.89607500  |
| H | -2.54350600 | 3.33088600  | 1.07917600  |
| H | -3.02999100 | 1.70818300  | 0.60045400  |
| H | -0.77556700 | 3.53972700  | -0.23331100 |
| H | 1.17202700  | 2.68108800  | -1.48529500 |
| H | 2.26014300  | 3.22355300  | -0.21057000 |
| H | 0.47176300  | 5.02829300  | -1.92202100 |
| H | 2.22450600  | 4.89659400  | -2.03363500 |
| H | 1.52232000  | 6.93104800  | -0.71995900 |
| H | 2.48424300  | 5.82218900  | 0.25316800  |
| H | -0.57239600 | 6.07125600  | 0.29084700  |
| H | 0.52522400  | 6.58715700  | 1.56751500  |
| H | -0.53101600 | 4.39341200  | 2.11098000  |
| H | 1.21834800  | 4.24983900  | 1.98299000  |
| S | -1.04272200 | -0.83860000 | -2.61501900 |
| C | -0.88739500 | -2.57949400 | -3.20263600 |
| H | 0.18097700  | -2.75158800 | -3.35327400 |
| H | -1.26729100 | -3.28464400 | -2.45961800 |
| H | -1.42164100 | -2.70865900 | -4.14829900 |
| C | -2.84233400 | -0.71450300 | -2.52755800 |
| C | -3.60967900 | -1.35188500 | -1.49609400 |
| C | -3.47341700 | 0.05292700  | -3.48807400 |
| C | -3.03018100 | -2.12418500 | -0.45210500 |
| C | -5.03784600 | -1.19719600 | -1.51623800 |
| C | -4.87915900 | 0.21596200  | -3.48652900 |
| H | -2.87652000 | 0.53158300  | -4.25864400 |
| C | -3.81707700 | -2.72795300 | 0.50528800  |
| H | -1.94845100 | -2.20563400 | -0.40226600 |
| C | -5.81778300 | -1.83469300 | -0.51321400 |
| C | -5.64449000 | -0.40362500 | -2.52725300 |
| H | -5.34699800 | 0.82481200  | -4.25544300 |
| C | -5.22535800 | -2.58917200 | 0.47401600  |
| H | -3.35213200 | -3.31021300 | 1.29651900  |
| H | -6.89819500 | -1.71280000 | -0.54086800 |
| H | -6.72639600 | -0.29358400 | -2.52562200 |
| H | -5.83418000 | -3.07294300 | 1.23309100  |

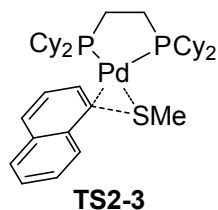

|    |             |             |             |
|----|-------------|-------------|-------------|
| Pd | -0.44958400 | 0.54076500  | -0.96027000 |
| P  | -2.47624300 | 0.03476700  | 0.35772300  |
| P  | 0.76181400  | 0.41669700  | 1.13345400  |
| C  | -1.86868600 | -0.34755600 | 2.10037900  |
| C  | -0.55196100 | 0.36015700  | 2.48450200  |
| C  | -3.73484600 | 1.41690500  | 0.60158000  |
| C  | -3.07360100 | 2.67860000  | 1.19686400  |
| C  | -4.07137100 | 3.84179600  | 1.33200800  |
| C  | -4.74395900 | 4.16860900  | -0.00790600 |
| C  | -5.41423900 | 2.92232800  | -0.60148800 |
| C  | -4.42193800 | 1.75492700  | -0.74037100 |
| C  | -3.56737500 | -1.45967700 | -0.02988500 |
| C  | -2.70875100 | -2.68421700 | -0.41172100 |
| C  | -3.57845700 | -3.86616400 | -0.87143600 |
| C  | -4.62801000 | -4.24152500 | 0.18521100  |
| C  | -5.48326500 | -3.02696800 | 0.57308800  |
| C  | -4.61428400 | -1.84336900 | 1.03710800  |
| C  | 1.87191400  | 1.78805700  | 1.81371100  |
| C  | 1.22400200  | 3.17318300  | 1.59744200  |
| C  | 2.10144400  | 4.30667600  | 2.15665500  |
| C  | 3.51035300  | 4.27751400  | 1.54757400  |

|   |             |             |             |
|---|-------------|-------------|-------------|
| C | 4.16321900  | 2.90240300  | 1.73907300  |
| C | 3.28272400  | 1.76739300  | 1.18626900  |
| C | 1.79936100  | -1.13799000 | 1.38128400  |
| C | 1.07132400  | -2.39876000 | 0.86990600  |
| C | 1.99638100  | -3.62715700 | 0.89747800  |
| C | 2.58109600  | -3.86623900 | 2.29724600  |
| C | 3.28527300  | -2.60957300 | 2.82929200  |
| C | 2.35837300  | -1.37983100 | 2.79822200  |
| H | -2.64426700 | -0.11360000 | 2.84112600  |
| H | -1.72468000 | -1.43330000 | 2.13758200  |
| H | -0.14617900 | -0.08532600 | 3.40122500  |
| H | -0.75995800 | 1.40893700  | 2.72053400  |
| H | -4.50142200 | 1.07119900  | 1.31207900  |
| H | -2.23926500 | 2.98600600  | 0.55089700  |
| H | -2.64624400 | 2.45465200  | 2.18195900  |
| H | -3.55444600 | 4.72579900  | 1.72721400  |
| H | -4.84261700 | 3.57469900  | 2.07009600  |
| H | -3.98623100 | 4.54261700  | -0.71180400 |
| H | -5.47906000 | 4.97346900  | 0.12012600  |
| H | -5.84996000 | 3.15286600  | -1.58204500 |
| H | -6.24873200 | 2.61569000  | 0.04716000  |
| H | -3.65043800 | 2.01327100  | -1.47943500 |
| H | -4.95001700 | 0.87709800  | -1.13294900 |
| H | -4.10865700 | -1.15357600 | -0.93757300 |
| H | -2.10884600 | -3.00073400 | 0.45400400  |
| H | -1.99550900 | -2.40693900 | -1.19733800 |
| H | -2.94130800 | -4.72992100 | -1.10092300 |
| H | -4.08769100 | -3.59585900 | -1.80845800 |
| H | -4.11739600 | -4.62468700 | 1.08144500  |
| H | -5.26650500 | -5.05497300 | -0.18217000 |
| H | -6.19499700 | -3.29753000 | 1.36386200  |
| H | -6.08401200 | -2.71439700 | -0.29382200 |
| H | -4.10294100 | -2.12135400 | 1.96979400  |
| H | -5.25792900 | -0.98828900 | 1.27564700  |
| H | 1.97153000  | 1.62177700  | 2.89807400  |
| H | 0.23056700  | 3.21783700  | 2.06111100  |
| H | 1.07435900  | 3.32487500  | 0.52071600  |
| H | 2.17299600  | 4.20746900  | 3.25043100  |
| H | 1.62033600  | 5.27423800  | 1.96235200  |
| H | 4.13527100  | 5.06235400  | 1.99329300  |
| H | 3.44365800  | 4.49444800  | 0.47260800  |
| H | 4.34435600  | 2.73126400  | 2.81128800  |
| H | 5.14393600  | 2.87533900  | 1.24753500  |
| H | 3.77840500  | 0.80847400  | 1.37413500  |
| H | 3.19570400  | 1.86951300  | 0.09734200  |
| H | 2.64812500  | -0.97065500 | 0.70201500  |
| H | 0.69963700  | -2.22394500 | -0.14539000 |
| H | 0.19441300  | -2.60019800 | 1.50263100  |
| H | 2.81591700  | -3.47103400 | 0.18105100  |
| H | 1.44808500  | -4.51516300 | 0.55673100  |
| H | 3.27859300  | -4.71350400 | 2.28041200  |
| H | 1.76902600  | -4.14425500 | 2.98615000  |
| H | 4.17369600  | -2.40329400 | 2.21456100  |
| H | 3.64599300  | -2.77812800 | 3.85240300  |
| H | 2.90231600  | -0.50081000 | 3.16319800  |
| H | 1.52666700  | -1.54682600 | 3.49785200  |
| S | -0.82894000 | 1.28822700  | -3.23623500 |
| C | -1.53699400 | -0.11275200 | -4.17303700 |
| H | -2.24486600 | -0.69390100 | -3.57673000 |
| H | -2.04952100 | 0.30876500  | -5.04300200 |
| H | -0.72779000 | -0.76364800 | -4.52221400 |
| C | 0.99851000  | 0.56740200  | -2.55256800 |
| C | 2.06835000  | 1.54703200  | -2.62374400 |
| C | 1.30030800  | -0.76966300 | -2.85523800 |
| C | 1.84585500  | 2.92573300  | -2.39658000 |
| C | 3.39824300  | 1.11345100  | -2.94273700 |
| C | 2.62223900  | -1.17375300 | -3.14662100 |
| H | 0.51490500  | -1.51968400 | -2.83710400 |
| C | 2.87143600  | 3.84982000  | -2.47857400 |
| H | 0.83909100  | 3.25716600  | -2.15715000 |
| C | 4.43346100  | 2.08483100  | -3.00691800 |
| C | 3.65683400  | -0.26590000 | -3.19168400 |
| H | 2.81474200  | -2.22684100 | -3.34344300 |
| C | 4.18223800  | 3.42257100  | -2.78377600 |
| H | 2.66817700  | 4.90462000  | -2.31231600 |

|   |            |             |             |
|---|------------|-------------|-------------|
| H | 5.44032500 | 1.74976100  | -3.24794100 |
| H | 4.66871500 | -0.57925700 | -3.43497800 |
| H | 4.98936300 | 4.14811600  | -2.84753400 |

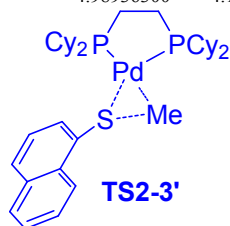

|    |             |             |             |
|----|-------------|-------------|-------------|
| Pd | -0.44958400 | 0.54076500  | -0.96027000 |
| P  | -2.47624300 | 0.03476700  | 0.35772300  |
| P  | 0.76181400  | 0.41669700  | 1.13345400  |
| C  | -1.86868600 | -0.34755600 | 2.10037900  |
| C  | -0.55196100 | 0.36015700  | 2.48450200  |
| C  | -3.73484600 | 1.41690500  | 0.60158000  |
| C  | -3.07360100 | 2.67860000  | 1.19686400  |
| C  | -4.07137100 | 3.84179600  | 1.33200800  |
| C  | -4.74395900 | 4.16860900  | -0.00790600 |
| C  | -5.41423900 | 2.92232800  | -0.60148800 |
| C  | -4.42193800 | 1.75492700  | -0.74037100 |
| C  | -3.56737500 | -1.45967700 | -0.02988500 |
| C  | -2.70875100 | -2.68421700 | -0.41172100 |
| C  | -3.57845700 | -3.86616400 | -0.87143600 |
| C  | -4.62801000 | -4.24152500 | 0.18521100  |
| C  | -5.48326500 | -3.02696800 | 0.57308800  |
| C  | -4.61428400 | -1.84336900 | 1.03710800  |
| C  | 1.87191400  | 1.78805700  | 1.81371100  |
| C  | 1.22400200  | 3.17318300  | 1.59744200  |
| C  | 2.10144400  | 4.30667600  | 2.15665500  |
| C  | 3.51035300  | 4.27751400  | 1.54757400  |
| C  | 4.16321900  | 2.90240300  | 1.73907300  |
| C  | 3.28272400  | 1.76739300  | 1.18626900  |
| C  | 1.79936100  | -1.13799000 | 1.38128400  |
| C  | 1.07132400  | -2.39876000 | 0.86990600  |
| C  | 1.99638100  | -3.62715700 | 0.89747800  |
| C  | 2.58109600  | -3.86623900 | 2.29724600  |
| C  | 3.28527300  | -2.60957300 | 2.82929200  |
| C  | 2.35837300  | -1.37983100 | 2.79822200  |
| H  | -2.64426700 | -0.11360000 | 2.84112600  |
| H  | -1.72468000 | -1.43330000 | 2.13758200  |
| H  | -0.14617900 | -0.08532600 | 3.40122500  |
| H  | -0.75995800 | 1.40893700  | 2.72053400  |
| H  | -4.50142200 | 1.07119900  | 1.31207900  |
| H  | -2.23926500 | 2.98600600  | 0.55089700  |
| H  | -2.64624400 | 2.45465200  | 2.18195900  |
| H  | -3.55444600 | 4.72579900  | 1.72721400  |
| H  | -4.84261700 | 3.57469900  | 2.07009600  |
| H  | -3.98623100 | 4.54261700  | -0.71180400 |
| H  | -5.47906000 | 4.97346900  | 0.12012600  |
| H  | -5.84996000 | 3.15286600  | -1.58204500 |
| H  | -6.24873200 | 2.61569000  | 0.04716000  |
| H  | -3.65043800 | 2.01327100  | -1.47943500 |
| H  | -4.95001700 | 0.87709800  | -1.13294900 |
| H  | -4.10865700 | -1.15357600 | -0.93757300 |
| H  | -2.10884600 | -3.00073400 | 0.45400400  |
| H  | -1.99550900 | -2.40693900 | -1.19733800 |
| H  | -2.94130800 | -4.72992100 | -1.10092300 |
| H  | -4.08769100 | -3.59585900 | -1.80845800 |
| H  | -4.11739600 | -4.62468700 | 1.08144500  |
| H  | -5.26650500 | -5.05497300 | -0.18217000 |
| H  | -6.19499700 | -3.29753000 | 1.36386200  |
| H  | -6.08401200 | -2.71439700 | -0.29382200 |
| H  | -4.10294100 | -2.12135400 | 1.96979400  |
| H  | -5.25792900 | -0.98828900 | 1.27564700  |
| H  | 1.97153000  | 1.62177700  | 2.89807400  |
| H  | 0.23056700  | 3.21783700  | 2.06111100  |
| H  | 1.07435900  | 3.32487500  | 0.52071600  |
| H  | 2.17299600  | 4.20746900  | 3.25043100  |
| H  | 1.62033600  | 5.27423800  | 1.96235200  |
| H  | 4.13527100  | 5.06235400  | 1.99329300  |
| H  | 3.44365800  | 4.49444800  | 0.47260800  |

|   |             |             |             |
|---|-------------|-------------|-------------|
| H | 4.34435600  | 2.73126400  | 2.81128800  |
| H | 5.14393600  | 2.87533900  | 1.24753500  |
| H | 3.77840500  | 0.80847400  | 1.37413500  |
| H | 3.19570400  | 1.86951300  | 0.09734200  |
| H | 2.64812500  | -0.97065500 | 0.70201500  |
| H | 0.69963700  | -2.22394500 | -0.14539000 |
| H | 0.19441300  | -2.60019800 | 1.50263100  |
| H | 2.81591700  | -3.47103400 | 0.18105100  |
| H | 1.44808500  | -4.51516300 | 0.55673100  |
| H | 3.27859300  | -4.71350400 | 2.28041200  |
| H | 1.76902600  | -4.14425500 | 2.98615000  |
| H | 4.17369600  | -2.40329400 | 2.21456100  |
| H | 3.64599300  | -2.77812800 | 3.85240300  |
| H | 2.90231600  | -0.50081000 | 3.16319800  |
| H | 1.52666700  | -1.54682600 | 3.49785200  |
| S | -0.95319214 | 1.44130043  | -3.15527385 |
| C | -1.38717690 | 0.07870853  | -4.21517977 |
| C | -1.89033700 | 0.35977811  | -5.51518374 |
| C | -1.24040988 | -1.21856126 | -3.79030665 |
| C | -2.05269184 | 1.69334619  | -5.98139509 |
| C | -2.23965395 | -0.71735438 | -6.37013913 |
| C | -1.58883094 | -2.29408175 | -4.64327318 |
| H | -0.85150177 | -1.43951101 | -2.78541170 |
| C | -2.54097183 | 1.93667489  | -7.24113966 |
| H | -1.77923633 | 2.52251947  | -5.31175005 |
| C | -2.74281806 | -0.43650572 | -7.66984531 |
| C | -2.07687275 | -2.05067926 | -5.90316120 |
| H | -1.46250661 | -3.32471771 | -4.28029992 |
| C | -2.88959718 | 0.86141355  | -8.09402053 |
| H | -2.66754917 | 2.96733607  | -7.60405248 |
| H | -3.01094912 | -1.27875993 | -8.32495794 |
| H | -2.35019688 | -2.88012751 | -6.57254739 |
| H | -3.27859055 | 1.08226955  | -9.09891035 |
| C | 0.90491331  | 0.96739720  | -2.43872257 |
| H | 0.72986168  | 0.32755660  | -3.27828253 |
| H | 0.79498665  | 1.98839486  | -2.73935507 |
| H | 1.89687287  | 0.80892123  | -2.07020987 |

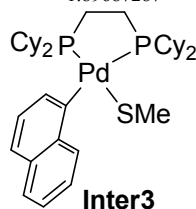

|    |             |             |             |
|----|-------------|-------------|-------------|
| Pd | -0.11529500 | -0.22449000 | 0.66654900  |
| P  | -2.23254000 | -0.26737600 | -0.50633600 |
| P  | 0.69002500  | 1.06783200  | -1.14233700 |
| C  | -2.08157000 | 0.96434700  | -1.91819700 |
| C  | -0.64697300 | 1.08585400  | -2.46557600 |
| C  | -2.78483200 | -1.86293600 | -1.33666900 |
| C  | -1.66981200 | -2.43808200 | -2.23684900 |
| C  | -2.08865600 | -3.76206800 | -2.89888100 |
| C  | -2.53569900 | -4.79771300 | -1.85915900 |
| C  | -3.65596000 | -4.23304600 | -0.97590800 |
| C  | -3.24166900 | -2.91430100 | -0.30075100 |
| C  | -3.74023700 | 0.29435600  | 0.45670100  |
| C  | -3.46037400 | 1.59729600  | 1.23556100  |
| C  | -4.65782400 | 1.98335800  | 2.12006000  |
| C  | -5.95562100 | 2.09486200  | 1.30721600  |
| C  | -6.23318800 | 0.80158700  | 0.52811800  |
| C  | -5.04214900 | 0.40696800  | -0.36390100 |
| C  | 2.20194800  | 0.56610100  | -2.14761400 |
| C  | 2.15310500  | -0.93293900 | -2.51795300 |
| C  | 3.36358600  | -1.34157400 | -3.37502900 |
| C  | 4.68635900  | -1.00908400 | -2.67080500 |
| C  | 4.74381700  | 0.47628200  | -2.28957400 |
| C  | 3.53377500  | 0.89388500  | -1.43542300 |
| C  | 0.99930600  | 2.87004100  | -0.70776100 |
| C  | -0.17005100 | 3.46872400  | 0.10278600  |
| C  | 0.16731200  | 4.88317400  | 0.60281500  |
| C  | 0.55479600  | 5.81329300  | -0.55596700 |

|   |             |             |             |
|---|-------------|-------------|-------------|
| C | 1.69690100  | 5.21687800  | -1.39176700 |
| C | 1.36288000  | 3.79694900  | -1.88684500 |
| H | -2.77306700 | 0.70850100  | -2.73075800 |
| H | -2.40980200 | 1.93031100  | -1.51916700 |
| H | -0.55068900 | 1.98297000  | -3.08846600 |
| H | -0.42700400 | 0.23340200  | -3.11603000 |
| H | -3.64174400 | -1.60719200 | -1.97872000 |
| H | -0.77024900 | -2.59901000 | -1.62767200 |
| H | -1.39860600 | -1.71779600 | -3.01879700 |
| H | -1.25563300 | -4.15139200 | -3.49823800 |
| H | -2.91566500 | -3.57064800 | -3.59915700 |
| H | -1.67871200 | -5.07159400 | -1.22696100 |
| H | -2.86723500 | -5.71793900 | -2.35680200 |
| H | -3.93976100 | -4.96143600 | -0.20612000 |
| H | -4.55199400 | -4.06394500 | -1.59249400 |
| H | -2.42700500 | -3.09932500 | 0.41140300  |
| H | -4.08300300 | -2.53158500 | 0.28828600  |
| H | -3.86171700 | -0.49782600 | 1.20887800  |
| H | -3.25980300 | 2.41973200  | 0.53271300  |
| H | -2.56385500 | 1.46428700  | 1.84979200  |
| H | -4.44660200 | 2.92963600  | 2.63432900  |
| H | -4.78076000 | 1.22253000  | 2.90391200  |
| H | -5.87087000 | 2.93292500  | 0.59866800  |
| H | -6.80098700 | 2.32857300  | 1.96684300  |
| H | -7.13612400 | 0.90936300  | -0.08681200 |
| H | -6.43320600 | -0.01362900 | 1.23864100  |
| H | -4.91659600 | 1.16690500  | -1.14942100 |
| H | -5.26615500 | -0.53733700 | -0.87406400 |
| H | 2.15534100  | 1.15082800  | -3.08014500 |
| H | 1.22710600  | -1.17493400 | -3.05427600 |
| H | 2.14771400  | -1.52366100 | -1.59415700 |
| H | 3.32132100  | -0.81743700 | -4.34186100 |
| H | 3.30770600  | -2.41467500 | -3.59810300 |
| H | 5.53640700  | -1.27028400 | -3.31410000 |
| H | 4.77524600  | -1.62072500 | -1.76218400 |
| H | 4.77168900  | 1.08652700  | -3.20531500 |
| H | 5.66813500  | 0.69452900  | -1.74019300 |
| H | 3.60228200  | 1.96472700  | -1.21339200 |
| H | 3.56828200  | 0.36964900  | -0.47380100 |
| H | 1.86423900  | 2.81505600  | -0.03182200 |
| H | -0.42002000 | 2.81157000  | 0.94298400  |
| H | -1.06682700 | 3.52382300  | -0.53158400 |
| H | 1.00103900  | 4.82247900  | 1.31722700  |
| H | -0.68707900 | 5.29562800  | 1.15424700  |
| H | 0.84121200  | 6.80107900  | -0.17357800 |
| H | -0.32192700 | 5.97048400  | -1.20212900 |
| H | 2.61144700  | 5.17699600  | -0.78243600 |
| H | 1.92127500  | 5.86376900  | -2.24956800 |
| H | 2.21036000  | 3.39786500  | -2.45558900 |
| H | 0.51502400  | 3.85573300  | -2.58428500 |
| S | -1.13783700 | -1.38749600 | 2.47771300  |
| C | 0.01176900  | -1.62452500 | 3.89101000  |
| H | 0.40301100  | -0.67135900 | 4.25423500  |
| H | -0.56361300 | -2.10205200 | 4.69105300  |
| H | 0.84818400  | -2.27404900 | 3.62274200  |
| C | 1.70168200  | -0.09951000 | 1.64628500  |
| C | 2.65056100  | -1.17692600 | 1.63378300  |
| C | 2.04414100  | 1.05802800  | 2.32749300  |
| C | 2.37346500  | -2.42682100 | 1.00831300  |
| C | 3.93050600  | -1.01988500 | 2.27496900  |
| C | 3.29557400  | 1.20797400  | 2.98012200  |
| H | 1.33987500  | 1.88565500  | 2.38020300  |
| C | 3.30033300  | -3.44715500 | 0.98457200  |
| H | 1.38919300  | -2.56285500 | 0.56849500  |
| C | 4.86750300  | -2.08923800 | 2.22744100  |
| C | 4.22710200  | 0.19690500  | 2.94516200  |
| H | 3.51604000  | 2.13527900  | 3.50552800  |
| C | 4.56711500  | -3.27409800 | 1.59407600  |
| H | 3.05701400  | -4.39298800 | 0.50672700  |
| H | 5.83280300  | -1.95440300 | 2.71171900  |
| H | 5.19318500  | 0.30907900  | 3.43265800  |
| H | 5.29432600  | -4.08194000 | 1.57123100  |

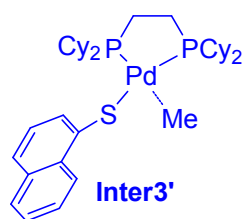

|    |             |             |             |
|----|-------------|-------------|-------------|
| Pd | 0.12423400  | -0.12237200 | -0.30842300 |
| P  | -1.14936300 | 1.66520000  | 0.73204400  |
| P  | -1.60107900 | -1.55156100 | 0.31908800  |
| C  | -2.85221200 | 0.93458800  | 1.05754400  |
| C  | -2.81230000 | -0.57200700 | 1.37632200  |
| C  | -0.64050600 | 2.42523200  | 2.37666000  |
| C  | -0.37247600 | 1.33336400  | 3.43425800  |
| C  | 0.09230600  | 1.93050700  | 4.77387700  |
| C  | 1.32474800  | 2.82746600  | 4.59630500  |
| C  | 1.05577500  | 3.92337900  | 3.55760700  |
| C  | 0.59749700  | 3.33536200  | 2.21213300  |
| C  | -1.48783100 | 3.14430500  | -0.37280200 |
| C  | -1.91062700 | 2.69832400  | -1.78965700 |
| C  | -2.07223300 | 3.90444600  | -2.73059500 |
| C  | -3.05443100 | 4.93989800  | -2.16500900 |
| C  | -2.63789500 | 5.38451400  | -0.75616200 |
| C  | -2.47407000 | 4.18581800  | 0.19647300  |
| C  | -1.24612900 | -3.02339200 | 1.44173200  |
| C  | -0.31408100 | -2.61415600 | 2.60427700  |
| C  | -0.04897400 | -3.79061600 | 3.55975300  |
| C  | 0.51727800  | -5.00869200 | 2.81665600  |
| C  | -0.39533000 | -5.41379200 | 1.65187600  |
| C  | -0.64988200 | -4.23639700 | 0.69433700  |
| C  | -2.60764900 | -2.26437900 | -1.09866200 |
| C  | -2.96965900 | -1.17750000 | -2.13325500 |
| C  | -3.64692600 | -1.79064000 | -3.37013200 |
| C  | -4.88277000 | -2.61811400 | -2.98863000 |
| C  | -4.53518900 | -3.68974900 | -1.94503500 |
| C  | -3.85788400 | -3.07789800 | -0.70421400 |
| H  | -3.36267200 | 1.47547100  | 1.86437600  |
| H  | -3.43782600 | 1.10278900  | 0.14691200  |
| H  | -3.81714400 | -1.00468700 | 1.30374500  |
| H  | -2.48769800 | -0.72086200 | 2.41137100  |
| H  | -1.48496900 | 3.03877200  | 2.72621500  |
| H  | 0.39561000  | 0.64782500  | 3.05101100  |
| H  | -1.27691200 | 0.73479700  | 3.60175200  |
| H  | 0.30470500  | 1.11986700  | 5.48285400  |
| H  | -0.72654400 | 2.52171300  | 5.21078900  |
| H  | 2.17593200  | 2.21475800  | 4.26579100  |
| H  | 1.61210600  | 3.27283300  | 5.55727700  |
| H  | 1.95554100  | 4.53121600  | 3.40100600  |
| H  | 0.28099100  | 4.60415300  | 3.94223000  |
| H  | 1.41448300  | 2.75698800  | 1.76072700  |
| H  | 0.38092700  | 4.15518200  | 1.51767000  |
| H  | -0.49868100 | 3.61296700  | -0.47427400 |
| H  | -2.86769100 | 2.15736100  | -1.74296900 |
| H  | -1.16586500 | 2.00173900  | -2.18906200 |
| H  | -2.40598800 | 3.55973600  | -3.71769000 |
| H  | -1.09015600 | 4.37548900  | -2.87953100 |
| H  | -4.06290500 | 4.50089400  | -2.12346000 |
| H  | -3.12024200 | 5.80875500  | -2.83219400 |
| H  | -3.37224200 | 6.08782400  | -0.34232400 |
| H  | -1.68334500 | 5.92747600  | -0.81516900 |
| H  | -3.45662000 | 3.71540400  | 0.35031900  |
| H  | -2.14100400 | 4.54412900  | 1.17773300  |
| H  | -2.21583400 | -3.32481000 | 1.86868500  |
| H  | -0.74010100 | -1.77615700 | 3.16837600  |
| H  | 0.63528900  | -2.25483200 | 2.18517500  |
| H  | -0.98900500 | -4.07284900 | 4.05735300  |
| H  | 0.63984300  | -3.47083200 | 4.35185500  |
| H  | 0.64919600  | -5.84978300 | 3.50894300  |
| H  | 1.51516600  | -4.76306300 | 2.42562700  |
| H  | -1.35639600 | -5.77358400 | 2.04930700  |
| H  | 0.04477300  | -6.24999700 | 1.09420400  |
| H  | -1.31393700 | -4.56507700 | -0.11311900 |

|   |             |             |             |
|---|-------------|-------------|-------------|
| H | 0.29660200  | -3.94060400 | 0.22551400  |
| H | -1.89865300 | -2.94683400 | -1.58920100 |
| H | -2.06833800 | -0.62697700 | -2.42440300 |
| H | -3.65587100 | -0.44837800 | -1.67704900 |
| H | -2.92348600 | -2.43341400 | -3.89249800 |
| H | -3.92215200 | -0.99533300 | -4.07427200 |
| H | -5.32001200 | -3.08530100 | -3.87995800 |
| H | -5.65312500 | -1.94904000 | -2.57641100 |
| H | -3.85796900 | -4.43037300 | -2.39505100 |
| H | -5.43748800 | -4.23594500 | -1.64151500 |
| H | -3.60169800 | -3.87256200 | 0.00623500  |
| H | -4.58023000 | -2.42272800 | -0.19672000 |
| S | 1.85672200  | 1.46102900  | -0.88991400 |
| C | 3.19555500  | 0.70454100  | -1.79564800 |
| C | 4.28435000  | 0.02877100  | -1.13727400 |
| C | 3.22598700  | 0.82591000  | -3.17761800 |
| C | 4.34688200  | -0.13980300 | 0.27270700  |
| C | 5.36377000  | -0.49570500 | -1.92854000 |
| C | 4.29293300  | 0.31028800  | -3.94809700 |
| H | 2.40698300  | 1.33935700  | -3.67258600 |
| C | 5.40325600  | -0.79258200 | 0.87087900  |
| H | 3.53741000  | 0.26744200  | 0.86844700  |
| C | 6.43826200  | -1.16344400 | -1.27906800 |
| C | 5.34199500  | -0.33908300 | -3.33968600 |
| H | 4.27620400  | 0.43169500  | -5.02865000 |
| C | 6.46183900  | -1.31288600 | 0.08873700  |
| H | 5.42782300  | -0.90553300 | 1.95218100  |
| H | 7.24833200  | -1.55614800 | -1.89023400 |
| H | 6.16617800  | -0.73926200 | -3.92595500 |
| H | 7.29149000  | -1.82517800 | 0.56965100  |
| C | 1.08374100  | -1.65377500 | -1.36746200 |
| H | 1.38249300  | -1.21443100 | -2.32175700 |
| H | 1.97677700  | -1.93715100 | -0.80171500 |
| H | 0.46951900  | -2.53947700 | -1.55398800 |

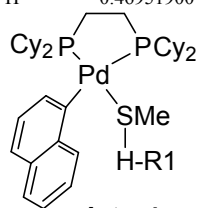

|   |             |             |             |
|---|-------------|-------------|-------------|
| P | 0.80616600  | 2.35927900  | 0.54131700  |
| P | 1.10794800  | -0.71082900 | 1.66415000  |
| C | 1.62264200  | 2.07236700  | 2.20951300  |
| C | 1.97909500  | 3.51198300  | -0.36035400 |
| C | -0.69057300 | 3.42873700  | 0.93412800  |
| C | 1.21959700  | 0.73805500  | 2.86437700  |
| C | -0.16930500 | -1.84285800 | 2.44705800  |
| C | 2.74536700  | -1.59932700 | 1.94103600  |
| H | 2.70253000  | 2.08290200  | 2.02611500  |
| H | 1.41032500  | 2.90542900  | 2.89107700  |
| C | 3.25792700  | 2.77272500  | -0.80989600 |
| C | 2.32589000  | 4.81686000  | 0.38602500  |
| H | 1.42743600  | 3.76369200  | -1.27707800 |
| C | -1.32362800 | 4.01449000  | -0.34692900 |
| C | -1.74317200 | 2.64912100  | 1.75130500  |
| H | -0.32546700 | 4.26133700  | 1.55556000  |
| H | 1.91620900  | 0.49040200  | 3.67478800  |
| H | 0.23080100  | 0.83698500  | 3.32293100  |
| C | -1.58250500 | -1.22229400 | 2.40406200  |
| C | 0.16233400  | -2.32405400 | 3.87645600  |
| H | -0.17760200 | -2.71330100 | 1.77611000  |
| C | 2.76420900  | -3.03998400 | 1.38593300  |
| C | 3.92769300  | -0.78409400 | 1.37515500  |
| H | 2.86622200  | -1.65310300 | 3.03411900  |
| C | 4.16051900  | 3.68697500  | -1.65542000 |
| H | 2.97668700  | 1.88402400  | -1.38445100 |
| H | 3.82407100  | 2.42805600  | 0.06848800  |
| C | 3.23624100  | 5.72201000  | -0.46379200 |
| H | 1.41657500  | 5.36619500  | 0.65704200  |
| H | 2.84044700  | 4.57532700  | 1.32764800  |

|   |             |             |             |
|---|-------------|-------------|-------------|
| C | -2.56506500 | 4.86562200  | -0.02738500 |
| H | -1.59603700 | 3.19350400  | -1.02253900 |
| H | -0.59496300 | 4.62947800  | -0.88776300 |
| C | -2.97290000 | 3.51710300  | 2.06864600  |
| H | -2.06787500 | 1.76770800  | 1.18455100  |
| H | -1.30498500 | 2.28761800  | 2.69002500  |
| C | -2.63939800 | -2.21833700 | 2.90846100  |
| H | -1.83196100 | -0.88858300 | 1.39235200  |
| H | -1.61475400 | -0.32770100 | 3.04225900  |
| C | -0.90274000 | -3.30923100 | 4.39343700  |
| H | 1.14620100  | -2.80513000 | 3.91331100  |
| H | 0.20933900  | -1.45816900 | 4.55310000  |
| C | 4.11502600  | -3.72358900 | 1.66248000  |
| H | 2.58310700  | -3.01831200 | 0.30615800  |
| H | 1.95726300  | -3.63505700 | 1.82872000  |
| C | 5.27508700  | -1.47717400 | 1.64065200  |
| H | 3.78825100  | -0.65964800 | 0.29434100  |
| H | 3.94492300  | 0.22204300  | 1.81206000  |
| C | 4.50628500  | 4.98783700  | -0.91705800 |
| H | 3.64341200  | 3.92657900  | -2.59547600 |
| H | 5.07649200  | 3.14889500  | -1.93110700 |
| H | 2.67762700  | 6.06090900  | -1.34839600 |
| H | 3.49657500  | 6.62359700  | 0.10578800  |
| C | -3.60196100 | 4.08189100  | 0.78864000  |
| H | -3.00761300 | 5.22735600  | -0.96412400 |
| H | -2.25833600 | 5.75860400  | 0.53867800  |
| H | -3.70647800 | 2.91774900  | 2.62240400  |
| H | -2.67809200 | 4.34593900  | 2.73035000  |
| C | -2.31635000 | -2.71432500 | 4.32490700  |
| H | -2.68378600 | -3.07589000 | 2.22147700  |
| H | -3.62924600 | -1.74627100 | 2.88086500  |
| H | -0.86520400 | -4.22499700 | 3.78552000  |
| H | -0.66058100 | -3.60706400 | 5.42183400  |
| C | 5.28733500  | -2.91170000 | 1.09463900  |
| H | 4.10641200  | -4.73289100 | 1.23267600  |
| H | 4.24826000  | -3.84549500 | 2.74837200  |
| H | 6.08475900  | -0.88790400 | 1.19131100  |
| H | 5.46663900  | -1.49729000 | 2.72415600  |
| H | 5.11285100  | 5.64093900  | -1.55728900 |
| H | 5.12306400  | 4.75378200  | -0.03606800 |
| H | -3.98904800 | 3.24927900  | 0.18568400  |
| H | -4.45778900 | 4.72377400  | 1.03427000  |
| H | -3.05566500 | -3.45741400 | 4.64981000  |
| H | -2.38913700 | -1.87168900 | 5.02905600  |
| H | 5.20801200  | -2.88349300 | -0.00120600 |
| H | 6.24077900  | -3.40067300 | 1.33204300  |
| C | -3.54157100 | 0.23090900  | -1.52335000 |
| O | -4.42659600 | -0.21138300 | -2.47100000 |
| N | -3.96172400 | 0.19268500  | -0.29888500 |
| C | -5.53765300 | -0.57140200 | -1.74878600 |
| C | -5.25917900 | -0.32343900 | -0.39784200 |
| C | -6.74069300 | -1.08875300 | -2.20753400 |
| C | -6.22528300 | -0.59844800 | 0.57385700  |
| C | -7.69702900 | -1.36028300 | -1.22596200 |
| H | -6.92422600 | -1.26983600 | -3.26121700 |
| C | -7.44354600 | -1.11934200 | 0.13780800  |
| H | -6.02839300 | -0.40886500 | 1.62452100  |
| H | -8.65948600 | -1.76688400 | -1.52314400 |
| H | -8.21817100 | -1.34514800 | 0.86529300  |
| H | -2.57283300 | 0.56881000  | -1.88378700 |
| S | -0.07359600 | 1.19918100  | -2.52512800 |
| C | -0.20564200 | -0.01031000 | -3.90446100 |
| H | -0.92541900 | -0.80210300 | -3.68138900 |
| H | -0.54701500 | 0.54517200  | -4.78398500 |
| H | 0.76124500  | -0.46586600 | -4.12853600 |
| C | 0.39223700  | -1.73804900 | -1.27145600 |
| C | 1.46020600  | -2.33775200 | -2.02032000 |
| C | -0.77423300 | -2.46763800 | -1.10675100 |
| C | 2.68455200  | -1.65665200 | -2.27856400 |
| C | 1.31487800  | -3.66985900 | -2.54716400 |
| C | -0.92803600 | -3.77385500 | -1.64151800 |
| H | -1.61214700 | -2.03825900 | -0.56329100 |
| C | 3.70962800  | -2.24664900 | -2.98713000 |
| H | 2.77990500  | -0.63772000 | -1.91353100 |
| C | 2.39284900  | -4.25379100 | -3.26886200 |

|    |             |             |             |
|----|-------------|-------------|-------------|
| C  | 0.09668500  | -4.36940800 | -2.33893700 |
| H  | -1.86655100 | -4.30385400 | -1.49110400 |
| C  | 3.56512900  | -3.56524500 | -3.48396200 |
| H  | 4.62856300  | -1.69688700 | -3.17575500 |
| H  | 2.26972400  | -5.26319300 | -3.65659800 |
| H  | -0.01127800 | -5.37360400 | -2.74320900 |
| H  | 4.37676300  | -4.02646600 | -4.04103500 |
| Pd | 0.54964400  | 0.15996200  | -0.45768300 |

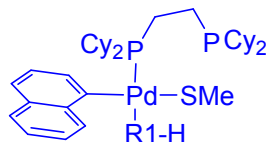

**Inter4b**

|   |             |             |             |
|---|-------------|-------------|-------------|
| P | -0.50982900 | 1.87149400  | 0.47498800  |
| P | 3.92893100  | 0.64361100  | 0.67773700  |
| C | 1.19367400  | 1.40109900  | 1.09395200  |
| C | -0.22580700 | 3.13537500  | -0.88624700 |
| C | -1.08091700 | 2.87707600  | 1.97435900  |
| C | 2.11669000  | 0.63575900  | 0.13281000  |
| C | 4.77973400  | 0.24451600  | -0.96919500 |
| C | 4.08715500  | -0.99132600 | 1.61877700  |
| H | 1.67341900  | 2.33552300  | 1.40931600  |
| H | 1.02662000  | 0.81483100  | 2.00271600  |
| C | -0.05597800 | 2.50664200  | -2.28689800 |
| C | 0.90320400  | 4.14585500  | -0.59326700 |
| H | -1.18128800 | 3.67400100  | -0.90865500 |
| C | -2.05262200 | 4.03254900  | 1.65908000  |
| C | -1.67444800 | 1.94543300  | 3.05443900  |
| H | -0.15722000 | 3.31600200  | 2.38182400  |
| H | 1.74603900  | -0.37989000 | -0.02384600 |
| H | 2.11757700  | 1.12398700  | -0.84660000 |
| C | 4.83154700  | 1.50355500  | -1.86252700 |
| C | 4.24395000  | -0.96508000 | -1.76062900 |
| H | 5.81870800  | 0.02610000  | -0.67902300 |
| C | 5.57313100  | -1.35856000 | 1.82698300  |
| C | 3.36966900  | -0.88594200 | 2.98333000  |
| H | 3.60400000  | -1.79331200 | 1.04156700  |
| C | 0.00529000  | 3.59888900  | -3.36853100 |
| H | -0.88980300 | 1.82520700  | -2.48686700 |
| H | 0.86264500  | 1.90659300  | -2.32917800 |
| C | 0.95976100  | 5.23320900  | -1.68171500 |
| H | 0.76368100  | 4.61407800  | 0.38933900  |
| H | 1.87138400  | 3.62808000  | -0.55797100 |
| C | -2.45052000 | 4.79509700  | 2.93550900  |
| H | -2.94239900 | 3.63351900  | 1.15977300  |
| H | -1.59540800 | 4.73582500  | 0.95438100  |
| C | -2.07252100 | 2.71915800  | 4.32258500  |
| H | -2.55915700 | 1.44312500  | 2.63921500  |
| H | -0.95856200 | 1.15677000  | 3.31476900  |
| C | 5.63919600  | 1.25734000  | -3.14868300 |
| H | 5.25986600  | 2.34379600  | -1.30187400 |
| H | 3.81042600  | 1.80338400  | -2.14291100 |
| C | 5.05512800  | -1.20603400 | -3.04717300 |
| H | 4.25887100  | -1.86936600 | -1.14101600 |
| H | 3.19264000  | -0.79641900 | -2.03018900 |
| C | 5.74735300  | -2.62343900 | 2.68619800  |
| H | 6.08674000  | -0.51714500 | 2.31649500  |
| H | 6.07084300  | -1.50763300 | 0.86138000  |
| C | 3.55289700  | -2.14974200 | 3.84094900  |
| H | 3.76293000  | -0.01603400 | 3.53022000  |
| H | 2.29837300  | -0.71201400 | 2.83461200  |
| C | 1.11348000  | 4.62333600  | -3.08254700 |
| H | -0.96563100 | 4.11278000  | -3.41094900 |
| H | 0.15812000  | 3.13660500  | -4.35221800 |
| H | 0.03619400  | 5.82906400  | -1.64430100 |
| H | 1.78718700  | 5.92291100  | -1.47115400 |
| C | -3.04299900 | 3.86329800  | 4.00014100  |
| H | -3.16592700 | 5.58618500  | 2.67752200  |
| H | -1.56459800 | 5.29879800  | 3.35134700  |
| H | -2.51912800 | 2.02817700  | 5.04913400  |

|    |             |             |             |
|----|-------------|-------------|-------------|
| H  | -1.16908900 | 3.13076400  | 4.79685900  |
| C  | 5.10287500  | 0.04895900  | -3.93040700 |
| H  | 6.69175800  | 1.07839700  | -2.88320000 |
| H  | 5.62480700  | 2.15715400  | -3.77767600 |
| H  | 6.08167900  | -1.49798300 | -2.77909000 |
| H  | 4.62583900  | -2.04917700 | -3.60392500 |
| C  | 5.03454900  | -2.49314500 | 4.03868100  |
| H  | 6.81636800  | -2.82631400 | 2.83306600  |
| H  | 5.33651200  | -3.48759500 | 2.14338800  |
| H  | 3.05908300  | -2.01134500 | 4.81203600  |
| H  | 3.04502700  | -2.99129100 | 3.34884500  |
| H  | 1.10639900  | 5.41460100  | -3.84292700 |
| H  | 2.09378700  | 4.12851100  | -3.15519700 |
| H  | -3.98909500 | 3.44251100  | 3.62888100  |
| H  | -3.28509700 | 4.42666100  | 4.91037600  |
| H  | 5.71930500  | -0.13298200 | -4.82032100 |
| H  | 4.08863900  | 0.27397700  | -4.29323000 |
| H  | 5.51727200  | -1.69930800 | 4.62814800  |
| H  | 5.13977900  | -3.42052300 | 4.61665800  |
| H  | -3.98030200 | -0.17254000 | -2.66111300 |
| C  | -4.03907800 | -1.07301500 | -2.06627500 |
| O  | -4.84535700 | -2.07312600 | -2.48444800 |
| N  | -3.44150200 | -1.28082200 | -0.92976800 |
| C  | -4.75302400 | -3.03134000 | -1.49711500 |
| C  | -3.87463500 | -2.55374800 | -0.51836400 |
| C  | -5.39676600 | -4.25804200 | -1.43467400 |
| C  | -3.60265000 | -3.33002400 | 0.61124600  |
| C  | -5.11783100 | -5.02546700 | -0.30299500 |
| H  | -6.07130900 | -4.59223000 | -2.21523200 |
| C  | -4.23934400 | -4.56742900 | 0.69692900  |
| H  | -2.91310200 | -2.98728400 | 1.37223700  |
| H  | -5.58941000 | -5.99752200 | -0.19280500 |
| H  | -4.04823200 | -5.19943000 | 1.55918000  |
| C  | -0.79460300 | -1.31274400 | 0.50738500  |
| C  | -0.13088600 | -2.20165800 | -0.40582700 |
| C  | -0.74032600 | -1.61495600 | 1.85968400  |
| C  | -0.10176600 | -1.96435900 | -1.81072400 |
| C  | 0.54387500  | -3.37459100 | 0.08655100  |
| C  | -0.08048000 | -2.77332600 | 2.35006400  |
| H  | -1.23589600 | -0.96875400 | 2.58036700  |
| C  | 0.54005400  | -2.82210800 | -2.67825100 |
| H  | -0.59719600 | -1.07282700 | -2.18560400 |
| C  | 1.19579600  | -4.24119100 | -0.83385300 |
| C  | 0.54551300  | -3.63906800 | 1.48277300  |
| H  | -0.07683900 | -2.97464600 | 3.41943300  |
| C  | 1.19569200  | -3.97635400 | -2.18472500 |
| H  | 0.54627000  | -2.61359900 | -3.74516200 |
| H  | 1.69898900  | -5.12526600 | -0.44730300 |
| H  | 1.04723600  | -4.53174500 | 1.85000800  |
| H  | 1.69840700  | -4.64969000 | -2.87425200 |
| S  | -3.49736900 | 1.97826000  | -1.05517200 |
| C  | -5.02928600 | 1.72078700  | -0.06668100 |
| H  | -5.81966900 | 2.35499300  | -0.48092200 |
| H  | -5.36649300 | 0.67911100  | -0.10101300 |
| H  | -4.88123500 | 1.99954900  | 0.98234000  |
| Pd | -1.99432400 | 0.22288800  | -0.17618700 |

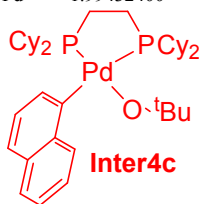

|   |             |             |             |
|---|-------------|-------------|-------------|
| P | -2.09822000 | 0.05469400  | -0.85375000 |
| P | 0.95132200  | 1.18134800  | -1.11579000 |
| C | -1.53415400 | 0.72256200  | -2.51371000 |
| C | -2.86786500 | -1.61374600 | -1.20167000 |
| C | -3.55506100 | 1.15152700  | -0.38817100 |
| C | -0.35621700 | 1.70900600  | -2.36950800 |
| C | 1.65971200  | 2.80205500  | -0.48970000 |
| C | 2.30306500  | 0.47756200  | -2.22048100 |
| H | -1.22130700 | -0.14403200 | -3.10668800 |

|   |             |             |             |
|---|-------------|-------------|-------------|
| H | -2.35829600 | 1.19888500  | -3.05939100 |
| C | -1.78766500 | -2.67042300 | -1.51650300 |
| C | -3.98614300 | -1.61584900 | -2.26396800 |
| H | -3.28828000 | -1.88824300 | -0.22523300 |
| C | -4.33642300 | 0.58873400  | 0.81857100  |
| C | -3.10146100 | 2.59968400  | -0.10775200 |
| H | -4.22770100 | 1.17238400  | -1.25986900 |
| H | 0.11779000  | 1.87967500  | -3.34411600 |
| H | -0.73101500 | 2.68039800  | -2.03094600 |
| C | 0.64864400  | 3.55186600  | 0.40366800  |
| C | 2.22496100  | 3.74496900  | -1.57305700 |
| H | 2.48594500  | 2.47879600  | 0.15838800  |
| C | 3.66074000  | 0.31422600  | -1.50444400 |
| C | 1.86077300  | -0.85171400 | -2.87079800 |
| H | 2.42977700  | 1.21564700  | -3.02792300 |
| C | -2.40907700 | -4.06517100 | -1.70235100 |
| H | -1.06684300 | -2.68635600 | -0.69365900 |
| H | -1.24240300 | -2.39782000 | -2.43298600 |
| C | -4.59201000 | -3.01987900 | -2.44189200 |
| H | -4.78011400 | -0.90769400 | -1.99775700 |
| H | -3.57678100 | -1.28118100 | -3.22882700 |
| C | -5.51048300 | 1.50164800  | 1.21138100  |
| H | -3.64874300 | 0.47200900  | 1.66424400  |
| H | -4.71778800 | -0.41337000 | 0.59342500  |
| C | -4.28053700 | 3.50508800  | 0.28693300  |
| H | -2.35900700 | 2.58970600  | 0.70151200  |
| H | -2.60478900 | 3.02308300  | -0.98934300 |
| C | 1.28568700  | 4.79945600  | 1.03762700  |
| H | 0.26172400  | 2.87873700  | 1.17683600  |
| H | -0.21634600 | 3.86673600  | -0.19687600 |
| C | 2.85166400  | 5.00329200  | -0.94388800 |
| H | 2.97759000  | 3.23330300  | -2.18331100 |
| H | 1.41770000  | 4.04805200  | -2.25603200 |
| C | 4.73178100  | -0.24479000 | -2.45783700 |
| H | 3.54516600  | -0.36304100 | -0.65257000 |
| H | 4.00074900  | 1.27452200  | -1.09943000 |
| C | 2.94381200  | -1.41001200 | -3.81080100 |
| H | 1.64800700  | -1.58405400 | -2.08269800 |
| H | 0.93009700  | -0.71188000 | -3.43517900 |
| C | -3.51522000 | -4.06405200 | -2.76729200 |
| H | -2.82950700 | -4.39692600 | -0.74226700 |
| H | -1.62503500 | -4.78667500 | -1.96558200 |
| H | -5.10784500 | -3.30815500 | -1.51438400 |
| H | -5.35547500 | -2.99586700 | -3.23033300 |
| C | -5.05029000 | 2.93905100  | 1.48759600  |
| H | -6.01648100 | 1.08617400  | 2.09184100  |
| H | -6.25292200 | 1.50922700  | 0.39899400  |
| H | -3.91057900 | 4.51462100  | 0.50795500  |
| H | -4.96405300 | 3.60316700  | -0.56972300 |
| C | 1.86265100  | 5.74063300  | -0.02996800 |
| H | 2.08751500  | 4.48732400  | 1.72222900  |
| H | 0.54072300  | 5.32549100  | 1.64801800  |
| H | 3.73472300  | 4.70731100  | -0.35922100 |
| H | 3.21194200  | 5.67131800  | -1.73674200 |
| C | 4.28907800  | -1.57129900 | -3.08990800 |
| H | 5.67177700  | -0.37835600 | -1.90828500 |
| H | 4.93428600  | 0.48875500  | -3.25327600 |
| H | 2.61011800  | -2.37113200 | -4.22243300 |
| H | 3.06820600  | -0.72899100 | -4.66627000 |
| H | -3.96656200 | -5.06096300 | -2.85036100 |
| H | -3.07546900 | -3.83700000 | -3.75041900 |
| H | -4.39869000 | 2.94756600  | 2.37340100  |
| H | -5.91076000 | 3.57779400  | 1.72406000  |
| H | 2.35269300  | 6.60073000  | 0.44337900  |
| H | 1.03989600  | 6.14519200  | -0.63843100 |
| H | 4.19005200  | -2.33094800 | -2.30202200 |
| H | 5.05313900  | -1.93497200 | -3.78878300 |
| O | -1.30917200 | -1.31932800 | 1.67602900  |
| C | -1.36972800 | -1.51455700 | 3.06822100  |
| C | -2.72935500 | -2.20360600 | 3.33701600  |
| H | -2.87434400 | -2.41388800 | 4.40473400  |
| H | -3.55509200 | -1.56877100 | 2.99610600  |
| H | -2.78081800 | -3.15175400 | 2.78939100  |
| C | -0.24735200 | -2.44195700 | 3.57991700  |
| H | -0.24544100 | -3.37599700 | 3.00654100  |

|    |             |             |             |
|----|-------------|-------------|-------------|
| H  | 0.73173600  | -1.97192400 | 3.46505100  |
| H  | -0.38549100 | -2.68987800 | 4.64115500  |
| C  | -1.32380800 | -0.17909300 | 3.84099200  |
| H  | -2.12750900 | 0.48532600  | 3.49970000  |
| H  | -1.44248600 | -0.32815500 | 4.92264500  |
| H  | -0.36622200 | 0.32337600  | 3.67062100  |
| C  | 1.67350200  | -0.33578300 | 1.55807200  |
| C  | 2.47163000  | -1.52514600 | 1.44369500  |
| C  | 2.12926800  | 0.66557200  | 2.40158000  |
| C  | 2.08896400  | -2.62190000 | 0.61927700  |
| C  | 3.70437400  | -1.64500100 | 2.17861800  |
| C  | 3.33406200  | 0.54419000  | 3.14278600  |
| H  | 1.54992700  | 1.57747800  | 2.52772100  |
| C  | 2.86951900  | -3.75230200 | 0.50327400  |
| H  | 1.14462800  | -2.55041900 | 0.08871600  |
| C  | 4.48810500  | -2.82372800 | 2.03842700  |
| C  | 4.11130300  | -0.58410500 | 3.03094200  |
| H  | 3.63929800  | 1.35487900  | 3.80166300  |
| C  | 4.08752700  | -3.85413200 | 1.21856000  |
| H  | 2.54570100  | -4.57507000 | -0.12955600 |
| H  | 5.41744800  | -2.89726000 | 2.59996000  |
| H  | 5.03921900  | -0.68261200 | 3.59021900  |
| H  | 4.69805700  | -4.74876100 | 1.12500100  |
| Pd | -0.09861800 | -0.11866900 | 0.50155500  |

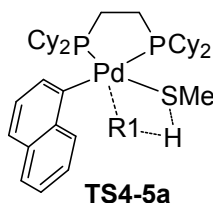

|   |             |             |             |
|---|-------------|-------------|-------------|
| P | 0.83633400  | -1.65694800 | -1.59458400 |
| P | 0.62423500  | 1.63082600  | -1.45714300 |
| C | 1.23901600  | -0.63560400 | -3.11556000 |
| C | 2.31323700  | -2.81449100 | -1.42922300 |
| C | -0.54906500 | -2.79537900 | -2.16456500 |
| C | 0.53881700  | 0.73267500  | -3.10629500 |
| C | -0.89481200 | 2.73546000  | -1.46967000 |
| C | 2.06149000  | 8.22268400  | -1.71162000 |
| H | 2.32560300  | -0.50028700 | -3.12557700 |
| H | 0.97797000  | -1.18601400 | -4.02761400 |
| C | 3.55279400  | -2.07245400 | -0.88471900 |
| C | 2.67567600  | -3.61289900 | -2.70035100 |
| H | 2.00024100  | -3.52965000 | -0.65422100 |
| C | -0.98289100 | -3.75843500 | -1.03863200 |
| C | -1.76705000 | -2.02414700 | -2.71664700 |
| H | -0.12663700 | -3.38689500 | -2.99100100 |
| H | 0.94917100  | 1.37823700  | -3.89271800 |
| H | -0.52520400 | 0.60286800  | -3.32463400 |
| C | -2.19691600 | 1.90999900  | -1.40408600 |
| C | -0.96082600 | 3.74903200  | -2.63379400 |
| H | -0.81204000 | 3.29233300  | -0.52607200 |
| C | 2.10883100  | 3.96019900  | -0.67011500 |
| C | 3.42235700  | 2.10054100  | -1.80035400 |
| H | 1.86214200  | 3.27271400  | -2.69646500 |
| C | 4.72310500  | -3.03899500 | -0.63293600 |
| H | 3.29264400  | -1.54606700 | 0.03935800  |
| H | 3.87302600  | -1.30590000 | -1.60545000 |
| C | 3.84966600  | -4.57588700 | -2.44359900 |
| H | 1.81428100  | -4.18395000 | -3.06431500 |
| H | 2.95486000  | -2.91551100 | -3.50364800 |
| C | -2.08949000 | -4.71588100 | -1.51328900 |
| H | -1.35632100 | -3.15826000 | -0.19975100 |
| H | -0.12680600 | -4.34050200 | -0.67326400 |
| C | -2.86475000 | -2.99249200 | -3.19261600 |
| H | -2.17744200 | -1.37774500 | -1.93334700 |
| H | -1.46528100 | -1.38653300 | -3.55773300 |
| C | -3.42269400 | 2.82549100  | -1.25453600 |
| H | -2.15667500 | 1.18520300  | -0.58708700 |
| H | -2.31178900 | 1.32493100  | -2.32814100 |
| C | -2.19583300 | 4.66020200  | -2.49668800 |
| H | -0.05917500 | 4.37025500  | -2.67609200 |

|   |             |             |             |
|---|-------------|-------------|-------------|
| H | -1.01879500 | 3.20806600  | -3.58956600 |
| C | 3.25709800  | 4.94057400  | -0.96780300 |
| H | 2.24616100  | 3.53432200  | 0.32817000  |
| H | 1.15844600  | 4.50492100  | -0.65085800 |
| C | 4.56824100  | 3.08944500  | -2.08186400 |
| H | 3.61611300  | 1.57990700  | -0.85537500 |
| H | 3.40191600  | 1.33800300  | -2.58855500 |
| C | 5.07925100  | -3.84175300 | -1.89196100 |
| H | 4.44718100  | -3.73136400 | 0.17544000  |
| H | 5.59604400  | -2.47665500 | -0.27773800 |
| H | 3.53147600  | -5.34378300 | -1.72357400 |
| H | 4.10194100  | -5.10397500 | -3.37205800 |
| C | -3.29564700 | -3.94746000 | -2.07105400 |
| H | -2.39827400 | -5.35625700 | -0.67748400 |
| H | -1.68900500 | -5.38566100 | -2.29011600 |
| H | -3.72542300 | -2.41517800 | -3.55358700 |
| H | -2.49446600 | -3.57489200 | -4.05061700 |
| C | -3.49884500 | 3.85505600  | -2.39081000 |
| H | -3.36755300 | 3.34916700  | -0.28907100 |
| H | -4.33133900 | 2.21278500  | -1.22359700 |
| H | -2.07952400 | 5.28226900  | -1.59721000 |
| H | -2.23759800 | 5.34994200  | -3.34960300 |
| C | 4.60909300  | 4.21864800  | -1.04323100 |
| H | 3.28088900  | 5.71750500  | -0.19381500 |
| H | 3.06425700  | 5.45360600  | -1.92234400 |
| H | 5.52231600  | 2.54718400  | -2.09850400 |
| H | 4.43677600  | 3.52168300  | -3.08522600 |
| H | 5.88242200  | -4.55681000 | -1.67404000 |
| H | 5.46937900  | -3.15814500 | -2.66098600 |
| H | -3.75594900 | -3.36314500 | -1.26417000 |
| H | -4.05594600 | -4.64850500 | -2.43887300 |
| H | -4.34919000 | 4.53219200  | -2.24083800 |
| H | -3.67929700 | 3.33242700  | -3.34221900 |
| H | 4.84822500  | 3.79621800  | -0.05712500 |
| H | 5.40877000  | 4.92935800  | -1.28733600 |
| C | -2.13572200 | -0.92950000 | 0.97717400  |
| O | -3.36067900 | -0.97781200 | 0.19456800  |
| N | -2.45040500 | -0.81614700 | 2.25185700  |
| C | -4.39205100 | -0.88534100 | 1.08021900  |
| C | -3.84147000 | -0.78848600 | 2.36717400  |
| C | -5.76143400 | -0.88070800 | 0.84056800  |
| C | -4.68256400 | -0.68382800 | 3.47860500  |
| C | -6.59423400 | -0.77536000 | 1.96063800  |
| H | -6.16440000 | -0.95798100 | -0.16530200 |
| C | -6.06248400 | -0.67846800 | 3.25808400  |
| H | -4.26857200 | -0.60966200 | 4.48058200  |
| H | -7.67277800 | -0.76956600 | 1.82386100  |
| H | -6.74036000 | -0.59899900 | 4.10442000  |
| H | -0.43313100 | -1.98382800 | 1.71214300  |
| C | 0.68855500  | 1.49993100  | 1.63885700  |
| C | 1.91857700  | 1.86854500  | 2.27861600  |
| C | -0.48345800 | 2.10505800  | 2.05368200  |
| C | 3.17093200  | 1.27479000  | 1.94768600  |
| C | 1.91068200  | 2.87253300  | 3.31253000  |
| C | -0.49094000 | 3.08480200  | 3.08078900  |
| H | -1.43138300 | 1.80353800  | 1.62128400  |
| C | 4.34191300  | 1.64960600  | 2.57196400  |
| H | 3.17796100  | 0.50545500  | 1.18114700  |
| C | 3.13630600  | 3.23965300  | 3.93410700  |
| C | 0.67928500  | 3.46947600  | 3.69146000  |
| H | -1.43738200 | 3.52742200  | 3.38286400  |
| C | 4.32663500  | 2.64854500  | 3.57552900  |
| H | 5.28077000  | 1.17465000  | 2.29800200  |
| H | 3.11371500  | 4.00101300  | 4.71117000  |
| H | 0.67901500  | 4.22413800  | 4.47484200  |
| H | 5.25255900  | 2.94038400  | 4.06419300  |
| S | 0.88295400  | -1.77979500 | 2.01440800  |
| C | 0.59568500  | -1.07908500 | 3.68971600  |
| H | 0.64000900  | -1.89335200 | 4.41657200  |
| H | 1.37807200  | -0.34814900 | 3.89589900  |
| H | -0.39056200 | -0.61233000 | 3.68483500  |

Pd 0.61962000 0.00702200 0.21418000

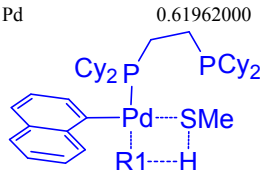

TS4-5b

|   |             |             |             |
|---|-------------|-------------|-------------|
| P | 0.30647500  | -1.45567600 | 0.45326000  |
| P | -4.26825100 | -0.92128600 | 0.68195400  |
| C | -1.45664300 | -1.25052500 | 1.04145300  |
| C | 0.29834700  | -2.84736600 | -0.80679300 |
| C | 1.05555900  | -2.20590100 | 2.01719700  |
| C | -2.49887500 | -0.74312200 | 0.03299000  |
| C | -5.23680300 | -0.92256800 | -0.94788300 |
| C | -4.63217100 | 0.80483700  | 1.36811500  |
| H | -1.76589700 | -2.22461800 | 1.44009500  |
| H | -1.39915000 | -0.57093500 | 1.89741300  |
| C | -0.01204300 | -2.36094900 | -2.24033200 |
| C | -0.57892800 | -4.06027000 | -0.43207900 |
| H | 1.34858400  | -3.16921500 | -0.81438200 |
| C | 2.29601100  | -3.08838200 | 1.76826300  |
| C | 1.38626500  | -1.09019700 | 3.03478200  |
| H | 0.26777000  | -2.84129100 | 2.45050100  |
| H | -2.27843000 | 0.28417900  | -0.26929700 |
| H | -2.46125400 | -1.35433900 | -0.87419400 |
| C | -5.11340200 | -2.29658400 | -1.64285400 |
| C | -4.94356200 | 0.22042700  | -1.93977700 |
| H | -6.28508500 | -0.83108000 | -0.62515600 |
| C | -6.14400700 | 0.96218400  | 1.64256900  |
| C | -3.82414900 | 1.04724400  | 2.66276500  |
| H | -4.32642200 | 1.56210000  | 0.63177100  |
| C | 0.15523300  | -3.50526800 | -3.25443200 |
| H | 0.65017800  | -1.52690100 | -2.49944300 |
| H | -1.03865300 | -1.97640700 | -2.29812800 |
| C | -0.41121800 | -5.19911800 | -1.45480400 |
| H | -0.33239700 | -4.42534400 | 0.57299300  |
| H | -1.63526500 | -3.76022900 | -0.40595900 |
| C | 2.86067600  | -3.65082400 | 3.08535700  |
| H | 3.06480900  | -2.49501300 | 1.25842300  |
| H | 2.05111300  | -3.92155100 | 1.10051600  |
| C | 1.94451600  | -1.66189100 | 4.34837100  |
| H | 2.12849500  | -0.41571900 | 2.58513500  |
| H | 0.49934000  | -0.48056600 | 3.24418500  |
| C | -6.00344700 | -2.38260200 | -2.89488500 |
| H | -5.37194900 | -3.09769400 | -0.93913700 |
| H | -4.06860500 | -2.46960100 | -1.94253000 |
| C | -5.83554400 | 0.12824000  | -3.19133800 |
| H | -5.08507500 | 1.19524100  | -1.45877000 |
| H | -3.89012200 | 0.18284500  | -2.24911000 |
| C | -6.48111300 | 2.30909400  | 2.30442300  |
| H | -6.47770100 | 0.14510000  | 2.30000800  |
| H | -6.71503600 | 0.86574100  | 0.71151600  |
| C | -4.17455200 | 2.38908800  | 3.32911900  |
| H | -4.02107900 | 0.22771500  | 3.37008300  |
| H | -2.75023700 | 1.03272100  | 2.44532900  |
| C | -0.70549900 | -4.72221800 | -2.88462900 |
| H | 1.21331700  | -3.80243600 | -3.28698600 |
| H | -0.10015900 | -3.14786700 | -4.25993800 |
| H | 0.61889900  | -5.58112400 | -1.40379200 |
| H | -1.06915500 | -6.03551800 | -1.18648100 |
| C | 3.17661000  | -2.54144800 | 4.09708200  |
| H | 3.75935700  | -4.24377800 | 2.87291600  |
| H | 2.12749900  | -4.34338200 | 3.52513100  |
| H | 2.19247600  | -0.83918500 | 5.03074700  |
| H | 1.16583700  | -2.25843200 | 4.84640900  |
| C | -5.71046000 | -1.23948700 | -3.87788800 |
| H | -7.05883000 | -2.33433400 | -2.58816400 |
| H | -5.86553800 | -3.35472800 | -3.38620500 |
| H | -6.88426300 | 0.29164400  | -2.90099600 |
| H | -5.57703400 | 0.93264900  | -3.89221600 |
| C | -5.67954000 | 2.51957200  | 3.59566500  |

|    |             |             |             |   |             |             |             |
|----|-------------|-------------|-------------|---|-------------|-------------|-------------|
| H  | -7.55871600 | 2.36174100  | 2.50788100  | H | 1.51240100  | 4.10432400  | 1.38412100  |
| H  | -6.25511400 | 3.12404500  | 1.60094300  | H | -2.86420700 | 2.19946900  | 2.57746400  |
| H  | -3.60897500 | 2.49362500  | 4.26436600  | H | -2.29219700 | 3.06995300  | 1.16220400  |
| H  | -3.84662100 | 3.20823500  | 2.67407700  | C | -3.18554600 | 2.34100200  | -1.47722200 |
| H  | -0.53685800 | -5.53869000 | -3.59802800 | C | -5.02841600 | 1.66248100  | 0.12931500  |
| H  | -1.76949900 | -4.45293000 | -2.96378800 | H | -3.87092500 | 0.34368200  | -1.13383100 |
| H  | 3.99419500  | -1.91622600 | 3.70892500  | C | -3.82960700 | -1.72499100 | 1.00723800  |
| H  | 3.53481600  | -2.97619900 | 5.03871200  | C | -2.22493800 | -1.08506300 | 2.86852300  |
| H  | -6.38653200 | -1.29731600 | -4.74074700 | H | -4.00339000 | -0.00476600 | 2.30538600  |
| H  | -4.68973500 | -1.35412000 | -4.27297500 | C | 2.91952200  | -0.65852200 | 3.80059100  |
| H  | -5.98563200 | 1.76774500  | 4.33850900  | H | 1.42573500  | -0.84211500 | 2.23441100  |
| H  | -5.90728500 | 3.50107800  | 4.03133400  | H | 0.87261500  | 0.01782200  | 3.67509200  |
| H  | 3.31239200  | 0.60511500  | -1.44844800 | C | 3.76128500  | 1.70032800  | 4.16953600  |
| C  | 2.92794200  | 1.91972600  | -1.08120900 | H | 2.87852500  | 3.19020200  | 2.86865000  |
| O  | 2.53437000  | 2.70211900  | -2.17029400 | H | 1.75760600  | 2.50879900  | 4.04495800  |
| N  | 3.78200800  | 2.53327900  | -0.29392100 | C | 3.08119900  | 4.61554200  | -0.87460600 |
| C  | 3.18440600  | 3.88768400  | -2.00868000 | H | 2.39054000  | 2.58028700  | -1.12747500 |
| C  | 3.96494200  | 3.79330100  | -0.84432800 | H | 3.37371200  | 2.82575400  | 0.31048600  |
| C  | 3.14189500  | 5.02157000  | -2.81234200 | C | 0.70823900  | 5.48953600  | -0.90471700 |
| C  | 4.75324500  | 4.87828900  | -0.43795400 | H | -0.09101400 | 3.48720900  | -1.14716600 |
| C  | 3.92921400  | 6.09422400  | -2.39317600 | H | -0.69282800 | 4.33813200  | 0.27487900  |
| H  | 2.52988500  | 5.06741600  | -3.70687800 | C | -4.23869500 | 2.68061500  | -2.54563100 |
| C  | 4.72085700  | 6.02403300  | -1.22727900 | H | -2.25045000 | 2.02333200  | -1.95066400 |
| H  | 5.36047100  | 4.81750000  | 0.45982100  | H | -2.95821000 | 3.25415400  | -0.90850100 |
| H  | 3.93280200  | 7.00876300  | -2.97973900 | C | -6.08115700 | 2.01584200  | -0.93793900 |
| H  | 5.31655600  | 6.88705200  | -0.94332000 | H | -5.41800600 | 0.86847600  | 0.77650000  |
| C  | 0.26400700  | 1.77662600  | 0.19748200  | H | -4.86157200 | 2.53956200  | 0.77180900  |
| C  | -0.64296500 | 2.35301500  | -0.74970400 | C | -4.50278300 | -2.73812400 | 1.95043500  |
| C  | 0.31801400  | 2.29475100  | 1.47845100  | H | -3.05245300 | -2.23227700 | 0.42425400  |
| C  | -0.75863600 | 1.88543700  | -2.08983600 | H | -4.56847200 | -1.35154200 | 0.28882000  |
| C  | -1.48004100 | 3.45339100  | -0.34727000 | C | -2.90213200 | -2.10512700 | 3.79985900  |
| C  | -0.50116100 | 3.38555000  | 1.87032300  | H | -1.36857900 | -1.55915900 | 2.37230300  |
| H  | 1.01444700  | 1.88493400  | 2.20471800  | H | -1.82672200 | -0.25725200 | 3.46812200  |
| C  | -1.64163900 | 2.45571000  | -2.98053700 | C | 3.41745400  | 0.36047300  | 4.83486400  |
| H  | -0.12195200 | 1.06173900  | -2.40014200 | H | 3.73549800  | -0.90626300 | 3.10766100  |
| C  | -2.38258600 | 4.01850500  | -1.29062800 | H | 2.63414200  | -1.59705300 | 4.29081700  |
| C  | -1.38133100 | 3.95365400  | 0.97853800  | H | 4.62135800  | 1.56141700  | 3.49862900  |
| H  | -0.42086300 | 3.77440700  | 2.88288600  | H | 4.06779700  | 2.43748900  | 4.92293700  |
| C  | -2.46545100 | 3.53487800  | -2.57674100 | C | 1.99901500  | 5.30719900  | -1.71455300 |
| H  | -1.70359800 | 2.08182700  | -3.99930300 | H | 3.98086400  | 4.44203900  | -1.47767900 |
| H  | -3.00759800 | 4.85145700  | -0.97508600 | H | 3.38047500  | 5.27826700  | -0.04857700 |
| H  | -2.00482500 | 4.79543300  | 1.27120900  | H | -0.07623800 | 5.93833200  | -1.52740900 |
| H  | -3.15790200 | 3.98179800  | -3.28550100 | H | 0.89345000  | 6.19319400  | -0.07928300 |
| S  | 3.63308200  | -0.99170000 | -1.33174900 | C | -5.57317000 | 3.09229300  | -1.90724000 |
| C  | 5.00051600  | -0.71566500 | -0.12777100 | H | -4.39511600 | 1.80242500  | -3.18827500 |
| H  | 4.90274900  | -1.38754200 | 0.72869900  | H | -3.86234500 | 3.48127700  | -3.19489400 |
| H  | 5.95125300  | -0.91133900 | -0.63010600 | H | -6.33507100 | 1.10777800  | -1.50388400 |
| H  | 4.97926400  | 0.32243900  | 0.21654500  | H | -7.00587200 | 2.34717700  | -0.44839800 |
| Pd | 1.60379200  | 0.34599300  | -0.34643600 | C | -3.52463700 | -3.26365800 | 3.00912000  |
|    |             |             |             | H | -4.90868500 | -3.56818500 | 1.35928300  |
|    |             |             |             | H | -5.35890600 | -2.25994700 | 2.45057800  |
|    |             |             |             | H | -2.16761500 | -2.48296500 | 4.52228800  |
|    |             |             |             | H | -3.68547000 | -1.59913300 | 4.38427300  |
|    |             |             |             | H | 4.29281400  | -0.03327700 | 5.36626300  |
|    |             |             |             | H | 2.63686100  | 0.52175500  | 5.59397700  |
|    |             |             |             | H | 1.78584200  | 4.69672200  | -2.60406400 |
|    |             |             |             | H | 2.35928200  | 6.27774800  | -2.07832700 |
|    |             |             |             | H | -6.32361400 | 3.28760500  | -2.68350100 |
|    |             |             |             | H | -5.43639800 | 4.03705900  | -1.35980300 |
|    |             |             |             | H | -2.72796100 | -3.83478200 | 2.51230700  |
|    |             |             |             | H | -4.03532500 | -3.95680100 | 3.68953100  |
|    |             |             |             | C | 1.60318300  | -0.20034700 | -1.14192400 |
|    |             |             |             | O | 1.84348900  | 0.27350100  | -2.43662100 |
|    |             |             |             | N | 2.64775800  | -0.79643600 | -0.62743600 |
|    |             |             |             | C | 3.13788000  | -0.07799000 | -2.72329900 |
|    |             |             |             | C | 3.64904400  | -0.74504100 | -1.60377800 |
|    |             |             |             | C | 3.86891900  | 0.15386900  | -3.87931000 |
|    |             |             |             | C | 4.96511500  | -1.21604700 | -1.61355400 |
|    |             |             |             | C | 5.18437500  | -0.32306200 | -3.88070500 |
|    |             |             |             | H | 3.44263700  | 0.67063500  | -4.73346100 |
|    |             |             |             | C | 5.72071800  | -0.99428400 | -2.76784700 |
|    |             |             |             | H | 5.37766900  | -1.73295900 | -0.75188100 |
|    |             |             |             | H | 5.80273300  | -0.17223500 | -4.76141300 |
|    |             |             |             | H | 6.74731900  | -1.34864300 | -2.80868500 |
|    |             |             |             | H | 3.06226500  | -2.46418700 | 0.73518500  |

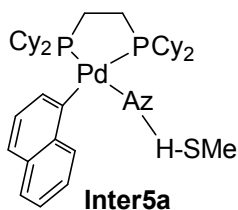

|   |             |             |             |
|---|-------------|-------------|-------------|
| P | 0.68352200  | 1.82202600  | 1.21634400  |
| P | -2.35178900 | 0.69234500  | 0.67104700  |
| C | -0.69499700 | 2.28820100  | 2.40499000  |
| C | 2.07838700  | 1.22861600  | 2.31864700  |
| C | 1.29068800  | 3.45769000  | 0.52175600  |
| C | -2.10403400 | 2.19060400  | 1.78654200  |
| C | -3.69424700 | 1.23947400  | -0.52167400 |
| C | -3.19851800 | -0.55483000 | 1.79376200  |
| H | -0.61248800 | 1.58960400  | 3.24344300  |
| H | -0.53070900 | 3.29252600  | 2.81483600  |
| C | 1.72724400  | -0.11449600 | 2.99493300  |
| C | 2.57729700  | 2.25546100  | 3.35621800  |
| H | 2.88648100  | 1.01519100  | 1.60564800  |
| C | 2.58483100  | 3.27681100  | -0.30225700 |
| C | 0.20608900  | 4.15491200  | -0.32670100 |



|    |             |             |             |
|----|-------------|-------------|-------------|
| S  | 3.50654900  | -3.59842600 | 1.33841800  |
| C  | 3.45228800  | -4.65927900 | -0.16050500 |
| H  | 4.08540600  | -4.24913200 | -0.95087100 |
| H  | 3.83553400  | -5.64104100 | 0.12894300  |
| H  | 2.42783100  | -4.76586100 | -0.52359500 |
| C  | -0.97532800 | -1.21902000 | -1.63872100 |
| C  | -0.97932600 | -2.62347800 | -1.34919000 |
| C  | -1.51205000 | -0.80205300 | -2.84544900 |
| C  | -0.39716700 | -3.15727300 | -0.16422100 |
| C  | -1.58371700 | -3.54920700 | -2.27214300 |
| C  | -2.09507300 | -1.71267300 | -3.76481900 |
| H  | -1.48522700 | 0.24990200  | -3.11953500 |
| C  | -0.42299500 | -4.50785900 | 0.11430900  |
| H  | 0.09613000  | -2.46811100 | 0.51509300  |
| C  | -1.60091800 | -4.93551900 | -1.95429000 |
| C  | -2.14247500 | -3.05752400 | -3.48142600 |
| H  | -2.50497700 | -1.33693200 | -4.70035100 |
| C  | -1.03937300 | -5.40823800 | -0.78964500 |
| H  | 0.04462300  | -4.88215000 | 1.02131800  |
| H  | -2.06494100 | -5.62285500 | -2.65909100 |
| H  | -2.59377300 | -3.76049700 | -4.17832300 |
| H  | -1.05851000 | -6.47188600 | -0.56548100 |
| Pd | -0.21503700 | 0.18707700  | -0.30939600 |

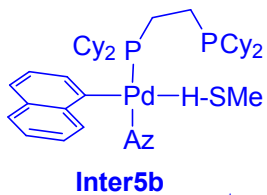

|   |             |             |             |
|---|-------------|-------------|-------------|
| P | -0.25836100 | 1.95916400  | 0.28173000  |
| P | 4.11504500  | 0.49654800  | 0.29236400  |
| C | 1.49031800  | 1.51774500  | 0.79034500  |
| C | -0.09130400 | 2.97039200  | -1.29752900 |
| C | -0.60405700 | 3.24716100  | 1.62666400  |
| C | 2.26058600  | 0.51770300  | -0.08644100 |
| C | 4.78675600  | -0.24887900 | -1.31621300 |
| C | 4.27677700  | -0.94741100 | 1.50728700  |
| H | 2.04659400  | 2.46008300  | 0.86320400  |
| H | 1.40536600  | 1.12948300  | 1.80996400  |
| C | -0.06692800 | 2.09554300  | -2.57125000 |
| C | 1.06707100  | 3.98908800  | -1.31321700 |
| H | -1.03622500 | 3.53080700  | -1.33094200 |
| C | -1.63370500 | 4.33088400  | 1.24707800  |
| C | -1.02574600 | 2.54315600  | 2.93665200  |
| H | 0.35621600  | 3.75312100  | 1.80867300  |
| H | 1.81963200  | -0.47915200 | -0.00993500 |
| H | 2.18886600  | 0.81366800  | -1.13752500 |
| C | 4.82295500  | 0.82611400  | -2.42497100 |
| C | 4.11443000  | -1.53857500 | -1.82610400 |
| H | 5.83498300  | -0.48378900 | -1.07614600 |
| C | 5.76282400  | -1.32611600 | 1.69241100  |
| C | 3.64673600  | -0.57603300 | 2.86807900  |
| H | 3.73634500  | -1.81962600 | 1.11169800  |
| C | -0.11288600 | 2.96737800  | -3.83746200 |
| H | -0.91124100 | 1.39642100  | -2.56132000 |
| H | 0.84326700  | 1.48226900  | -2.59131800 |
| C | 1.02112400  | 4.85779900  | -2.58352200 |
| H | 1.03567400  | 4.63108400  | -0.42391100 |
| H | 2.02739300  | 3.45697400  | -1.28050700 |
| C | -1.84814800 | 5.33020200  | 2.39866500  |
| H | -2.59246100 | 3.85872300  | 0.99535100  |
| H | -1.31190800 | 4.87701300  | 0.35386100  |
| C | -1.23778200 | 3.54513600  | 4.08323300  |
| H | -1.95851500 | 1.98980500  | 2.75682000  |
| H | -0.27866100 | 1.79769300  | 3.23256200  |
| C | 5.49015800  | 0.30045900  | -3.70779400 |
| H | 5.34784600  | 1.71936300  | -2.06379300 |
| H | 3.79753700  | 1.14370100  | -2.66818900 |
| C | 4.78511700  | -2.05911200 | -3.11055200 |
| H | 4.13985900  | -2.31852500 | -1.05662800 |
| H | 3.05277500  | -1.34798000 | -2.03226800 |

|    |             |             |             |
|----|-------------|-------------|-------------|
| C  | 5.96010600  | -2.42276300 | 2.75303800  |
| H  | 6.32763600  | -0.43023700 | 1.99180700  |
| H  | 6.19441300  | -1.66273700 | 0.74229100  |
| C  | 3.85580900  | -1.67132000 | 3.92778500  |
| H  | 4.08857200  | 0.36579700  | 3.22679800  |
| H  | 2.57159500  | -0.40218900 | 2.74941600  |
| C  | 1.02493700  | 3.99948100  | -3.85680600 |
| H  | -1.07991200 | 3.48986200  | -3.87827000 |
| H  | -0.06483800 | 2.32884800  | -4.72858900 |
| H  | 0.11190900  | 5.47676200  | -2.56515300 |
| H  | 1.87141300  | 5.55163000  | -2.58769000 |
| C  | -2.25591800 | 4.62807500  | 3.70097700  |
| H  | -2.60555900 | 6.06884000  | 2.10689800  |
| H  | -0.91551200 | 5.88891300  | 2.56552000  |
| H  | -1.56620100 | 3.01083200  | 4.98363200  |
| H  | -0.27763800 | 4.01977500  | 4.33935300  |
| C  | 4.81765300  | -0.98632800 | -4.20862300 |
| H  | 6.55187700  | 0.09799700  | -3.50267000 |
| H  | 5.46479700  | 1.07387000  | -4.48669900 |
| H  | 5.81480500  | -2.37209100 | -2.88104100 |
| H  | 4.25852100  | -2.95407300 | -3.46643700 |
| C  | 5.33820900  | -2.02658500 | 4.09844400  |
| H  | 7.03103000  | -2.63375000 | 2.87184900  |
| H  | 5.49503300  | -3.35494900 | 2.39962400  |
| H  | 3.42751100  | -1.34455600 | 4.88468800  |
| H  | 3.29759200  | -2.56883500 | 3.62647800  |
| H  | 0.94480200  | 4.63863600  | -4.74514500 |
| H  | 1.98874000  | 3.47455600  | -3.93505500 |
| H  | -3.24520100 | 4.16437300  | 3.56984400  |
| H  | -2.35958900 | 5.36029900  | 4.51152400  |
| H  | 5.33672300  | -1.36546500 | -5.09843200 |
| H  | 3.78754300  | -0.75796300 | -4.52097700 |
| H  | 5.87718700  | -1.15786800 | 4.50541400  |
| H  | 5.45600700  | -2.83828400 | 4.82807900  |
| H  | -4.23541600 | 0.71128600  | -1.53061500 |
| C  | -3.42751800 | -1.18370500 | -0.21818200 |
| O  | -3.47368300 | -2.38679700 | 0.46757400  |
| N  | -4.40235300 | -1.08525000 | -1.09715300 |
| C  | -4.55116700 | 3.06860300  | -0.03290500 |
| C  | -5.14284400 | -2.26428200 | -1.01407800 |
| C  | -5.02750300 | -4.32288700 | 0.32179200  |
| C  | -6.27611700 | -2.71443600 | -1.69674600 |
| C  | -6.16118600 | -4.76441800 | -0.36685600 |
| H  | -4.54461900 | -4.92310100 | 1.08604000  |
| C  | -6.77309900 | -3.97395500 | -1.35707200 |
| H  | -6.74685700 | -2.10486200 | -2.46236700 |
| H  | -6.57759700 | -5.74028800 | -0.13287700 |
| H  | -7.65233500 | -4.35590800 | -1.86885700 |
| S  | -3.67603000 | 1.86646500  | -1.01063500 |
| C  | -4.97803000 | 2.09309400  | 0.26875200  |
| H  | -5.23972100 | 1.12161400  | 0.69120600  |
| H  | -4.58645500 | 2.74235000  | 1.05370300  |
| H  | -5.85616900 | 2.56017000  | -0.18262200 |
| C  | -0.82895200 | -1.20832700 | 0.87228000  |
| C  | -0.20215900 | -2.20889500 | 0.06035300  |
| C  | -0.70220800 | -1.28604800 | 2.24709000  |
| C  | -0.29105800 | -2.21502300 | -1.36068000 |
| C  | 0.55080200  | -3.26261700 | 0.68956800  |
| C  | 0.03245700  | -2.33054000 | 2.86649200  |
| H  | -1.18933400 | -0.55187900 | 2.88310900  |
| C  | 0.32041300  | -3.18917900 | -2.11987900 |
| H  | -0.86919700 | -1.42904300 | -1.83846200 |
| C  | 1.17297400  | -4.25094100 | -0.12249300 |
| C  | 0.64737600  | -3.29835900 | 2.10650900  |
| H  | 0.09901500  | -2.36364700 | 3.95177800  |
| C  | 1.06346500  | -4.21989200 | -1.49442100 |
| H  | 0.22749900  | -3.17241300 | -3.20276300 |
| H  | 1.73511300  | -5.04416600 | 0.36637500  |
| H  | 1.20396300  | -4.10624000 | 2.57632400  |
| H  | 1.54003800  | -4.98743600 | -2.09888500 |
| Pd | -1.98884300 | 0.25459500  | 0.06886200  |

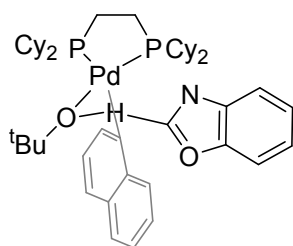

**Inter5c**

|   |             |             |             |
|---|-------------|-------------|-------------|
| P | 0.54159800  | 2.24799200  | 0.93299700  |
| P | 1.31249100  | -0.84811700 | 1.65774800  |
| C | 1.45459100  | 1.89740800  | 2.53570200  |
| C | 1.55063000  | 3.59989500  | 0.11026600  |
| C | -1.03458900 | 3.11289600  | 1.47467800  |
| C | 1.24853200  | 0.45098000  | 3.02101500  |
| C | 0.21273400  | -2.22064400 | 2.31514800  |
| C | 3.05866100  | -1.53062900 | 1.82337300  |
| H | 2.51709000  | 2.07760700  | 2.34093500  |
| H | 1.15464100  | 2.60244200  | 3.32085300  |
| C | 2.91452400  | 3.06760500  | -0.37992200 |
| C | 1.73436100  | 4.88929500  | 0.93856500  |
| H | 0.95914000  | 3.84099600  | -0.78373200 |
| C | -1.79516600 | 3.69957100  | 0.26504900  |
| C | -1.94386800 | 2.16730200  | 2.28971700  |
| H | -0.73050800 | 3.93954800  | 2.13555600  |
| H | 1.97957000  | 0.20005500  | 3.79937600  |
| H | 0.25890500  | 0.35794900  | 3.47883000  |
| C | -1.26516700 | -1.77987900 | 2.38686800  |
| C | 0.64974900  | -2.83259700 | 3.66418700  |
| H | 0.28377200  | -2.99455500 | 1.53835100  |
| C | 3.25951500  | -2.88181600 | 1.10427700  |
| C | 4.11986100  | -0.50468700 | 1.37190500  |
| H | 3.19466300  | -1.69669500 | 2.90333500  |
| C | 3.68509100  | 4.14071800  | -1.16778400 |
| H | 2.76307600  | 2.17856000  | -1.00155700 |
| H | 3.52515700  | 2.75581700  | 0.48012300  |
| C | 2.51322100  | 5.95777200  | 0.14932700  |
| H | 0.76434600  | 5.29826200  | 1.24352900  |
| H | 2.28338900  | 4.65640200  | 1.86291700  |
| C | -3.11062900 | 4.37252600  | 0.69314500  |
| H | -1.98837500 | 2.89677300  | -0.45505600 |
| H | -1.16972500 | 4.43415100  | -0.25703300 |
| C | -3.24767300 | 2.86394000  | 2.71574200  |
| H | -2.19200400 | 1.28426200  | 1.68774600  |
| H | -1.41743600 | 1.81119000  | 3.18501400  |
| C | -2.17407900 | -2.96098800 | 2.76256000  |
| H | -1.59344700 | -1.34142200 | 1.44045700  |
| H | -1.38252300 | -0.99621900 | 3.14906300  |
| C | -0.26390700 | -4.00955300 | 4.05549200  |
| H | 1.68843800  | -3.17894900 | 3.62564200  |
| H | 0.60195100  | -2.06398100 | 4.44969100  |
| C | 4.69029500  | -3.41231800 | 1.30368600  |
| H | 3.06492300  | -2.75900300 | 0.03433800  |
| H | 2.54168800  | -3.62427200 | 1.47102600  |
| C | 5.54813600  | -1.04802600 | 1.55539100  |
| H | 3.95520400  | -0.26188500 | 0.31537800  |
| H | 4.01290700  | 0.43151100  | 1.93356900  |
| C | 3.86459300  | 5.42676700  | -0.34858100 |
| H | 3.13536000  | 4.37002600  | -2.09188300 |
| H | 4.66083100  | 3.74372200  | -1.47571300 |
| H | 1.90894500  | 6.27700000  | -0.71232800 |
| H | 2.65761900  | 6.84739100  | 0.77584700  |
| C | -4.00370200 | 3.42402700  | 1.50395900  |
| H | -3.64195700 | 4.73064200  | -0.19771800 |
| H | -2.88403200 | 5.26259200  | 1.30039800  |
| H | -3.87764000 | 2.15237400  | 3.26409000  |
| H | -3.01481100 | 3.68304300  | 3.41347200  |
| C | -1.74417200 | -3.60277500 | 4.08947900  |
| H | -2.13668000 | -3.71342700 | 1.96159600  |
| H | -3.21359100 | -2.61609100 | 2.81754500  |

|    |             |             |             |
|----|-------------|-------------|-------------|
| H  | -0.12725600 | -4.82210800 | 3.32712500  |
| H  | 0.04715100  | -4.40821400 | 5.02979400  |
| C  | 5.73900000  | -2.39251700 | 0.84005300  |
| H  | 4.80724700  | -4.35624100 | 0.75721800  |
| H  | 4.85150500  | -3.64278400 | 2.36792500  |
| H  | 6.27054100  | -0.30922700 | 1.18522800  |
| H  | 5.75288900  | -1.17442900 | 2.62921600  |
| H  | 4.37598400  | 6.19167000  | -0.94648600 |
| H  | 4.51358600  | 5.21971300  | 0.51582600  |
| H  | -4.32491700 | 2.58836100  | 0.86741700  |
| H  | -4.91378900 | 3.94402600  | 1.82962300  |
| H  | -2.37012700 | -4.47538600 | 4.31552500  |
| H  | -1.90273200 | -2.88387300 | 4.90748100  |
| H  | 5.64158800  | -2.24497800 | -0.24467800 |
| H  | 6.75138100  | -2.77645300 | 1.01896900  |
| C  | -3.43210600 | -0.05477700 | -1.02898400 |
| O  | -4.31171300 | 0.22748300  | -2.06968100 |
| N  | -3.87295200 | -0.41768300 | 0.13541000  |
| C  | -5.43069400 | -0.76321600 | -1.48354200 |
| C  | -5.16869000 | -0.88562900 | -0.11212600 |
| C  | -6.62759000 | -1.13747800 | -2.07749500 |
| C  | -6.14609800 | -1.40932700 | 0.73848100  |
| C  | -7.59563800 | -1.66035400 | -1.21618500 |
| H  | -6.79768000 | -1.03095700 | -3.14361200 |
| C  | -7.35854000 | -1.79330400 | 0.16497200  |
| H  | -5.96175400 | -1.50969400 | 1.80372500  |
| H  | -8.55350800 | -1.97187400 | -1.62305700 |
| H  | -8.14080200 | -2.20505100 | 0.79661800  |
| H  | -2.45329200 | 0.36322200  | -1.28912500 |
| C  | -0.52628100 | 1.29463000  | -3.13629600 |
| C  | 0.57335600  | -1.67119500 | -1.29680700 |
| C  | 1.68999500  | -2.04708100 | -2.11678900 |
| C  | -0.50753400 | -2.53538500 | -1.23507500 |
| C  | 2.85049900  | -1.23154500 | -2.25355900 |
| C  | 1.66466200  | -3.28948700 | -2.84557600 |
| C  | -0.53816800 | -3.75674400 | -1.95693700 |
| H  | -1.38017700 | -2.27675300 | -0.64082400 |
| C  | 3.91726200  | -1.60426700 | -3.04333600 |
| H  | 2.87192700  | -0.28850900 | -1.71480000 |
| C  | 2.78079100  | -3.64747700 | -3.65178900 |
| C  | 0.52498000  | -4.13023500 | -2.74511500 |
| H  | -1.41594800 | -4.39573600 | -1.88493700 |
| C  | 3.88323800  | -2.82961900 | -3.75228500 |
| H  | 4.78458300  | -0.95428400 | -3.13026700 |
| H  | 2.74434500  | -4.58899600 | -4.19630800 |
| H  | 0.50820500  | -5.06499000 | -3.30124300 |
| H  | 4.72529900  | -3.11880300 | -4.37591400 |
| Pd | 0.48662700  | 0.13117000  | -0.29007000 |
| O  | -0.67144600 | 1.10749000  | -1.74345400 |
| C  | -0.87857300 | 0.02694400  | -3.94500900 |
| H  | -0.17798900 | -0.78343500 | -3.73205300 |
| H  | -1.88684100 | -0.31981900 | -3.69294100 |
| H  | -0.85080200 | 0.22759100  | -5.02445200 |
| C  | -1.52089700 | 2.41533000  | -3.52405300 |
| H  | -1.29530200 | 3.33307400  | -2.96869900 |
| H  | -1.47508900 | 2.64118600  | -4.59728800 |
| H  | -2.54762300 | 2.11561100  | -3.28437700 |
| C  | 0.89719300  | 1.75431600  | -3.50437500 |
| H  | 1.62745700  | 0.98328300  | -3.24070800 |
| H  | 0.99248600  | 1.95628000  | -4.57940300 |
| H  | 1.15007900  | 2.67429600  | -2.96341700 |

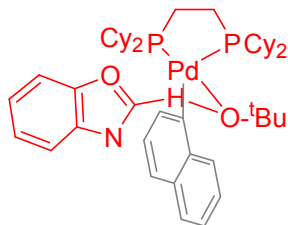

**Inter5c'**

|   |            |             |             |
|---|------------|-------------|-------------|
| P | 0.46699100 | 2.16339700  | -0.91015900 |
| P | 2.41331200 | -0.46825900 | -1.01947600 |



|   |             |             |             |
|---|-------------|-------------|-------------|
| C | -4.39699500 | 0.19040900  | -2.20458600 |
| H | -5.93056600 | -0.67548400 | -0.96932800 |
| C | -5.91246200 | 1.19174600  | 1.26794600  |
| C | -3.65236700 | 1.26550400  | 2.41529200  |
| H | -4.01958900 | 1.66709400  | 0.33147300  |
| C | 0.39568900  | -3.76308300 | -2.93278500 |
| H | 1.10076700  | -1.87221800 | -2.14266000 |
| H | -0.66471700 | -2.07002400 | -2.10399200 |
| C | -0.48662000 | -5.35108800 | -1.16940100 |
| H | -0.47900500 | -4.55896100 | 0.84988500  |
| H | -1.62420700 | -3.77502600 | -0.23142300 |
| C | 2.33600100  | -4.21413300 | 3.67060100  |
| H | 3.00628300  | -3.00486200 | 2.00414200  |
| H | 1.89646800  | -4.29211900 | 1.55564400  |
| C | 1.44964000  | -2.17208900 | 4.86831600  |
| H | 2.09873000  | -0.90564500 | 3.23568500  |
| H | 0.38222400  | -0.77652200 | 3.59937100  |
| C | -5.52944600 | -2.40538400 | -3.09759100 |
| H | -5.15623700 | -3.01263100 | -1.04111900 |
| H | -3.71580200 | -2.54492200 | -1.93781700 |
| C | -5.15870100 | 0.06089100  | -3.53683100 |
| H | -4.52202900 | 1.20383900  | -1.80599400 |
| H | -3.32196400 | 0.06629400  | -2.39533500 |
| C | -6.23887100 | 2.58761700  | 1.82659600  |
| H | -6.31108700 | 0.42868600  | 1.95336300  |
| H | -6.43343100 | 1.05382400  | 0.31277000  |
| C | -3.99098600 | 2.65889300  | 2.97232800  |
| H | -3.92160300 | 0.50223500  | 3.16101800  |
| H | -2.56895100 | 1.19905100  | 2.26580800  |
| C | -0.62204500 | -4.86918100 | -2.62053700 |
| H | 1.41218800  | -4.17909700 | -2.87961700 |
| H | 0.26135100  | -3.39963600 | -3.95992700 |
| H | 0.49030800  | -5.83928500 | -1.03884500 |
| C | -1.24837300 | -6.10821500 | -0.94253700 |
| H | 2.59016100  | -3.19586200 | 4.78990700  |
| H | 3.18278400  | -4.90662100 | 3.58342700  |
| H | 1.45796900  | -4.82530700 | 3.92789300  |
| H | 1.66810500  | -1.41151600 | 5.62882600  |
| H | 0.52615500  | -2.67727900 | 5.18812000  |
| C | -5.05502300 | -1.35775500 | -4.11487400 |
| H | -6.60551700 | -2.26969000 | -2.91303500 |
| H | -5.40809400 | -3.41748700 | -3.50533100 |
| H | -6.21851500 | 0.30705400  | -3.37251700 |
| H | -4.77676000 | 0.79577800  | -4.25773000 |
| C | -5.50262000 | 2.85245100  | 3.14615900  |
| H | -7.32371900 | 2.68624900  | 1.96434900  |
| H | -5.94630600 | 3.35024600  | 1.08965700  |
| H | -3.47055900 | 2.81007300  | 3.92693500  |
| H | -3.60364400 | 3.42141200  | 2.28235200  |
| H | -0.49651400 | -5.71194100 | -3.31251300 |
| H | -1.64069700 | -4.48356200 | -2.77928000 |
| H | 3.53568400  | -2.66963900 | 4.59283500  |
| H | 2.71116900  | -3.70864100 | 5.75253200  |
| H | -5.63664700 | -1.43562000 | -5.04249000 |
| H | -4.00790200 | -1.56307400 | -4.38373000 |
| H | -5.87441100 | 2.15808300  | 3.91456600  |
| H | -5.72011600 | 3.86580800  | 3.50823200  |
| H | 3.17941000  | 0.36546700  | -2.74631000 |
| C | 3.31205500  | 1.32347100  | -2.26704300 |
| O | 3.90507400  | 2.33054600  | -2.94578700 |
| N | 2.98944100  | 1.60145700  | -1.03997600 |
| C | 3.96856200  | 3.37012100  | -2.04012800 |
| C | 3.39181700  | 2.93051600  | -0.84324700 |
| C | 4.49863800  | 4.63781700  | -2.22595600 |
| C | 3.32223600  | 3.78795500  | 0.25742600  |
| C | 4.42652600  | 5.48695200  | -1.12021500 |
| H | 4.93911800  | 4.94378700  | -3.16848200 |
| C | 3.85008700  | 5.06807200  | 0.09393600  |
| H | 2.86260200  | 3.46930900  | 1.18519800  |
| H | 4.82392100  | 6.49447000  | -1.20025000 |
| H | 3.81191400  | 5.76499800  | 0.92598400  |
| C | 0.70669400  | 1.49256900  | 0.82890500  |
| C | -0.12999700 | 2.33419900  | 0.01708400  |
| C | 0.87963100  | 1.84242200  | 2.15965500  |
| C | -0.37673800 | 2.06565800  | -1.36113500 |

|    |             |             |             |
|----|-------------|-------------|-------------|
| C  | -0.74611000 | 3.50463500  | 0.58657200  |
| C  | 0.27386600  | 2.99598900  | 2.72401700  |
| H  | 1.51687600  | 1.23879800  | 2.79904400  |
| C  | -1.17528500 | 2.88477800  | -2.13038900 |
| H  | 0.07889700  | 1.18114300  | -1.79744000 |
| C  | -1.56641300 | 4.32932800  | -0.23288400 |
| C  | -0.51951500 | 3.81453800  | 1.95442800  |
| H  | 0.44771900  | 3.23132200  | 3.77207400  |
| C  | -1.77904100 | 4.03165600  | -1.56000900 |
| H  | -1.34509600 | 2.65080400  | -3.17829900 |
| H  | -2.02288400 | 5.21125800  | 0.21211400  |
| H  | -0.98278000 | 4.70280400  | 2.37778100  |
| H  | -2.40646600 | 4.67473800  | -2.17181100 |
| C  | 4.38241300  | -1.74540500 | -0.84195000 |
| Pd | 1.85103700  | 0.02820300  | -0.00590700 |
| O  | 3.06727900  | -1.32280800 | -1.10674600 |
| C  | 4.94853800  | -1.15974900 | 0.47052500  |
| H  | 5.97615900  | -1.49893400 | 0.65744500  |
| H  | 4.95505800  | -0.06450100 | 0.42682700  |
| H  | 4.33393900  | -1.45735500 | 1.32775400  |
| C  | 4.41816400  | -3.29125700 | -0.77513000 |
| H  | 4.02949400  | -3.70911100 | -1.71150400 |
| H  | 5.43476900  | -3.67812900 | -0.62319300 |
| H  | 3.79212700  | -3.65892400 | 0.04327600  |
| C  | 5.31556500  | -1.31402800 | -2.00329300 |
| H  | 6.31686900  | -1.75327400 | -1.90707400 |
| H  | 4.89203600  | -1.63988200 | -2.96111300 |
| H  | 5.43679600  | -0.22484700 | -2.03183400 |

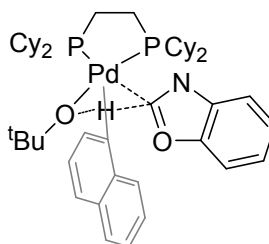

**TS5-6c**

|   |             |             |             |
|---|-------------|-------------|-------------|
| P | 0.74224600  | -1.56390000 | -1.44733900 |
| P | 0.52173200  | 1.72389000  | -1.44438400 |
| C | 1.15824100  | -0.61156900 | -3.01118000 |
| C | 2.25111900  | -2.63878500 | -1.12186700 |
| C | -0.56763500 | -2.78721600 | -2.01399800 |
| C | 0.44909200  | 0.75276700  | -3.05317600 |
| C | -1.02144400 | 2.79322200  | -1.49922500 |
| C | 1.93418700  | 2.93020000  | -1.75137200 |
| H | 2.24382600  | -0.47228600 | -3.02820800 |
| H | 0.89898800  | -1.19476400 | -3.90305900 |
| C | 3.47409400  | -1.78297000 | -0.72852600 |
| C | 2.61469500  | -3.62972100 | -2.24842600 |
| H | 1.95839100  | -3.20600300 | -0.22824600 |
| C | -0.96507900 | -3.75830800 | -0.88086200 |
| C | -1.81096100 | -2.08766700 | -2.60410800 |
| H | -0.10230800 | -3.36889500 | -2.82418700 |
| H | 0.85109600  | 1.37168200  | -3.86505400 |
| H | -0.61447500 | 0.60462500  | -3.26374600 |
| C | -2.30514200 | 1.94689700  | -1.35928300 |
| C | -1.12199800 | 3.72571200  | -2.72689800 |
| H | -0.93592800 | 3.41095200  | -0.59499600 |
| C | 1.96305200  | 4.11233200  | -0.76023900 |
| C | 3.30573400  | 2.22576500  | -1.81699600 |
| H | 1.72083000  | 3.33263600  | -2.75385500 |
| C | 4.68417700  | -2.65665300 | -0.35746000 |
| H | 3.20882500  | -1.13537000 | 0.11249600  |
| H | 3.75752100  | -1.12502800 | -1.56313900 |
| C | 3.83156200  | -4.49384200 | -1.87017700 |
| H | 1.76754800  | -4.28465200 | -2.47919900 |
| H | 2.84303400  | -3.07247200 | -3.16931000 |
| C | -2.01618500 | -4.77459900 | -1.36022700 |
| H | -1.36860600 | -3.18018000 | -0.04259700 |

|   |             |             |             |
|---|-------------|-------------|-------------|
| H | -0.08388900 | -4.29319200 | -0.50540600 |
| C | -2.85489000 | -3.11659100 | -3.07556700 |
| H | -2.25931600 | -1.44372700 | -1.84065700 |
| H | -1.52445600 | -1.45457500 | -3.45428400 |
| C | -3.55133900 | 2.84256000  | -1.26551100 |
| H | -2.24112000 | 1.29033700  | -0.48776700 |
| H | -2.41280500 | 1.28820000  | -2.23311300 |
| C | -2.37769600 | 4.61420300  | -2.64216800 |
| H | -0.23470900 | 4.36275900  | -2.81532500 |
| H | -1.17210000 | 3.12233600  | -3.64496300 |
| C | 3.09874000  | 5.09478800  | -1.09725100 |
| H | 2.10216000  | 3.73278600  | 0.25635300  |
| H | 1.00507000  | 4.64421100  | -0.76863700 |
| C | 4.43638700  | 3.22033600  | -2.13697700 |
| H | 3.50867300  | 1.74371000  | -0.85397900 |
| H | 3.29435000  | 1.43413600  | -2.57616200 |
| C | 5.04355200  | -3.63645300 | -1.48257100 |
| H | 4.45211800  | -3.22090600 | 0.55692000  |
| H | 5.54215800  | -2.01522000 | -0.11845900 |
| H | 3.56064300  | -5.14226300 | -1.02424400 |
| H | 4.08335800  | -5.15992800 | -2.70540200 |
| C | -3.25145100 | -4.07663300 | -1.94525600 |
| H | -2.30486400 | -5.42195600 | -0.52265100 |
| H | -1.57130100 | -5.43087500 | -2.12421300 |
| H | -3.73868100 | -2.58977800 | -3.45828700 |
| H | -2.44567700 | -3.69405100 | -3.91878800 |
| C | -3.65894500 | 3.78547400  | -2.47189300 |
| H | -3.50093300 | 3.43545200  | -0.34085300 |
| H | -4.44524600 | 2.21341200  | -1.18154300 |
| H | -2.27212200 | 5.29888900  | -1.78804400 |
| H | -2.44155400 | 5.24245600  | -3.53993200 |
| C | 4.46030200  | 4.38845900  | -1.14214000 |
| H | 3.11063100  | 5.90286700  | -0.35563000 |
| H | 2.90072500  | 5.56584300  | -2.07217000 |
| H | 5.39809700  | 2.69167400  | -2.13318100 |
| H | 4.29874000  | 3.61185500  | -3.15611200 |
| H | 5.88076400  | -4.27723300 | -1.17833900 |
| H | 5.38552600  | -3.07132200 | -2.36279800 |
| H | -3.75401200 | -3.51037700 | -1.15020400 |
| H | -3.97014600 | -4.82009900 | -2.31338500 |
| H | -4.52603400 | 4.44916900  | -2.36474500 |
| H | -3.82995700 | 3.19195500  | -3.38268300 |
| H | 4.70310100  | 4.00749300  | -0.14021100 |
| H | 5.25083500  | 5.09994800  | -1.41218400 |
| C | -1.92848100 | -0.83579000 | 1.42372100  |
| O | -2.91480200 | -1.09354700 | 0.39717700  |
| N | -2.52312500 | -0.39339400 | 2.50381400  |
| C | -4.12331600 | -0.77291300 | 0.94038300  |
| C | -3.89393600 | -0.33881000 | 2.25432300  |
| C | -5.38931600 | -0.82919900 | 0.36822600  |
| C | -4.97015700 | 0.05572600  | 3.05498900  |
| C | -6.45837400 | -0.43009600 | 1.17859400  |
| H | -5.54260900 | -1.16953600 | -0.65198900 |
| C | -6.25095700 | 0.00425700  | 2.49973500  |
| H | -4.80601500 | 0.39034800  | 4.07535300  |
| H | -7.46877100 | -0.45903700 | 0.77862500  |
| H | -7.10706200 | 0.30462400  | 3.09858800  |
| H | -0.32166600 | -1.53087700 | 1.72913700  |
| C | 0.54751400  | 1.74377600  | 1.62807600  |
| C | 1.78772900  | 2.10985300  | 2.24908800  |
| C | -0.61039300 | 2.38181200  | 2.03065500  |
| C | 3.03264100  | 1.50306200  | 1.91595200  |
| C | 1.79962600  | 3.13290300  | 3.26410900  |
| C | -0.59861200 | 3.37942800  | 3.03912000  |
| H | -1.56671300 | 2.09491400  | 1.60916700  |
| C | 4.21340400  | 1.88033600  | 2.51972300  |
| H | 3.02983200  | 0.71729800  | 1.16754900  |
| C | 3.03397900  | 3.49930500  | 3.86865400  |
| C | 0.57977800  | 3.75438200  | 3.63921400  |
| H | -1.53697800 | 3.84136700  | 3.33702900  |
| C | 4.21625500  | 2.89409000  | 3.50819400  |
| H | 5.14533100  | 1.39316300  | 2.24363800  |
| H | 3.02423500  | 4.27383200  | 4.63282800  |
| H | 0.59513600  | 4.52215400  | 4.40952400  |
| H | 5.14917700  | 3.18602500  | 3.98322300  |

|    |             |             |            |
|----|-------------|-------------|------------|
| C  | 1.02466700  | -2.01084000 | 3.19154000 |
| Pd | 0.47414500  | 0.19572800  | 0.26745300 |
| O  | 0.68382400  | -1.67793700 | 1.82092800 |
| C  | 0.35132400  | -3.35610000 | 3.51364700 |
| H  | 0.66979600  | -4.12601300 | 2.80142200 |
| H  | 0.61016000  | -3.69178400 | 4.52514800 |
| H  | -0.73853300 | -3.26066200 | 3.45582600 |
| C  | 2.54799900  | -2.14808500 | 3.24247400 |
| H  | 3.03089300  | -1.19655500 | 2.99695700 |
| H  | 2.87312300  | -2.44405900 | 4.24660400 |
| H  | 2.89230400  | -2.91061700 | 2.53366100 |
| C  | 0.53752000  | -0.92354600 | 4.15889500 |
| H  | 0.74311000  | -1.21927900 | 5.19555900 |
| H  | 1.05057800  | 0.02221700  | 3.96456000 |
| H  | -0.53832000 | -0.75633500 | 4.04614200 |

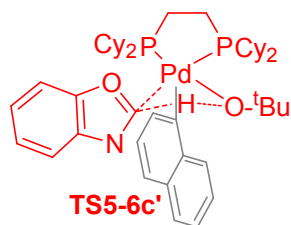

|   |             |             |             |
|---|-------------|-------------|-------------|
| P | 0.98365500  | -1.74533700 | -1.57109400 |
| P | 0.80135100  | 1.53423200  | -1.39131400 |
| C | 1.03168000  | -0.73819900 | -3.15722600 |
| C | 2.48915100  | -2.85254500 | -1.72994000 |
| C | -0.48637800 | -2.88748800 | -1.80620400 |
| C | 0.41735600  | 0.66133900  | -3.01311500 |
| C | -0.67405300 | 2.67580400  | -1.17826800 |
| C | 2.23073100  | 2.67152900  | -1.82972800 |
| H | 2.08499900  | -0.65433100 | -3.44122000 |
| H | 0.53184000  | -1.28106400 | -3.96855300 |
| C | 3.79808900  | -2.03751700 | -1.64114200 |
| C | 2.48530500  | -3.75309500 | -2.98424300 |
| H | 2.46074100  | -3.47164700 | -0.82285200 |
| C | -0.48420700 | -4.03583700 | -0.77450300 |
| C | -1.81610300 | -2.10708100 | -1.74153300 |
| H | -0.39060800 | -3.31767700 | -2.81514600 |
| H | 0.72464600  | 1.30662000  | -3.84575700 |
| H | -0.67359500 | 0.58894000  | -3.05976400 |
| C | -1.97409800 | 1.88453100  | -0.91124600 |
| C | -0.88797600 | 3.68156100  | -2.33137000 |
| H | -0.43920000 | 3.23596300  | -0.26461700 |
| C | 2.46513700  | 3.79517100  | -0.79736400 |
| C | 3.53074200  | 1.88112800  | -2.09043800 |
| H | 1.92549900  | 3.13640400  | -2.77997600 |
| C | 5.03166100  | -2.95541100 | -1.68625000 |
| H | 3.80347700  | -1.46054700 | -0.71089700 |
| H | 3.86442100  | -1.32073700 | -2.47337700 |
| C | 3.72708800  | -4.66278800 | -3.02021800 |
| H | 1.58224100  | -4.37365900 | -3.01651300 |
| H | 2.47383100  | -3.13237600 | -3.89317100 |
| C | -1.69385400 | -4.96498800 | -0.97449600 |
| H | -0.50708100 | -3.60113100 | 0.23072100  |
| H | 0.44175700  | -4.61655500 | -0.84620700 |
| C | -3.02565600 | -3.03837900 | -1.93555000 |
| H | -1.88321800 | -1.61032500 | -0.76522300 |
| H | -1.84069800 | -1.31997700 | -2.50674700 |
| C | -3.14245800 | 2.83399400  | -0.59523500 |
| H | -1.82471100 | 1.16843000  | -0.09590400 |
| H | -2.23840500 | 1.29101400  | -1.79751100 |
| C | -2.06810400 | 4.62487900  | -2.02920900 |
| H | 0.01323000  | 4.27963100  | -2.50641000 |
| H | -1.09336100 | 3.13692700  | -3.26398300 |
| C | 3.61996700  | 4.71581700  | -1.22922200 |
| H | 2.69957300  | 3.35147200  | 0.17514000  |
| H | 1.55524000  | 4.39109700  | -0.66043900 |
| C | 4.68348000  | 2.81201500  | -2.50506300 |
| H | 3.80956100  | 1.33711800  | -1.17993000 |

|    |             |             |             |
|----|-------------|-------------|-------------|
| H  | 3.37185500  | 1.12959400  | -2.87282300 |
| C  | 5.02724500  | -3.85229300 | -2.93152000 |
| H  | 5.04022700  | -3.57591700 | -0.78169000 |
| H  | 5.94381300  | -2.34507800 | -1.65898800 |
| H  | 3.67951400  | -5.36503500 | -2.17613400 |
| H  | 3.71277600  | -5.26874900 | -3.93577900 |
| C  | -3.01965000 | -4.19227500 | -0.92325400 |
| H  | -1.68106900 | -5.75099300 | -0.20915200 |
| H  | -1.60891100 | -5.47406100 | -1.94681500 |
| H  | -3.95431900 | -2.45901100 | -1.85117300 |
| H  | -3.00562700 | -3.44998500 | -2.95596000 |
| C  | -3.35865200 | 3.85185500  | -1.72393800 |
| H  | -2.93255600 | 3.36685700  | 0.34349000  |
| H  | -4.05584400 | 2.25019700  | -0.42640400 |
| H  | -1.80856500 | 5.25427100  | -1.16568100 |
| H  | -2.21974100 | 5.30488000  | -2.87703200 |
| C  | 4.91185300  | 3.92403100  | -1.47278600 |
| H  | 3.77899200  | 5.48092200  | -0.45940000 |
| H  | 3.34003400  | 5.25045300  | -2.14982100 |
| H  | 5.59700200  | 2.21983200  | -2.64144300 |
| H  | 4.45376600  | 3.26286500  | -3.48230800 |
| H  | 5.89359800  | -4.52592400 | -2.91957100 |
| H  | 5.12821700  | -3.22909800 | -3.83367500 |
| H  | -3.16214800 | -3.78563600 | 0.08826900  |
| H  | -3.86409700 | -4.86720400 | -1.11295200 |
| H  | -4.16354200 | 4.54898600  | -1.45991900 |
| H  | -3.68827600 | 3.32259300  | -2.63046000 |
| H  | 5.24543200  | 3.47760900  | -0.52553300 |
| H  | 5.71311000  | 4.59464000  | -1.80779300 |
| C  | 2.38082000  | -2.31751700 | 1.91841700  |
| O  | 3.04112600  | -1.84867200 | 3.09113900  |
| N  | 3.01116500  | -3.35912900 | 1.42327500  |
| C  | 4.11428900  | -2.66523200 | 3.27902100  |
| C  | 4.10824500  | -3.61559700 | 2.24699500  |
| C  | 5.08080100  | -2.63106100 | 4.27709400  |
| C  | 5.10579600  | -4.59487900 | 2.19694400  |
| C  | 6.07563700  | -3.61237300 | 4.21361200  |
| H  | 5.06121300  | -1.88250800 | 5.06325000  |
| C  | 6.08677600  | -4.57825500 | 3.19111700  |
| H  | 5.10798400  | -5.34660200 | 1.41212200  |
| H  | 6.85477400  | -3.62998100 | 4.97143600  |
| H  | 6.87459100  | -5.32733700 | 3.17879300  |
| H  | 0.78765200  | -1.95915900 | 1.85725400  |
| C  | 1.14125200  | 1.43124700  | 1.65137600  |
| C  | 2.43289800  | 1.72111900  | 2.20586600  |
| C  | 0.04295500  | 2.11346600  | 2.14132500  |
| C  | 3.62498300  | 1.07628500  | 1.76938400  |
| C  | 2.55180400  | 2.70929700  | 3.24725800  |
| C  | 0.15743700  | 3.07344900  | 3.18091900  |
| H  | -0.94898600 | 1.90594400  | 1.75153600  |
| C  | 4.85607600  | 1.39156400  | 2.30178700  |
| H  | 3.54152200  | 0.29837500  | 1.01742800  |
| C  | 3.83609700  | 3.00882000  | 3.77918700  |
| C  | 1.38657300  | 3.37010500  | 3.71899600  |
| H  | -0.73737300 | 3.57170000  | 3.54765900  |
| C  | 4.96498600  | 2.37197000  | 3.31712900  |
| H  | 5.74516000  | 0.87035900  | 1.95721800  |
| H  | 3.90853900  | 3.75624100  | 4.56657400  |
| H  | 1.48537300  | 4.10995900  | 4.51014000  |
| H  | 5.93895400  | 2.61147000  | 3.73599700  |
| C  | -0.99856300 | -1.71335600 | 2.90300800  |
| Pd | 0.95227500  | -0.06969400 | 0.24513100  |
| O  | -0.20746600 | -1.64314600 | 1.70074700  |
| C  | -1.23139600 | -3.20046100 | 3.23038900  |
| H  | -0.27580300 | -3.71035000 | 3.39364000  |
| H  | -1.83887700 | -3.31340500 | 4.13700200  |
| H  | -1.74969100 | -3.70201700 | 2.40536200  |
| C  | -0.28445200 | -1.02564400 | 4.07818600  |
| H  | -0.11438800 | 0.03197900  | 3.86261300  |
| H  | -0.88766000 | -1.10262900 | 4.99169200  |
| H  | 0.68758800  | -1.49085300 | 4.26800600  |
| C  | -2.33565000 | -1.02714500 | 2.60254300  |
| H  | -3.00577300 | -1.08033700 | 3.46887400  |
| H  | -2.18015700 | 0.02837000  | 2.35673000  |
| H  | -2.83399700 | -1.51022200 | 1.75385200  |

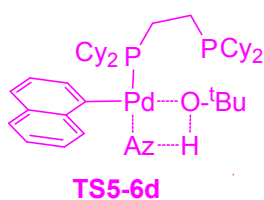

|   |             |             |             |
|---|-------------|-------------|-------------|
| P | -0.25544500 | -1.73430500 | -0.59195000 |
| P | 4.18388600  | -0.55692400 | -0.22421500 |
| C | 1.51873400  | -1.24555700 | -0.93156000 |
| C | -0.21337900 | -3.02690900 | 0.77065300  |
| C | -0.58098000 | -2.71147100 | -2.17999500 |
| C | 2.33873900  | -0.60877700 | 0.20205000  |
| C | 4.94976500  | -0.52327200 | 1.50847600  |
| C | 4.42975000  | 1.22254200  | -0.81518700 |
| H | 2.02014200  | -2.15764100 | -1.27702100 |
| H | 1.48049300  | -0.56994800 | -1.79127300 |
| C | -0.24803400 | -2.41304100 | 2.19006800  |
| C | 0.92266100  | -4.06265400 | 0.62293100  |
| H | -1.17087800 | -3.54805300 | 0.64476700  |
| C | -1.69717800 | -0.56994800 | -2.08878700 |
| C | -0.84930800 | -1.77071100 | -3.37464500 |
| H | 0.36439100  | -3.24145100 | -2.37295900 |
| H | 1.95098500  | 0.38069500  | 0.45767100  |
| H | 2.26469300  | -1.22239100 | 1.10502300  |
| C | 4.91592800  | -1.93682600 | 2.13062300  |
| C | 4.40451600  | 0.52420900  | 2.49961900  |
| H | 6.00899900  | -0.29082700 | 1.31997900  |
| C | 5.93691900  | 1.51730200  | -0.98188900 |
| C | 3.68673600  | 1.45382100  | -2.14960800 |
| H | 4.01344800  | 1.91896600  | -0.07303300 |
| C | -0.32473600 | -3.51675000 | 3.26008900  |
| H | -1.11771900 | -1.75411400 | 2.27600700  |
| H | 0.64886300  | -1.80450000 | 2.36492900  |
| C | 0.82307500  | -5.15252300 | 1.70555200  |
| H | 0.90119500  | -4.52770600 | -0.37092600 |
| H | 1.89674000  | -3.56379000 | 0.71308800  |
| C | -1.82568800 | -4.55614200 | -3.40716300 |
| H | -2.65142500 | -3.27753500 | -1.86572100 |
| H | -1.50469500 | -4.47310100 | -1.27122900 |
| C | -0.96579900 | -2.55393200 | -4.69269700 |
| H | -1.78944400 | -1.23361000 | -3.19027900 |
| H | -0.06652200 | -1.00942500 | -3.46204400 |
| C | 5.65126400  | -1.98569600 | 3.48113700  |
| H | 5.35371700  | -2.66251800 | 1.43390500  |
| H | 3.87197900  | -2.24785400 | 2.28925600  |
| C | 5.14337600  | 0.46870200  | 3.84949300  |
| H | 4.48398100  | 1.53230300  | 2.07656200  |
| H | 3.33366700  | 0.34687500  | 2.67143500  |
| C | 6.19810700  | 2.91622300  | -1.56587600 |
| H | 6.37843400  | 0.76113200  | -1.64834400 |
| H | 6.45525700  | 1.42443900  | -0.01980100 |
| C | 3.95887400  | 2.85184400  | -2.73118700 |
| H | 4.00268300  | 0.69147100  | -2.87781300 |
| H | 2.60652200  | 1.33453100  | -2.00834800 |
| C | 0.80577000  | -4.54482900 | 3.11517900  |
| H | -1.29429600 | -4.02840000 | 3.17425800  |
| H | -0.30235300 | -3.06016500 | 4.25752400  |
| H | -0.09688500 | -5.73472500 | 1.54942100  |
| H | 1.66014200  | -5.85422600 | 1.59834400  |
| C | -2.05681300 | -3.62982900 | -4.60906800 |
| H | -2.64389100 | -5.28198300 | -3.32002100 |
| H | -0.90697600 | -5.13921700 | -3.56919600 |
| H | -1.17556600 | -1.85885800 | -5.51538500 |
| H | 0.00043600  | -3.02722000 | -4.92166900 |
| C | 5.10296400  | -0.93881400 | 4.46159100  |
| H | 6.72250900  | -1.79948800 | 3.31373600  |
| H | 5.57352600  | -2.99209800 | 3.91286000  |
| H | 6.19174900  | 0.76735000  | 3.69967500  |
| H | 4.70765600  | 1.19941900  | 4.54335400  |
| C | 5.46052300  | 3.11855200  | -2.89607700 |
| H | 7.27768800  | 3.06598600  | -1.69799100 |

|    |             |             |             |   |             |             |             |
|----|-------------|-------------|-------------|---|-------------|-------------|-------------|
| H  | 5.86218200  | 3.67741600  | -0.84629300 | C | 1.02971200  | 3.49809500  | 0.91412700  |
| H  | 3.44011200  | 2.95739400  | -3.69264900 | C | -2.19869400 | 1.83651300  | 2.16926100  |
| H  | 3.52702700  | 3.60661900  | -2.05916700 | C | -3.86067700 | 1.05651200  | -0.14333600 |
| H  | 0.70030600  | -5.33680100 | 3.86743800  | C | -3.06685500 | -0.97304600 | 1.87732700  |
| H  | 1.77222300  | -4.05567900 | 3.31007600  | H | -0.58791000 | 1.24037600  | 3.49592200  |
| H  | -3.03750500 | -3.14251500 | -4.50757300 | H | -0.65618800 | 2.97056600  | 3.20275700  |
| H  | -2.09147000 | -4.21360200 | -5.53742800 | C | 1.80761500  | -0.23623200 | 3.04317700  |
| H  | 5.67028200  | -0.96264200 | 5.40087000  | C | 2.56052400  | 2.15100300  | 3.49881200  |
| H  | 4.06330600  | -1.19213400 | 4.71814200  | H | 2.84631200  | 1.03329500  | 1.66814400  |
| H  | 5.87361000  | 2.42963300  | -3.64808600 | C | 2.30372800  | 3.53284400  | 0.04212000  |
| H  | 5.62964900  | 4.13458000  | -3.27570800 | C | -0.13705000 | 4.19614200  | 0.18360700  |
| N  | -3.24467100 | 2.25217000  | 1.58717600  | H | 1.22685700  | 4.05542900  | 1.84195300  |
| C  | -3.86062100 | 3.39480100  | 1.10219500  | H | -2.90314300 | 1.67889900  | 2.99555900  |
| C  | -3.55244300 | 1.29417400  | 0.74965800  | H | -2.50218400 | 2.76430900  | 1.67453900  |
| C  | -4.55997300 | 3.06307900  | -0.07130500 | C | -3.51760900 | 2.32739200  | -0.95032100 |
| C  | -3.88131900 | 4.71122000  | 1.58355100  | C | -5.17908200 | 1.25420100  | 0.63486600  |
| O  | -4.37629200 | 1.73641700  | -0.30245700 | H | -3.99827000 | 0.24413500  | -0.87073000 |
| C  | -5.29719500 | 3.98426700  | -0.80867100 | C | -3.69659200 | -2.06621800 | 0.98683400  |
| C  | -4.61198900 | 5.64676600  | 0.85810500  | C | -1.96896700 | -1.57388300 | 2.78228900  |
| H  | -3.34337100 | 4.97833500  | 2.48759600  | H | -3.85395300 | -0.55845700 | 2.52573800  |
| C  | -5.30798200 | 5.28914700  | -0.31674300 | C | 3.05555500  | -0.75723900 | 3.77481100  |
| H  | -5.83022000 | 3.70204900  | -1.71067300 | H | 1.52947200  | -0.95336900 | 2.26582400  |
| H  | -4.65096000 | 6.67766700  | 1.19874500  | H | 0.97697400  | -0.17995900 | 3.76226600  |
| H  | -5.86672400 | 6.05186000  | -0.85221300 | C | 3.80691300  | 1.61407800  | 4.22602100  |
| O  | -3.37660000 | -1.26727500 | 1.19108100  | H | 2.79491100  | 3.12463200  | 3.05359200  |
| C  | -0.80387000 | 1.35456600  | -0.84772500 | H | 1.76403900  | 2.32596700  | 4.23751900  |
| C  | -0.04757700 | 2.25201600  | -0.02440500 | C | 2.66978900  | 4.97198500  | -0.36008900 |
| C  | -0.97007500 | 1.64363900  | -2.18988600 | H | 2.13420600  | 2.93738400  | -0.86285000 |
| C  | 0.14943200  | 2.04593900  | 1.37078200  | H | 3.14799300  | 3.07390600  | 0.56953500  |
| C  | 0.52592000  | 3.43135300  | -0.61852500 | C | 0.23124200  | 5.63297500  | -0.22638000 |
| C  | -0.41287000 | 2.81419400  | -2.76772400 | H | -0.39843000 | 3.61517800  | -0.71135700 |
| H  | -1.55322900 | 0.98364100  | -2.82425900 | H | -1.03024600 | 4.21932700  | 0.82023600  |
| C  | 0.88328200  | 2.92908300  | 2.13257300  | C | -4.66543700 | 2.70858500  | -1.90005100 |
| H  | -0.30962300 | 1.17757800  | 1.83311400  | H | -2.59209300 | 2.17372100  | -1.51361900 |
| C  | 1.27807500  | 4.32207500  | 0.19661400  | H | -3.33681700 | 3.16840000  | -0.26558200 |
| C  | 0.32266900  | 3.68667000  | -2.00128200 | C | -6.32942000 | 1.64947900  | -0.30954100 |
| H  | -0.57580400 | 3.01450100  | -3.82416500 | H | -5.45364700 | 0.34429900  | 1.18010500  |
| C  | 1.45883900  | 4.07861700  | 1.53949500  | H | -5.04445000 | 2.04367700  | 1.38873800  |
| H  | 1.01059300  | 2.75015500  | 3.19685300  | C | -4.22209400 | -3.24238100 | 1.82858100  |
| H  | 1.70277400  | 5.21164200  | -0.26392900 | H | -2.94640700 | -2.43486100 | 0.27889800  |
| H  | 0.75341200  | 4.58420300  | -2.43872600 | H | -4.51730800 | -1.65215800 | 0.38989700  |
| H  | 2.03254100  | 4.77236800  | 2.14862700  | C | -2.49768300 | -2.75705100 | 3.61113400  |
| C  | -4.53490800 | -2.05246600 | 0.92294500  | H | -1.13322400 | -1.91134500 | 2.15590800  |
| C  | -4.16450600 | -3.53877600 | 1.05734600  | H | -1.56754200 | -0.80912100 | 3.45845700  |
| H  | -3.74687300 | -3.73420200 | 2.05138500  | C | 3.55513800  | 0.22949800  | 4.83752300  |
| H  | -5.04115400 | -4.18425100 | 0.91907000  | H | 3.84361900  | -0.94054700 | 3.03319100  |
| H  | -3.41784900 | -3.82156600 | 0.30828800  | H | 2.82848700  | -1.73022800 | 4.22776100  |
| C  | -5.59566400 | -1.69554300 | 1.98452600  | H | 4.63782800  | 1.54795500  | 3.50845800  |
| H  | -5.88332700 | -0.64116100 | 1.90168900  | H | 4.11743000  | 2.32852700  | 4.99954800  |
| H  | -6.50103800 | -2.30530300 | 1.87194400  | C | 1.50699000  | 5.66985600  | -1.07901600 |
| H  | -5.18942200 | -1.85700100 | 2.98876700  | H | 3.56066400  | 4.95669800  | -1.00000700 |
| C  | -5.09603700 | -1.77146800 | -0.48446900 | H | 2.93912700  | 5.54584400  | 0.53947700  |
| H  | -5.98063600 | -2.38640200 | -0.69273400 | H | -0.60734800 | 6.08589400  | -0.77068900 |
| H  | -5.38106900 | -0.71929200 | -0.58844100 | H | 0.38123600  | 6.24035300  | 0.67878500  |
| H  | -4.34052500 | -1.99150400 | -1.24786500 | C | -5.98667700 | 2.89415000  | -1.14009300 |
| Pd | -1.86426800 | -0.14427300 | -0.03224400 | H | -4.78330100 | 1.91869900  | -2.65555500 |
| H  |             | -3.62837800 | 0.04162300  | H | -4.40596000 | 3.62585600  | -2.44389700 |

1.05330700

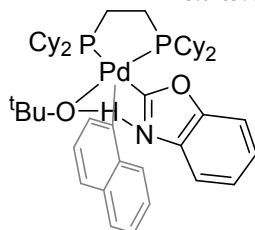

**Inter6c**

|   |             |            |            |
|---|-------------|------------|------------|
| P | 0.58153900  | 1.74717900 | 1.43159400 |
| P | -2.39942500 | 0.47432100 | 0.88246100 |
| C | -0.76755700 | 1.99152600 | 2.72044300 |
| C | 2.06114500  | 1.15775400 | 2.42742600 |

|   |             |             |             |
|---|-------------|-------------|-------------|
| C | 1.02971200  | 3.49809500  | 0.91412700  |
| C | -2.19869400 | 1.83651300  | 2.16926100  |
| C | -3.86067700 | 1.05651200  | -0.14333600 |
| C | -3.06685500 | -0.97304600 | 1.87732700  |
| H | -0.58791000 | 1.24037600  | 3.49592200  |
| H | -0.65618800 | 2.97056600  | 3.20275700  |
| C | 1.80761500  | -0.23623200 | 3.04317700  |
| C | 2.56052400  | 2.15100300  | 3.49881200  |
| H | 2.84631200  | 1.03329500  | 1.66814400  |
| C | 2.30372800  | 3.53284400  | 0.04212000  |
| C | -0.13705000 | 4.19614200  | 0.18360700  |
| H | 1.22685700  | 4.05542900  | 1.84195300  |
| H | -2.90314300 | 1.67889900  | 2.99555900  |
| H | -2.50218400 | 2.76430900  | 1.67453900  |
| C | -3.51760900 | 2.32739200  | -0.95032100 |
| C | -5.17908200 | 1.25420100  | 0.63486600  |
| H | -3.99827000 | 0.24413500  | -0.87073000 |
| C | -3.69659200 | -2.06621800 | 0.98683400  |
| C | -1.96896700 | -1.57388300 | 2.78228900  |
| H | -3.85395300 | -0.55845700 | 2.52573800  |
| C | 3.05555500  | -0.75723900 | 3.77481100  |
| H | 1.52947200  | -0.95336900 | 2.26582400  |
| H | 0.97697400  | -0.17995900 | 3.76226600  |
| C | 3.80691300  | 1.61407800  | 4.22602100  |
| H | 2.79491100  | 3.12463200  | 3.05359200  |
| H | 1.76403900  | 2.32596700  | 4.23751900  |
| C | 2.66978900  | 4.97198500  | -0.36008900 |
| H | 2.13420600  | 2.93738400  | -0.86285000 |
| H | 3.14799300  | 3.07390600  | 0.56953500  |
| C | 0.23124200  | 5.63297500  | -0.22638000 |
| H | -0.39843000 | 3.61517800  | -0.71135700 |
| H | -1.03024600 | 4.21932700  | 0.82023600  |
| C | -4.66543700 | 2.70858500  | -1.90005100 |
| H | -2.59209300 | 2.17372100  | -1.51361900 |
| H | -3.33681700 | 3.16840000  | -0.26558200 |
| C | -6.32942000 | 1.64947900  | -0.30954100 |
| H | -5.45364700 | 0.34429900  | 1.18010500  |
| H | -5.04445000 | 2.04367700  | 1.38873800  |
| C | -4.22209400 | -3.24238100 | 1.82858100  |
| H | -2.94640700 | -2.43486100 | 0.27889800  |
| H | -4.51730800 | -1.65215800 | 0.38989700  |
| C | -2.49768300 | -2.75705100 | 3.61113400  |
| H | -1.13322400 | -1.91134500 | 2.15590800  |
| H | -1.56754200 | -0.80912100 | 3.45845700  |
| C | 3.55513800  | 0.22949800  | 4.83752300  |
| H | 3.84361900  | -0.94054700 | 3.03319100  |
| H | 2.82848700  | -1.73022800 | 4.22776100  |
| H | 4.63782800  | 1.54795500  | 3.50845800  |
| H | 4.11743000  | 2.32852700  | 4.99954800  |
| C | 1.50699000  | 5.66985600  | -1.07901600 |
| H | 3.56066400  | 4.95669800  | -1.00000700 |
| H | 2.93912700  | 5.54584400  | 0.53947700  |
| H | -0.60734800 | 6.08589400  | -0.77068900 |
| H | 0.38123600  | 6.24035300  | 0.67878500  |
| C | -5.98667700 | 2.89415000  | -1.14009300 |
| H | -4.78330100 | 1.91869900  | -2.65555500 |
| H | -4.40596000 | 3.62585600  | -2.44389700 |
| H | -6.53997200 | 0.80861800  | -0.98632100 |
| H | -7.24411400 | 1.81778400  | 0.27323800  |
| C | -3.12224000 | -3.83725200 | 2.71834100  |
| H | -4.63097100 | -4.01091900 | 1.16111000  |
| H | -5.05567900 | -2.89815000 | 2.45996100  |
| H | -1.67901500 | -3.17770400 | 4.20851200  |
| H | -3.25230300 | -2.39295700 | 4.32484700  |
| H | 4.47104000  | -0.14731900 | 5.31052700  |
| H | 2.80437600  | 0.31897700  | 5.63764600  |
| H | 1.31757400  | 5.16285500  | -2.03614800 |
| H | 1.77321200  | 6.70695400  | -1.31935800 |
| H | -6.80129300 | 3.11866200  | -1.84006800 |
| H | -5.90065300 | 3.76382100  | -0.47125500 |
| H | -2.34332000 | -4.27725000 | 2.08006100  |
| H | -3.52709700 | -4.65118000 | 3.33313600  |
| C | 1.42928100  | 0.22636200  | -1.36408300 |
| O | 1.47806300  | 1.02857600  | -2.50858500 |
| N | 2.55296600  | -0.41656100 | -1.16535000 |



|    |             |             |             |   |             |             |             |
|----|-------------|-------------|-------------|---|-------------|-------------|-------------|
| C  | 2.72818700  | 0.84520000  | -3.04084300 | C | -4.54235100 | -0.35071000 | 0.30207200  |
| C  | 3.40926900  | -0.05323800 | -2.21165900 | C | -3.82160900 | 1.69275600  | -1.02200100 |
| C  | 3.28073700  | 1.41444700  | -4.17865200 | H | -4.47332500 | -0.18404500 | -1.85189600 |
| C  | 4.72354400  | -0.41689000 | -2.51721500 | C | 0.12420500  | 5.22955400  | -0.83445800 |
| C  | 4.59577600  | 1.04155200  | -4.47645500 | H | -0.41008500 | 3.26190800  | -0.08303000 |
| H  | 2.72190700  | 2.10469600  | -4.80272400 | H | -1.17576000 | 3.69120700  | -1.61472800 |
| C  | 5.30237400  | 0.14296200  | -3.65889700 | C | 1.55996600  | 5.19352300  | -2.92013900 |
| H  | 5.27469200  | -1.11000800 | -1.88908600 | H | 2.03890400  | 3.21169200  | -3.65588600 |
| H  | 5.07871600  | 1.45386100  | -5.35809800 | H | 0.33904200  | 3.64512700  | -3.81104300 |
| H  | 6.32253100  | -0.12254700 | -3.92294600 | C | 4.55757800  | 0.24043400  | -2.89818200 |
| H  | 2.68965000  | -1.84922500 | 0.11508700  | H | 3.34095200  | 0.48079300  | -1.12316200 |
| C  | -1.09264200 | -0.86476400 | -1.82770300 | C | 3.46345800  | 1.93397700  | -2.11365400 |
| C  | -1.13842900 | -2.29716900 | -1.79146500 | C | 3.12197800  | -1.67364400 | -3.70587500 |
| C  | -1.64609700 | -0.22056000 | -2.92198300 | H | 1.83504100  | -1.51084500 | -1.97131600 |
| C  | -0.51504000 | -3.05689200 | -0.75982600 | H | 0.98889200  | -1.34629000 | -3.51065000 |
| C  | -1.83017800 | -3.01811700 | -2.82996300 | C | -1.37544700 | -4.74272500 | -1.41211400 |
| C  | -2.30454200 | -0.92970500 | -3.95950000 | H | -0.36205600 | -2.89309700 | -0.87581300 |
| H  | -1.57361400 | 0.86051100  | -3.01016700 | H | -0.81229100 | -3.01346600 | -2.57239600 |
| C  | -0.60587000 | -4.43304800 | -0.72379100 | C | -3.80660700 | -4.45141200 | -2.06337800 |
| H  | 0.07953500  | -2.53668700 | -0.01452900 | H | -4.53447400 | -2.41460400 | -1.96081000 |
| C  | -1.90983300 | -4.43635000 | -2.75803900 | H | -3.34558100 | -2.68743200 | -3.23171500 |
| C  | -2.41191800 | -2.29963400 | -3.90756300 | C | -5.93810900 | 0.27009800  | 0.48428100  |
| H  | -2.72693300 | -0.37913600 | -4.79785600 | H | -3.91338500 | -0.09149800 | 1.16130200  |
| C  | -1.32202800 | -5.13176200 | -1.72612200 | H | -4.62912100 | -1.44344400 | 0.29452900  |
| H  | -0.11235200 | -4.98585200 | 0.07158200  | C | -5.21839900 | 2.30707800  | -0.82688700 |
| H  | -2.44352300 | -4.96571200 | -3.54510100 | H | -3.15412000 | 2.04540400  | -0.22550600 |
| H  | -2.92658900 | -2.85075000 | -4.69176400 | H | -3.39947400 | 2.04643000  | -1.97083900 |
| H  | -1.39067100 | -6.21612400 | -1.68735700 | C | 0.45066800  | 5.93316600  | -2.15938300 |
| Pd | -0.30091800 | 0.29253500  | -0.29079700 | H | 0.99263400  | 5.29350000  | -0.16331400 |
| O  | 2.61617100  | -2.53930500 | 0.81747100  | H | -0.70291700 | 5.73886700  | -0.32381600 |
| C  | 3.52728600  | -3.60868300 | 0.54310500  | H | 2.49746300  | 5.25769800  | -2.34878200 |
| C  | 4.97018900  | -3.14271100 | 0.81337300  | H | 1.75018000  | 5.67648400  | -3.88717200 |
| H  | 5.07731100  | -2.81977700 | 1.85488600  | C | 4.43922400  | -1.28444500 | -3.02088600 |
| H  | 5.69555200  | -3.94374600 | 0.62373500  | H | 5.47799700  | 0.50858600  | -2.36516700 |
| H  | 5.22738600  | -2.29389100 | 0.16882900  | H | 4.63175100  | 0.68920700  | -3.90117700 |
| C  | 3.14794800  | -4.73379000 | 1.51268200  | H | 3.01778300  | -2.76568800 | -3.74559800 |
| H  | 2.12078700  | -5.06575400 | 1.32626900  | C | 3.12821700  | -1.32137200 | -4.74897500 |
| H  | 3.81688800  | -5.59484900 | 1.40135900  | C | -2.51066600 | -5.23311100 | -2.32220300 |
| H  | 3.20784100  | -4.37905800 | 2.54778600  | H | -1.61784500 | -4.97649700 | -0.36546200 |
| C  | 3.37834300  | -4.07914500 | -0.91359800 | H | -0.44261700 | -5.27189500 | -1.64305100 |
| H  | 4.03398400  | -4.93327500 | -1.12365500 | H | -4.17089600 | -4.67838800 | -1.05093600 |
| H  | 2.34392100  | -4.37440900 | -1.11455700 | H | -4.59348100 | -4.77270500 | -2.75778200 |
| H  | 3.63788400  | -3.27522700 | -1.61194300 | C | -5.88251000 | 1.80362800  | 0.46207400  |

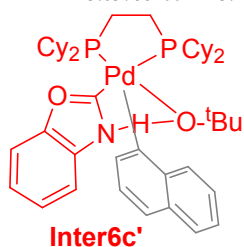

|   |             |             |             |   |             |             |            |
|---|-------------|-------------|-------------|---|-------------|-------------|------------|
| P | 0.52800800  | 1.16862300  | -1.94712900 | H | -6.89156000 | 2.22406000  | 0.55840200 |
| P | -2.16156300 | -0.59561900 | -1.24674200 | C | 1.34946600  | 0.61680300  | 1.17712700 |
| C | -0.86858000 | 1.06470600  | -3.20477400 | O | 1.33311000  | 1.80692600  | 1.90638600 |
| C | 0.88507100  | 3.00570500  | -1.80863600 | N | 2.49051100  | -0.01356900 | 1.28528800 |
| C | 2.02104400  | 0.46107200  | -2.84384400 | C | 2.56712900  | 1.89474400  | 2.50452800 |
| C | -1.75925500 | -0.18197700 | -3.03831900 | C | 3.29860600  | 0.76749000  | 2.11965300 |
| C | -2.45951500 | -2.44814700 | -1.26186700 | C | 3.06930500  | 2.88463500  | 3.33679700 |
| C | -3.86836600 | 0.14955200  | -0.99469700 | C | 4.61250100  | 0.59440600  | 2.56037800 |
| H | -1.47132300 | 1.96814400  | -3.06469100 | C | 4.38336100  | 2.70180000  | 3.78210800 |
| H | -0.46801800 | 1.10873000  | -4.22500800 | H | 2.47716200  | 3.74677100  | 3.62708800 |
| C | -0.23456000 | 3.74885100  | -1.04824000 | C | 5.13971500  | 1.57981200  | 3.39804400 |
| C | 1.20919400  | 3.71101900  | -3.14207300 | H | 5.18539000  | -0.27242100 | 2.24583400 |
| H | 1.77831000  | 3.04062600  | -1.16923800 | H | 4.82826300  | 3.44483700  | 4.43844300 |
| C | 3.35156600  | 0.84407800  | -2.15726900 | H | 6.15858900  | 1.48014200  | 3.76287700 |
| C | 1.90774500  | -1.07376700 | -2.97567000 | H | 3.45419900  | -1.56837800 | 0.70662900 |
| H | 2.01220800  | 0.89519500  | -3.85594800 | C | -1.00131200 | -0.73466100 | 1.83389000 |
| H | -2.68592200 | -0.06381400 | -3.61368200 | C | -1.73015600 | 0.03070000  | 2.80339800 |
| H | -1.24685300 | -1.05813800 | -3.44850400 | C | -0.77941600 | -2.07598200 | 2.09659300 |
| C | -1.15739200 | -3.22671100 | -1.55065000 | C | -1.98033600 | 1.42388900  | 2.64326000 |
| C | -3.59511100 | -2.93122400 | -2.18853000 | C | -2.24385600 | -0.60699000 | 3.98779400 |
| H | -2.73646300 | -2.66579000 | -0.22060100 | C | -1.27382800 | -2.70564900 | 3.26862000 |



|    |             |             |             |
|----|-------------|-------------|-------------|
| H  | -0.20138600 | -2.67965700 | 1.40109900  |
| C  | -2.70166800 | 2.14419500  | 3.57096800  |
| H  | -1.56699200 | 1.91481500  | 1.76685600  |
| C  | -2.98511400 | 0.16300500  | 4.92627700  |
| C  | -1.99784400 | -1.99028500 | 4.19316000  |
| H  | -1.07198600 | -3.76240500 | 3.43160500  |
| C  | -3.21461500 | 1.50530000  | 4.72621700  |
| H  | -2.86862100 | 3.20865500  | 3.42462600  |
| H  | -3.36832400 | -0.33341100 | 5.81566500  |
| H  | -2.38264100 | -2.46692800 | 5.09211000  |
| H  | -3.78154100 | 2.07842800  | 5.45556200  |
| Pd | -0.28843200 | 0.11446000  | 0.07553600  |
| O  | 4.18765100  | -2.18536000 | 0.47361400  |
| C  | 3.90817500  | -3.48509200 | 1.00095100  |
| C  | 3.59483100  | -3.39323500 | 2.50421000  |
| H  | 2.70342100  | -2.77981400 | 2.67878900  |
| H  | 3.41461100  | -4.38595100 | 2.93489700  |
| H  | 4.43293800  | -2.93361700 | 3.03940000  |
| C  | 2.72102800  | -4.10861500 | 0.24438000  |
| H  | 2.94071100  | -4.15903800 | -0.82821500 |
| H  | 2.49942200  | -5.12253300 | 0.60066200  |
| H  | 1.82137900  | -3.49666500 | 0.38188900  |
| C  | 5.18093600  | -4.30539100 | 0.76454000  |
| H  | 6.02799700  | -3.84594800 | 1.28523100  |
| H  | 5.06356600  | -5.33294800 | 1.12744100  |
| H  | 5.41824600  | -4.33882600 | -0.30467000 |

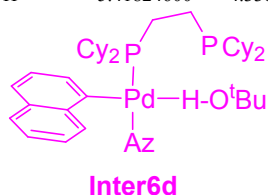

|   |             |             |             |
|---|-------------|-------------|-------------|
| P | -0.22846800 | -1.75620500 | -0.69045400 |
| P | 4.21570700  | -0.67703800 | -0.12099500 |
| C | 1.56231000  | -1.28808300 | -0.99741700 |
| C | -0.17901100 | -3.06708300 | 0.66366400  |
| C | -0.50759800 | -2.76217200 | -2.27449000 |
| C | 2.34260200  | -0.62497900 | 0.15108000  |
| C | 4.83105700  | -0.41201200 | 1.65314100  |
| C | 4.57174100  | 0.99942100  | -0.92605100 |
| H | 2.07731100  | -2.20169700 | -1.31721100 |
| H | 1.54324200  | -0.62086500 | -1.86387400 |
| C | -0.26266400 | -2.46342200 | 2.08526800  |
| C | 0.97902000  | -4.08100300 | 0.54931500  |
| H | -1.11791700 | -3.61646200 | 0.51456100  |
| C | -1.68100300 | -3.76026900 | -2.21275500 |
| C | -0.68063100 | -1.83852200 | -3.50009000 |
| H | 0.41636100  | -3.34306400 | -2.41645200 |
| H | 1.98686600  | 0.39420200  | 0.32482700  |
| H | 2.18190300  | -1.17855200 | 1.08101500  |
| C | 4.68686600  | -1.71122300 | 2.47652800  |
| C | 4.25189200  | 0.78895800  | 2.42663900  |
| H | 5.91172200  | -0.24399900 | 1.52914200  |
| C | 6.08773200  | 1.29488900  | -0.90722800 |
| C | 4.04612600  | 1.01953800  | -2.37887000 |
| H | 4.05037100  | 1.78943900  | -0.36631500 |
| C | -0.35787800 | -3.57223700 | 3.14858000  |
| H | -1.13583300 | -1.80686800 | 2.15219000  |
| H | 0.62258400  | -1.84735500 | 2.28984300  |
| C | 0.86691700  | -5.17973900 | 1.62162600  |
| H | 0.99785900  | -4.54050400 | -0.44721100 |
| H | 1.94009400  | -3.56436500 | 0.67199100  |
| C | -1.80084000 | -4.56877300 | -3.51783500 |
| H | -2.61705900 | -3.21073100 | -2.04261000 |
| H | -1.56242500 | -4.45459000 | -1.37368200 |
| C | -0.79103600 | -2.64200100 | -4.80676300 |
| H | -1.59424400 | -1.24452900 | -3.36295600 |
| H | 0.14556400  | -1.12364300 | -3.57544600 |
| C | 5.31917700  | -1.57271200 | 3.87247600  |
| H | 5.14235200  | -2.55045000 | 1.93601800  |
| H | 3.62157200  | -1.95926000 | 2.59775000  |

|   |             |             |             |
|---|-------------|-------------|-------------|
| C | 4.88528800  | 0.92325900  | 3.82335700  |
| H | 4.40030400  | 1.71828500  | 1.86476600  |
| H | 3.16536700  | 0.66883500  | 2.53699400  |
| C | 6.43853600  | 2.60048200  | -1.64118400 |
| H | 6.62329700  | 0.45930900  | -1.38291100 |
| H | 6.45511100  | 1.35343300  | 0.12401700  |
| C | 4.40410100  | 2.32467500  | -3.10971900 |
| H | 4.47134200  | 0.16664400  | -2.92879200 |
| H | 2.95786400  | 0.89601000  | -2.39065100 |
| C | 0.79239300  | -4.58244400 | 3.03402500  |
| H | -1.31586800 | -4.10014700 | 3.02963400  |
| H | -0.37399900 | -3.12215800 | 4.14935100  |
| H | -0.03582400 | -5.77958500 | 1.43283400  |
| H | 1.72031800  | -5.86492600 | 1.53898800  |
| C | -1.93882200 | -3.65882600 | -4.74555300 |
| H | -2.65716800 | -5.25171300 | -3.44873600 |
| H | -0.90690100 | -5.19967800 | -3.63149700 |
| H | -0.93278100 | -1.95457800 | -5.65031200 |
| H | 0.15644700  | -3.17005200 | -4.98976100 |
| C | 4.74545300  | -0.37111000 | 4.63785900  |
| H | 6.40659300  | -1.44689400 | 3.76300600  |
| H | 5.16846100  | -2.49772900 | 4.44439100  |
| H | 5.95261700  | 1.16735100  | 3.71393700  |
| H | 4.42745100  | 1.76366900  | 4.36143600  |
| C | 5.91302700  | 2.59872500  | -3.08278700 |
| H | 7.52605900  | 2.75102100  | -1.62837600 |
| H | 5.99858700  | 3.44934600  | -1.09722800 |
| H | 4.04002900  | 2.27904300  | -4.14439700 |
| H | 3.87352300  | 3.15830900  | -2.62902700 |
| H | 0.67475600  | -5.38076200 | 3.77790600  |
| H | 1.74337400  | -4.07891900 | 3.26406400  |
| H | -2.89636300 | -3.12013600 | -4.69156600 |
| H | -1.96895500 | -4.25975000 | -5.66318400 |
| H | 5.24290500  | -0.26635300 | 5.61070300  |
| H | 3.68073400  | -0.55193300 | 4.84915400  |
| H | 6.43575700  | 1.82036500  | -3.65876100 |
| H | 6.13786900  | 3.55501800  | -3.57281800 |
| N | -3.94235700 | 1.42884700  | 1.30200200  |
| C | -4.62513900 | 2.63941300  | 1.42480600  |
| C | -3.09244900 | 1.57274000  | 0.30891400  |
| C | -4.12845500 | 3.50603600  | 0.44347900  |
| C | -5.63098400 | 3.07122900  | 2.29337700  |
| O | -3.16314600 | 2.83009800  | -0.25831200 |
| C | -4.58081800 | 4.80562700  | 0.26642200  |
| C | -6.10144200 | 4.37597400  | 2.13435300  |
| H | -6.02597300 | 2.41517800  | 3.06339100  |
| C | -5.58717800 | 5.22819200  | 1.14027700  |
| H | -4.17376500 | 5.45304700  | -0.50336400 |
| H | -6.88246000 | 4.74477400  | 2.79375800  |
| H | -5.97893200 | 6.23751600  | 1.05008800  |
| O | -3.36867000 | -1.19005600 | 1.16889000  |
| C | -0.70582000 | 1.45402000  | -1.11038700 |
| C | 0.12530000  | 2.33778900  | -0.34728300 |
| C | -0.78814900 | 1.62312600  | -2.47964800 |
| C | 0.22870400  | 2.27331500  | 1.07186000  |
| C | 0.88398500  | 3.35375100  | -1.02915000 |
| C | -0.04379100 | 2.62959100  | -3.14695400 |
| H | -1.44376500 | 0.99178700  | -3.07058700 |
| C | 1.03294400  | 3.14095300  | 1.77914300  |
| H | -0.35597500 | 1.51999100  | 1.59235900  |
| C | 1.71256900  | 4.22666700  | -0.27027600 |
| C | 0.77844600  | 3.47522000  | -2.44028600 |
| H | -0.13678800 | 2.73102700  | -4.22592800 |
| C | 1.78982100  | 4.12681600  | 1.10066000  |
| H | 1.08353000  | 3.07296500  | 2.86270300  |
| H | 2.27940700  | 4.99076300  | -0.79846000 |
| H | 1.34686300  | 4.25206000  | -2.94621400 |
| H | 2.42138000  | 4.80848200  | 1.66453700  |
| C | -4.55294700 | -1.98190400 | 0.86115300  |
| C | -4.12065600 | -3.44846100 | 0.86459300  |
| H | -3.70508900 | -3.72249000 | 1.84014300  |
| H | -4.97707000 | -4.10028300 | 0.65802800  |
| H | -3.36251400 | -3.63582400 | 0.09999700  |
| C | -5.58967000 | -1.73828500 | 1.96911000  |
| H | -5.89686000 | -0.68755600 | 1.99175300  |

|    |             |             |             |
|----|-------------|-------------|-------------|
| H  | -6.48262300 | -2.35122200 | 1.80225700  |
| H  | -5.17133900 | -1.99775100 | 2.94782600  |
| C  | -5.11112200 | -1.56677500 | -0.50670500 |
| H  | -5.99378600 | -2.16292500 | -0.76764100 |
| H  | -5.39633200 | -0.51023600 | -0.50119100 |
| H  | -4.35531300 | -1.70816600 | -1.28726900 |
| Pd | -1.83350200 | 0.05467000  | -0.20655000 |
| H  | -3.69756900 | -0.30783200 | 1.50186700  |

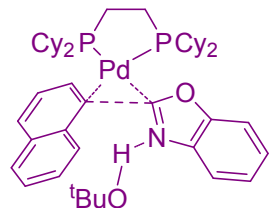

**TS6-7**

|   |             |             |             |
|---|-------------|-------------|-------------|
| P | -1.97377500 | -0.00894100 | 0.49494800  |
| P | 1.07410300  | 0.50489300  | 1.73673800  |
| C | -1.76116900 | 0.97521800  | 2.08534300  |
| C | -3.24994200 | 1.00155900  | -0.45135400 |
| C | -2.92816800 | -1.54210700 | 1.03560300  |
| C | -0.43819300 | 0.71927200  | 2.84022700  |
| C | 2.25923900  | -0.46995100 | 2.83100900  |
| C | 1.83909700  | 2.22629300  | 1.69362900  |
| H | -1.80865100 | 2.02720700  | 1.78414100  |
| H | -2.60931100 | 0.80649300  | 2.76084700  |
| C | -2.62202900 | 2.28830200  | -1.02937100 |
| C | -4.55497900 | 1.31921800  | 0.30746100  |
| H | -3.49546700 | 0.35678100  | -1.30756000 |
| C | -3.55254700 | -2.28015600 | -0.16886800 |
| C | -2.02609300 | -2.50010300 | 1.84581600  |
| H | -3.74297300 | -1.20156700 | 1.69318100  |
| H | -0.26734700 | 1.52326300  | 3.56713400  |
| H | -0.52023800 | -0.20735400 | 3.41735600  |
| C | 1.78391200  | -1.92713100 | 3.01892400  |
| C | 2.58872100  | 0.18009900  | 4.19214600  |
| H | 3.18356900  | -0.50901600 | 2.23600800  |
| C | 3.24109400  | 2.18872900  | 1.04727500  |
| C | 0.93057200  | 3.23336400  | 0.95654300  |
| H | 1.94123200  | 2.56578700  | 2.73520700  |
| C | -3.62283300 | 3.05584800  | -1.90988700 |
| H | -1.72789600 | 2.03363200  | -1.60819800 |
| H | -2.29566900 | 2.94553100  | -0.20965700 |
| C | -5.54937000 | 2.09225100  | -0.57798200 |
| H | -5.02735500 | 0.39903300  | 0.67140900  |
| H | -4.32349300 | 1.92510400  | 1.19537200  |
| C | -4.29782000 | -3.55455500 | 0.26540400  |
| H | -2.76148800 | -2.55056300 | -0.88008800 |
| H | -4.24781800 | -1.62438100 | -0.70598500 |
| C | -2.78095300 | -3.77057800 | 2.27398200  |
| H | -1.15260200 | -2.78276800 | 1.24305300  |
| H | -1.64113000 | -1.99473200 | 2.73963900  |
| C | 2.80928000  | -2.74973900 | 3.81822200  |
| H | 1.60093300  | -2.40549700 | 2.05088000  |
| H | 0.82929600  | -1.93690200 | 3.56585300  |
| C | 3.61167200  | -0.65421600 | 4.98426500  |
| H | 2.97705100  | 1.19636600  | 4.05774600  |
| H | 1.66774800  | 0.27104400  | 4.78634100  |
| C | 3.87156200  | 3.58956100  | 0.96522900  |
| H | 3.15727700  | 1.76355000  | 0.03901300  |
| H | 3.90655900  | 1.52549000  | 1.61269100  |
| C | 1.57021600  | 4.63036700  | 0.87376300  |
| H | 0.73095200  | 2.86087700  | -0.05776100 |
| H | -0.04075500 | 3.31082300  | 1.46050700  |
| C | -4.92203800 | 3.36933700  | -1.15447800 |
| H | -3.85461900 | 2.45101900  | -2.79866000 |
| H | -3.16031100 | 3.98187200  | -2.27507400 |
| H | -5.87485100 | 1.44319200  | -1.40431500 |
| H | -6.44996700 | 2.33512000  | 0.00089200  |
| C | -3.39141400 | -4.49654200 | 1.06825600  |

|    |             |             |             |
|----|-------------|-------------|-------------|
| H  | -4.69231200 | -4.06530100 | -0.62223700 |
| H  | -5.16806000 | -3.27740700 | 0.87972500  |
| H  | -2.09607000 | -4.43625200 | 2.81419600  |
| H  | -3.58150800 | -3.50161000 | 2.98007600  |
| C  | 3.14029900  | -2.10270700 | 5.16996000  |
| H  | 3.73127700  | -2.84638100 | 3.22641800  |
| H  | 2.42632500  | -3.76766300 | 3.96512400  |
| H  | 4.57113200  | -0.65104800 | 4.44614300  |
| H  | 3.79866200  | -0.18207000 | 5.95763500  |
| C  | 2.96032900  | 4.57875300  | 0.22631100  |
| H  | 4.84756900  | 3.52344900  | 0.46790100  |
| H  | 4.06379200  | 3.96431600  | 1.98190600  |
| H  | 0.90988000  | 5.30415300  | 0.31256500  |
| H  | 1.65697900  | 5.05046900  | 1.88706100  |
| H  | -5.63540000 | 3.87752000  | -1.81575500 |
| H  | -4.70463500 | 4.06874100  | -0.33294900 |
| H  | -2.58149800 | -4.86051100 | 0.41989100  |
| H  | -3.95433400 | -5.37927600 | 1.39793000  |
| H  | 3.90539000  | -2.68622300 | 5.69798900  |
| H  | 2.24339500  | -2.11274100 | 5.80764900  |
| H  | 2.85987800  | 4.26471600  | -0.82294800 |
| H  | 3.41207500  | 5.57890300  | 0.21336300  |
| C  | 1.87258600  | -0.78315900 | -1.59089800 |
| O  | 2.77554900  | 0.22819000  | -1.96892100 |
| N  | 2.44573500  | -1.97830600 | -1.58965100 |
| C  | 3.96138600  | -0.41008700 | -2.21686500 |
| C  | 3.76594900  | -1.77894000 | -1.97540900 |
| C  | 5.16672000  | 0.13683100  | -2.62468100 |
| C  | 4.83178800  | -2.66686300 | -2.15583900 |
| C  | 6.22761200  | -0.76274800 | -2.79545900 |
| H  | 5.27985000  | 1.20110900  | -2.80547300 |
| C  | 6.05908900  | -2.13733500 | -2.56537800 |
| H  | 4.70639800  | -3.73238900 | -1.99054300 |
| H  | 7.19573300  | -0.38824200 | -3.11595200 |
| H  | 6.90285600  | -2.80605600 | -2.71316400 |
| C  | 0.23728800  | -0.54025900 | -2.54664200 |
| C  | -0.44186900 | -1.65887300 | -3.14917100 |
| C  | 0.26679500  | 0.67025400  | -3.23533600 |
| C  | -0.53248800 | -2.93272000 | -2.52802400 |
| C  | -1.07786500 | -1.48447200 | -4.42748400 |
| C  | -0.37291700 | 0.83667400  | -4.48342000 |
| H  | 0.82427600  | 1.50376000  | -2.82037700 |
| C  | -1.20850200 | -3.97437700 | -3.13106900 |
| H  | -0.05307300 | -3.09074700 | -1.56898200 |
| C  | -1.76286600 | -2.58003400 | -5.02025100 |
| C  | -1.03032000 | -0.21927300 | -5.07216200 |
| H  | -0.32899100 | 1.80280600  | -4.98054400 |
| C  | -1.83035700 | -3.80106500 | -4.38928200 |
| H  | -1.26201300 | -4.93924300 | -2.63323000 |
| H  | -2.23804000 | -2.43144600 | -5.98767500 |
| H  | -1.51417000 | -0.10481100 | -6.03946900 |
| H  | -2.35773200 | -4.63026600 | -4.85394400 |
| Pd | 0.28818600  | -0.28164300 | -0.41957500 |
| H  | 1.77840600  | -3.38956300 | -0.44628100 |
| O  | 1.31010200  | -3.99209500 | 0.18111700  |
| C  | 1.88046600  | -5.30590300 | 0.11541600  |
| C  | 0.97352700  | -6.18888500 | 0.97938600  |
| H  | -0.05007100 | -6.17635200 | 0.58876400  |
| H  | 1.32830000  | -7.22570500 | 0.99362800  |
| H  | 0.94894600  | -5.81688800 | 2.00976100  |
| C  | 1.89276600  | -5.80868000 | -1.33792500 |
| H  | 2.31265600  | -6.81969500 | -1.40424800 |
| H  | 0.87683700  | -5.83002400 | -1.74540000 |
| H  | 2.49198800  | -5.14812600 | -1.97474400 |
| C  | 3.30849900  | -5.28352500 | 0.68822500  |
| H  | 3.29606100  | -4.93201100 | 1.72519000  |
| H  | 3.76514200  | -6.28082800 | 0.66661000  |
| H  | 3.94751000  | -4.60599700 | 0.11027400  |

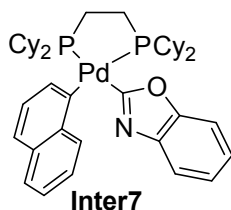

|   |             |             |             |
|---|-------------|-------------|-------------|
| P | -1.31040300 | -1.43799400 | 1.07184600  |
| P | 1.90381200  | -1.20778700 | 0.45512300  |
| C | -0.10946600 | -2.46707500 | 2.08847300  |
| C | -2.40855600 | -0.59778600 | 2.33548800  |
| C | -2.42418000 | -2.68637600 | 0.21761100  |
| C | 1.24178300  | -2.70780700 | 1.38471000  |
| C | 2.93221300  | -1.95052100 | -0.92606500 |
| C | 3.16097400  | -0.47524100 | 1.64550800  |
| H | 0.05400300  | -1.90864900 | 3.01644900  |
| H | -0.56142900 | -3.42517700 | 2.37383400  |
| C | -1.62922300 | 0.49317600  | 3.10107900  |
| C | -3.15050200 | -1.53825100 | 3.30751400  |
| H | -3.14177700 | -0.06705600 | 1.71419500  |
| C | -3.53849500 | -1.97684200 | -0.58389900 |
| C | -1.62609700 | -3.63767100 | -0.69910900 |
| H | -2.89078000 | -3.29543200 | 1.00634500  |
| H | 1.98678900  | -3.05850800 | 2.10919500  |
| H | 1.13022900  | -3.50221700 | 0.64030500  |
| C | 2.03620100  | -2.63299700 | -1.98245300 |
| C | 4.06647400  | -2.89925000 | -0.48552900 |
| H | 3.38096100  | -1.07087900 | -1.40827200 |
| C | 4.09697800  | 0.54536600  | 0.96123200  |
| C | 2.45998400  | 0.16139300  | 2.86539000  |
| H | 3.77103300  | -1.31720400 | 2.00859500  |
| C | -2.55270400 | 1.27308200  | 4.05128600  |
| H | -1.17250000 | 1.18083000  | 2.38285500  |
| H | -0.81732200 | 0.03885000  | 3.68849500  |
| C | -4.06585300 | -0.74585700 | 4.25947800  |
| H | -3.74893700 | -2.27445800 | 2.75790200  |
| H | -2.42095500 | -2.10652800 | 3.90366600  |
| C | -4.45477500 | -2.98613900 | -1.29618100 |
| H | -3.07577000 | -1.31565000 | -1.32755500 |
| H | -4.13786000 | -1.33490900 | 0.07125000  |
| C | -2.54713800 | -4.64285400 | -1.41259100 |
| H | -1.08491600 | -3.04589200 | -1.45010400 |
| H | -0.87243000 | -4.18560100 | -0.12004400 |
| C | 2.86210300  | -3.10004500 | -3.19232000 |
| H | 1.24402800  | -1.94624300 | -2.30059600 |
| H | 1.53744400  | -3.50719800 | -1.53950500 |
| C | 4.88859700  | -3.38120500 | -1.69555900 |
| H | 4.73062000  | -2.40573500 | 0.23319800  |
| H | 3.63821700  | -3.77215300 | 0.02879200  |
| C | 5.10350300  | 1.14231500  | 1.96056900  |
| H | 3.49780200  | 1.35184700  | 0.52358500  |
| H | 4.64300800  | 0.07445900  | 0.13510300  |
| C | 3.47308600  | 0.76467300  | 3.85344100  |
| H | 1.77972200  | 0.94844600  | 2.51604100  |
| H | 1.84411800  | -0.58347800 | 3.38492800  |
| C | -3.29262600 | 0.34025600  | 5.02024800  |
| H | -3.28155600 | 1.83495400  | 3.45117600  |
| H | -1.96632500 | 2.01531300  | 4.60784800  |
| H | -4.86910100 | -0.27613300 | 3.67372300  |
| H | -4.55246700 | -1.43508400 | 4.96183300  |
| C | -3.65600900 | -3.93350100 | -2.20171300 |
| H | -5.20890200 | -2.44426300 | -1.87998300 |
| H | -5.00271000 | -3.57581600 | -0.54584600 |
| H | -1.94995500 | -5.28043800 | -2.07715000 |
| H | -3.00285800 | -5.30974100 | -0.66565400 |
| C | 4.00317700  | -4.03522000 | -2.76645200 |
| H | 3.27967700  | -2.22068000 | -3.70346600 |
| H | 2.20765700  | -3.60157400 | -3.91644000 |
| H | 5.41312000  | -2.52056600 | -2.13539600 |
| H | 5.66419300  | -4.08142900 | -1.35977400 |
| C | 4.39585300  | 1.77908200  | 3.16405500  |

|    |             |             |             |
|----|-------------|-------------|-------------|
| H  | 5.72674500  | 1.88478800  | 1.44715000  |
| H  | 5.78287100  | 0.35100100  | 2.31276700  |
| H  | 2.93514700  | 1.23695900  | 4.68536900  |
| H  | 4.08015400  | -0.04234000 | 4.29079100  |
| H  | -3.97657500 | 0.91484800  | 5.65774700  |
| H  | -2.56535200 | -0.13847000 | 5.69345100  |
| H  | -3.20542100 | -3.35564000 | -3.02176900 |
| H  | -4.32229400 | -4.67118500 | -2.66653000 |
| H  | 4.60886200  | -4.31935000 | -3.63614500 |
| H  | 3.57685200  | -4.96681900 | -2.36480600 |
| H  | 3.80062700  | 2.63611300  | 2.81899800  |
| H  | 5.13233800  | 2.16941900  | 3.87789700  |
| C  | -1.63097500 | 1.12690900  | -0.86606300 |
| O  | -1.92883900 | 1.18199100  | -2.23343900 |
| N  | -2.50774300 | 1.76080600  | -0.13267500 |
| C  | -3.07775300 | 1.92272300  | -2.32497500 |
| C  | -3.44483300 | 2.29075700  | -1.02369600 |
| C  | -3.79828800 | 2.27832200  | -3.45617200 |
| C  | -4.59388700 | 3.05869700  | -0.81820700 |
| C  | -4.94651700 | 3.04742500  | -3.23803900 |
| H  | -3.48482100 | 1.98106000  | -4.45208000 |
| C  | -5.33608900 | 3.42935500  | -1.94207400 |
| H  | -4.89147200 | 3.35686700  | 0.18302600  |
| H  | -5.54720900 | 3.35816100  | -4.08868200 |
| H  | -6.23372300 | 4.02902900  | -1.81523500 |
| C  | 1.13631000  | 1.42989500  | -1.35838000 |
| C  | 1.52398600  | 2.70480100  | -0.82720100 |
| C  | 1.55353200  | 1.10615400  | -2.63889800 |
| C  | 1.10289400  | 3.15354100  | 0.45757900  |
| C  | 2.36873400  | 3.58145500  | -1.59647200 |
| C  | 2.37105000  | 1.97485100  | -3.40753900 |
| H  | 1.24599100  | 0.16643400  | -3.09160400 |
| C  | 1.50074300  | 4.37050700  | 0.96850800  |
| H  | 0.43082900  | 2.51301700  | 1.02132600  |
| C  | 2.76542400  | 4.82887500  | -1.04017500 |
| C  | 2.78199900  | 3.18304300  | -2.89521600 |
| H  | 2.67224700  | 1.67605400  | -4.40981300 |
| C  | 2.34838700  | 5.21704900  | 0.21289900  |
| H  | 1.15263100  | 4.69022100  | 1.94766600  |
| H  | 3.40639400  | 5.47965200  | -1.63191300 |
| H  | 3.41542300  | 3.85065100  | -3.47547500 |
| H  | 2.65834000  | 6.17624200  | 0.62018000  |
| Pd | 0.00654300  | 0.07604500  | -0.25762300 |

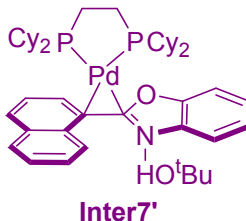

|   |             |             |             |
|---|-------------|-------------|-------------|
| P | -3.07848100 | 0.22600000  | 0.42998300  |
| P | -0.00696200 | -0.00191200 | 1.74537200  |
| C | -2.81540300 | 0.46078600  | 2.28385200  |
| C | -4.15393500 | 1.70780900  | -0.02857500 |
| C | -4.28597300 | -1.22083500 | 0.35642900  |
| C | -1.53241100 | -0.19573600 | 2.83933800  |
| C | 1.07799400  | -1.44854100 | 2.27126900  |
| C | 0.86673400  | 1.49581300  | 2.48678800  |
| H | -2.77065800 | 1.54299500  | 2.44638900  |
| H | -3.68928600 | 0.09904600  | 2.84107100  |
| C | -3.30906600 | 2.99817700  | -0.09238100 |
| C | -5.41962700 | 1.92754400  | 0.82596800  |
| H | -4.47353200 | 1.48467400  | -1.05766900 |
| C | -4.78425400 | -1.46110500 | -1.08466600 |
| C | -3.65564700 | -2.50968400 | 0.92605800  |
| H | -5.15131200 | -0.96380500 | 0.98682900  |
| H | -1.33381800 | 0.18313200  | 3.85013300  |
| H | -1.68941800 | -1.27523000 | 2.93757800  |
| C | 0.52900400  | -2.77347500 | 1.69701000  |
| C | 1.34570600  | -1.58117000 | 3.78512300  |
| H | 2.03558100  | -1.25504400 | 1.76761800  |

|   |             |             |             |
|---|-------------|-------------|-------------|
| C | 2.22282700  | 1.73807800  | 1.79216700  |
| C | -0.00326700 | 2.76825000  | 2.41783900  |
| H | 1.05070800  | 1.27368000  | 3.54878600  |
| C | -4.13581900 | 4.18994800  | -0.60341700 |
| H | -2.43209500 | 2.83688400  | -0.73081600 |
| H | -2.92451700 | 3.23849900  | 0.90936000  |
| C | -6.24288900 | 3.12477800  | 0.31572300  |
| H | -6.04729000 | 1.02858000  | 0.82982600  |
| H | -5.12947100 | 2.11226600  | 1.87009800  |
| C | -5.74940700 | -2.65671500 | -1.16448800 |
| H | -3.91751700 | -1.64720300 | -1.73249600 |
| H | -5.28346100 | -0.56534800 | -1.47474800 |
| C | -4.62097900 | -3.70487200 | 0.84005200  |
| H | -2.73775600 | -2.73983100 | 0.36810000  |
| H | -3.36056600 | -2.35956100 | 1.97140400  |
| C | 1.47437600  | -3.94770000 | 2.00013900  |
| H | 0.38430200  | -2.67809600 | 0.61524800  |
| H | -0.45764500 | -2.99119600 | 2.13378800  |
| C | 2.28522600  | -2.76348300 | 4.08664400  |
| H | 1.78576100  | -0.65992100 | 4.18556700  |
| H | 0.39520000  | -1.73327400 | 4.31720000  |
| C | 2.95323800  | 2.96051100  | 2.37257800  |
| H | 2.04509300  | 1.90658400  | 0.72176800  |
| H | 2.86645500  | 0.85498500  | 1.85697000  |
| C | 0.73034300  | 3.99535900  | 2.98914400  |
| H | -0.27586100 | 2.96129200  | 1.37074000  |
| H | -0.94084200 | 2.62222100  | 2.96811200  |
| C | -5.39988200 | 4.40555200  | 0.24223400  |
| H | -4.42486900 | 4.00635400  | -1.64893100 |
| H | -3.51811800 | 5.09720500  | -0.60541800 |
| H | -6.63448600 | 2.89083100  | -0.68531100 |
| H | -7.11572600 | 3.27764200  | 0.96365600  |
| C | -5.11478700 | -3.93263600 | -0.59495400 |
| H | -6.05623000 | -2.81392700 | -2.20656000 |
| H | -6.66535700 | -2.42370400 | -0.60087400 |
| H | -4.12482800 | -4.60621200 | 1.22217200  |
| H | -5.48510800 | -3.52118300 | 1.49616400  |
| C | 1.75030800  | -4.07974100 | 3.50468000  |
| H | 2.42029400  | -3.78595000 | 1.46502600  |
| H | 1.04631300  | -4.87854400 | 1.60632300  |
| H | 3.27282400  | -2.55251700 | 3.65220500  |
| H | 2.43117800  | -2.85457200 | 5.17126900  |
| C | 2.08324900  | 4.22251600  | 2.30098900  |
| H | 3.89383000  | 3.11543500  | 1.82948800  |
| H | 3.22359700  | 2.76273300  | 3.42103000  |
| H | 0.09379200  | 4.88442800  | 2.88910100  |
| H | 0.89293300  | 3.84772300  | 4.06741500  |
| H | -5.99701100 | 5.23067000  | -0.16635100 |
| H | -5.10727000 | 4.70491900  | 1.25981600  |
| H | -4.26480500 | -4.22771800 | -1.22734200 |
| H | -5.83234500 | -4.76256600 | -0.62425000 |
| H | 2.46172500  | -4.89420400 | 3.69369000  |
| H | 0.81834700  | -4.35255600 | 4.02307500  |
| H | 1.91633500  | 4.48484900  | 1.24609900  |
| H | 2.60279100  | 5.07474900  | 2.75803800  |
| C | 1.48955900  | 0.71749000  | -2.15795100 |
| O | 1.03560400  | 1.98891200  | -2.49147900 |
| N | 2.76797200  | 0.68968600  | -1.85135200 |
| C | 2.12638100  | 2.80497700  | -2.37628200 |
| C | 3.20980200  | 2.00475300  | -1.99192400 |
| C | 2.20735000  | 4.16971000  | -2.59917900 |
| C | 4.46978400  | 2.58976200  | -1.83166500 |
| C | 3.47218300  | 4.74396100  | -2.42464600 |
| H | 1.34366800  | 4.75372500  | -2.89990100 |
| C | 4.58022100  | 3.96538200  | -2.05176800 |
| H | 5.33500900  | 1.99431200  | -1.56002100 |
| H | 3.59848400  | 5.81027800  | -2.58809300 |
| H | 5.54824400  | 4.44472100  | -1.93546100 |
| C | 0.48804500  | -0.34452600 | -2.26775300 |
| C | 0.86292700  | -1.76911000 | -2.37587300 |
| C | -0.83333000 | 0.03924500  | -2.70226100 |
| C | 2.08215900  | -2.29234300 | -1.89591700 |
| C | -0.05006400 | -2.67641600 | -3.00301700 |
| C | -1.68521100 | -0.91228900 | -3.36401700 |
| H | -1.02319200 | 1.08854600  | -2.90195600 |

|    |             |             |             |
|----|-------------|-------------|-------------|
| C  | 2.39595900  | -3.63829600 | -2.02730500 |
| H  | 2.77663100  | -1.64335400 | -1.38675300 |
| C  | 0.29887600  | -4.03936000 | -3.12797200 |
| C  | -1.31151400 | -2.20989800 | -3.51579800 |
| H  | -2.63596100 | -0.55979900 | -3.75709400 |
| C  | 1.50445100  | -4.52372800 | -2.65165200 |
| H  | 3.34108200  | -4.00411800 | -1.63375200 |
| H  | -0.40788400 | -4.70975200 | -3.61275800 |
| H  | -1.95656400 | -2.92193400 | -4.02531500 |
| H  | 1.75375800  | -5.57658400 | -2.75516600 |
| Pd | -0.89171500 | 0.02318200  | -0.50088100 |
| H  | 3.88707900  | -0.29438700 | -0.33671700 |
| O  | 4.17224600  | -0.85852000 | 0.41175400  |
| C  | 5.59390600  | -1.06638800 | 0.37167800  |
| C  | 5.85037500  | -2.28394200 | 1.26608700  |
| H  | 5.33476300  | -3.16434600 | 0.86791600  |
| H  | 6.92143600  | -2.50575100 | 1.33170200  |
| H  | 5.47391000  | -2.09636200 | 2.27780000  |
| C  | 6.04884800  | -1.35018700 | -1.06794500 |
| H  | 7.12857400  | -1.53478000 | -1.11176900 |
| H  | 5.53210700  | -2.22924100 | -1.46787900 |
| H  | 5.82529900  | -0.50267600 | -1.72680100 |
| C  | 6.30926200  | 0.17073600  | 0.94089300  |
| H  | 5.96990500  | 0.36484900  | 1.96408900  |
| H  | 7.39737200  | 0.03378800  | 0.95712000  |
| H  | 6.08857300  | 1.06022400  | 0.34025500  |

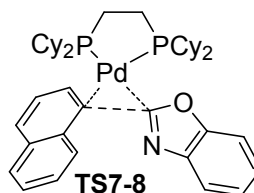

|   |             |             |             |
|---|-------------|-------------|-------------|
| P | -2.12351000 | 0.23433800  | 0.45775800  |
| P | 0.96495300  | 0.50472800  | 1.67150800  |
| C | -1.82496400 | 1.09263200  | 2.11143500  |
| C | -3.19278600 | 1.46350300  | -0.48421700 |
| C | -3.32057400 | -1.15201000 | 0.89340800  |
| C | -0.51732200 | 0.67492200  | 2.82040000  |
| C | 2.08103700  | -0.71535600 | 2.56715600  |
| C | 1.87967000  | 2.14087600  | 1.83127400  |
| H | -1.79386400 | 2.16585600  | 1.89502900  |
| H | -2.67741600 | 0.93501800  | 2.78412000  |
| C | -2.36309800 | 2.68010200  | -0.94843400 |
| C | -4.48675200 | 1.92271800  | 0.21844800  |
| H | -3.47244600 | 0.90879000  | -1.39210000 |
| C | -3.90989800 | -1.80772000 | -0.37448500 |
| C | -2.63470600 | -2.21528100 | 1.77833800  |
| H | -4.14450100 | -0.70813000 | 1.47301100  |
| H | -0.29747200 | 1.37463600  | 3.63660300  |
| H | -0.65073100 | -0.30906200 | 3.28345800  |
| C | 1.56343400  | -2.16013300 | 2.39793200  |
| C | 2.37212200  | -0.40046900 | 4.04902700  |
| H | 3.02613000  | -0.65280100 | 2.00888200  |
| C | 3.20426800  | 2.09787700  | 1.03672800  |
| C | 1.00411600  | 3.32076100  | 1.35896100  |
| H | 2.11373200  | 2.29529600  | 2.89550400  |
| C | -3.19174400 | 3.61148900  | -1.84938400 |
| H | -1.46562700 | 2.33703000  | -1.47599000 |
| H | -2.01746400 | 3.25112300  | -0.07429200 |
| C | -5.31165700 | 2.86127400  | -0.68154400 |
| H | -5.10064800 | 1.06105400  | 0.50661400  |
| H | -4.23101500 | 2.45093700  | 1.14848800  |
| C | -4.85624200 | -2.97071600 | -0.02725600 |
| H | -3.09050600 | -2.18242700 | -1.00105500 |
| H | -4.45173600 | -1.06648500 | -0.97398200 |
| C | -3.58589700 | -3.37524500 | 2.12030600  |
| H | -1.75734400 | -2.60905100 | 1.24769700  |
| H | -2.26770900 | -1.76127100 | 2.70745900  |
| C | 2.53263400  | -3.17948300 | 3.01996400  |
| H | 1.42389600  | -2.37255600 | 1.33264100  |

|    |             |             |             |
|----|-------------|-------------|-------------|
| H  | 0.58004600  | -2.26321900 | 2.88063300  |
| C  | 3.34066400  | -1.42825700 | 4.66229200  |
| H  | 2.78871400  | 0.60812000  | 4.15875300  |
| H  | 1.43184500  | -0.41611600 | 4.61855000  |
| C  | 3.95331300  | 3.44021300  | 1.09691600  |
| H  | 2.98648000  | 1.84588700  | -0.00969200 |
| H  | 3.85600200  | 1.30307000  | 1.41839900  |
| C  | 1.76217800  | 4.65875700  | 1.41735800  |
| H  | 0.67628200  | 3.13191500  | 0.32709000  |
| H  | 0.09694100  | 3.39169300  | 1.97224100  |
| C  | -4.48624200 | 4.06482800  | -1.15832400 |
| H  | -3.44128600 | 3.08132800  | -2.78010900 |
| H  | -2.58841200 | 4.48170200  | -2.13820600 |
| H  | -5.66744300 | 2.29663900  | -1.55591500 |
| H  | -6.20665400 | 3.19939100  | -0.14343100 |
| C  | -4.16470500 | -4.02005700 | 0.85387800  |
| H  | -5.22257300 | -3.43128800 | -0.95320300 |
| H  | -5.73926500 | -2.57820100 | 0.49944100  |
| H  | -3.05292400 | -4.12228300 | 2.72264000  |
| H  | -4.40847400 | -2.99757700 | 2.74605600  |
| C  | 2.82322900  | -2.86421000 | 4.49445500  |
| H  | 3.47408000  | -3.16878100 | 2.45232900  |
| H  | 2.11989600  | -4.19131800 | 2.91905400  |
| H  | 4.32085500  | -1.33602100 | 4.17211300  |
| H  | 3.49979300  | -1.19925800 | 5.72409800  |
| C  | 3.07187700  | 4.60210700  | 0.61989100  |
| H  | 4.86503300  | 3.37679400  | 0.48993200  |
| H  | 4.27785700  | 3.63233300  | 2.13071900  |
| H  | 1.11725500  | 5.46348700  | 1.04124200  |
| H  | 1.98617800  | 4.90232100  | 2.46673200  |
| H  | -5.08207000 | 4.68932600  | -1.83602100 |
| H  | -4.23341300 | 4.69591700  | -0.29298400 |
| H  | -3.35226100 | -4.49024000 | 0.28197500  |
| H  | -4.86874800 | -4.81865000 | 1.12055800  |
| H  | 3.54956200  | -3.57877700 | 4.90215700  |
| H  | 1.90042000  | -2.98688000 | 5.08153100  |
| H  | 2.84098600  | 4.46793700  | -0.44699000 |
| H  | 3.61197300  | 5.55341200  | 0.70774500  |
| C  | 1.67996100  | -0.73779800 | -1.64543500 |
| O  | 2.37905200  | 0.33571200  | -2.23987500 |
| N  | 2.42576100  | -1.81361700 | -1.50740200 |
| C  | 3.64046700  | -0.14790400 | -2.46679100 |
| C  | 3.67503900  | -1.47604000 | -2.00807000 |
| C  | 4.72831700  | 0.50107700  | -3.02800900 |
| C  | 4.86175300  | -2.20935100 | -2.11151000 |
| C  | 5.91077900  | -0.24496400 | -3.12392800 |
| H  | 4.66631200  | 1.52761800  | -3.37584800 |
| C  | 5.97273400  | -1.57398900 | -2.67293100 |
| H  | 4.90854400  | -3.23793200 | -1.76650700 |
| H  | 6.79482200  | 0.21438600  | -3.55767200 |
| H  | 6.90783200  | -2.12026000 | -2.76583200 |
| C  | -0.04584800 | -0.92226500 | -2.47005000 |
| C  | -0.55954500 | -2.25247800 | -2.67737100 |
| C  | -0.25131100 | 0.03400600  | -3.45993300 |
| C  | -0.36882000 | -3.30091300 | -1.73794700 |
| C  | -1.30487700 | -2.54077500 | -3.87087200 |
| C  | -0.98497700 | -0.25804900 | -4.63187900 |
| H  | 0.18057900  | 1.02302800  | -3.34259700 |
| C  | -0.89094000 | -4.56017400 | -1.95194800 |
| H  | 0.22557400  | -3.09585200 | -0.85495800 |
| C  | -1.83358900 | -3.84722400 | -4.05920000 |
| C  | -1.50692300 | -1.51589500 | -4.83510700 |
| H  | -1.12910900 | 0.52084200  | -5.37722400 |
| C  | -1.63597200 | -4.83695600 | -3.12265700 |
| H  | -0.71886300 | -5.34879900 | -1.22367500 |
| H  | -2.39882500 | -4.05189400 | -4.96611800 |
| H  | -2.06799100 | -1.74671400 | -5.73776100 |
| H  | -2.04277900 | -5.83204900 | -3.28391500 |
| Pd | 0.10586700  | -0.21478900 | -0.46715900 |

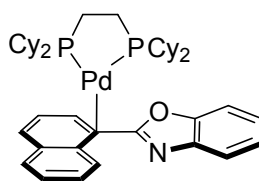

**Inter8**

|   |             |             |             |
|---|-------------|-------------|-------------|
| P | 2.14209400  | -1.26231700 | 0.42137100  |
| P | -0.19597100 | 0.78134400  | 1.68138500  |
| C | 1.92294000  | -1.08887700 | 2.28910500  |
| C | 2.13755400  | -3.13406400 | 0.18502300  |
| C | 3.95130300  | -0.80314000 | 0.15209200  |
| C | 1.26962000  | 0.23512800  | 2.74075700  |
| C | -0.21846000 | 2.64990600  | 1.91782600  |
| C | -1.68967000 | 0.19611200  | 2.67099600  |
| H | 1.28843100  | -1.92855500 | 2.59398200  |
| H | 2.88331900  | -1.22377100 | 2.80340700  |
| C | 0.70792200  | -3.70306000 | 0.31443900  |
| C | 3.12500100  | -3.93503000 | 1.05909900  |
| H | 2.43425200  | -3.25889700 | -0.86670100 |
| C | 4.40496000  | -1.16255900 | -1.27883800 |
| C | 4.19262000  | 0.69707200  | 0.42792100  |
| H | 4.55653800  | -1.38211700 | 0.86598800  |
| H | 0.97560000  | 0.16058600  | 3.79573000  |
| H | 2.00626100  | 1.04441900  | 2.67968800  |
| C | 0.94260400  | 3.32021300  | 1.15164900  |
| C | -0.27433200 | 3.15461300  | 3.37475100  |
| H | -1.14476500 | 2.95492100  | 1.40974700  |
| C | -2.99212200 | 0.84982600  | 2.15902900  |
| C | -1.80837200 | -1.34282400 | 2.62906500  |
| H | -1.53562400 | 0.49653500  | 3.71867200  |
| C | 0.66842500  | -5.20474500 | -0.01629600 |
| H | 0.02617600  | -3.14770400 | -0.34039900 |
| H | 0.34291900  | -3.55679400 | 1.34137800  |
| C | 3.07878900  | -5.43812300 | 0.72783900  |
| H | 4.14920500  | -3.56438700 | 0.93074300  |
| H | 2.87171800  | -3.79654900 | 2.12001700  |
| C | 5.86381900  | -0.75278100 | -1.54235700 |
| H | 3.74735300  | -0.65279200 | -1.99655800 |
| H | 4.29547500  | -2.23822400 | -1.46147800 |
| C | 5.65379900  | 1.10110700  | 0.16342000  |
| H | 3.52548400  | 1.28998400  | -0.21314800 |
| H | 3.92989900  | 0.94010000  | 1.46482800  |
| C | 0.84522000  | 4.85387400  | 1.21550300  |
| H | 0.93994000  | 2.98660200  | 0.10820500  |
| H | 1.90428100  | 3.00696800  | 1.58429100  |
| C | -0.37102300 | 4.69040600  | 3.43233200  |
| H | -1.12601500 | 2.71629000  | 3.90887700  |
| H | 0.63092200  | 2.83202600  | 3.90959700  |
| C | -4.22773000 | 0.33772200  | 2.92021800  |
| H | -3.11042900 | 0.63997100  | 1.08738800  |
| H | -2.93718100 | 1.94025000  | 2.25828700  |
| C | -3.04710600 | -1.84622700 | 3.39015600  |
| H | -1.86775100 | -1.66731000 | 1.58091500  |
| H | -0.90842300 | -1.80683200 | 3.05256600  |
| C | 1.65590100  | -6.00268500 | 0.84772200  |
| H | 0.91930500  | -5.34599700 | -1.07818100 |
| H | -0.35158600 | -5.58721600 | 0.11713000  |
| H | 3.44345000  | -5.59104900 | -0.29869500 |
| H | 3.76504700  | -5.98518600 | 1.38732600  |
| C | 6.09264900  | 0.73845200  | -1.26165800 |
| H | 6.13309300  | -0.99333000 | -2.57889500 |
| H | 6.52958600  | -1.34914300 | -0.90060000 |
| H | 5.77571000  | 2.17763000  | 0.33933100  |
| H | 6.30843200  | 0.59012700  | 0.88526600  |
| C | 0.77558000  | 5.36176800  | 2.66309600  |
| H | -0.05162600 | 5.17548800  | 0.66780400  |
| H | 1.70262600  | 5.30023300  | 0.69555200  |
| H | -1.33124800 | 5.00392400  | 2.99693600  |
| H | -0.37859100 | 5.02357000  | 4.47849900  |
| C | -4.33446900 | -1.19214500 | 2.87024700  |

|    |             |             |             |
|----|-------------|-------------|-------------|
| H  | -5.13165400 | 0.79779500  | 2.50102300  |
| H  | -4.16879700 | 0.66308600  | 3.97007400  |
| H  | -3.11142200 | -2.93887000 | 3.30596800  |
| H  | -2.93134100 | -1.62095200 | 4.46119600  |
| H  | 1.64276000  | -7.06263100 | 0.56346800  |
| H  | 1.33566300  | -5.95699400 | 1.89948100  |
| H  | 5.51429600  | 1.33596200  | -1.98150000 |
| H  | 7.14798200  | 0.99857700  | -1.41354100 |
| H  | 0.65558400  | 6.45272100  | 2.67994800  |
| H  | 1.72717300  | 5.14466000  | 3.17187400  |
| H  | -4.51274300 | -1.50959800 | 1.83321900  |
| H  | -5.19727500 | -1.53351900 | 3.45685700  |
| C  | -2.18481600 | -0.11244200 | -2.00349200 |
| O  | -2.08319200 | -1.48226300 | -2.24175800 |
| N  | -3.37541200 | 0.26312000  | -1.61493200 |
| C  | -3.32674400 | -1.98020600 | -1.95944100 |
| C  | -4.13386600 | -0.90097900 | -1.57261700 |
| C  | -3.77010600 | -3.29122000 | -2.02981900 |
| C  | -5.47044300 | -1.12475700 | -1.22918400 |
| C  | -5.10947000 | -3.50262900 | -1.68179300 |
| H  | -3.11937600 | -4.10237000 | -2.34006300 |
| C  | -5.94086100 | -2.43915600 | -1.28945500 |
| H  | -6.11362800 | -0.30173400 | -0.93357300 |
| H  | -5.51390000 | -4.51014000 | -1.71895400 |
| H  | -6.97559300 | -2.64610900 | -1.03046200 |
| C  | -0.96873500 | 0.67001200  | -2.24071000 |
| C  | -1.00368400 | 2.13864800  | -2.36096800 |
| C  | 0.18256000  | -0.04334400 | -2.73028100 |
| C  | -2.09186200 | 2.93196500  | -1.93277500 |
| C  | 0.12108000  | 2.80245800  | -2.94542700 |
| C  | 1.26110100  | 0.68388200  | -3.34388900 |
| H  | 0.08291500  | -1.09599900 | -2.96973700 |
| C  | -2.06810200 | 4.31492300  | -2.05606300 |
| H  | -2.95851000 | 2.44178100  | -1.50946200 |
| C  | 0.11649100  | 4.21039400  | -3.05609400 |
| C  | 1.24051100  | 2.04147300  | -3.43627500 |
| H  | 2.09440200  | 0.11687500  | -3.75208600 |
| C  | -0.95742900 | 4.96576600  | -2.61651600 |
| H  | -2.92349700 | 4.89465400  | -1.71762700 |
| H  | 0.98088800  | 4.69606100  | -3.50443100 |
| H  | 2.06212500  | 2.57883300  | -3.90443800 |
| H  | -0.94356300 | 6.04836800  | -2.71254700 |
| Pd | 0.34328300  | -0.01156000 | -0.52206500 |

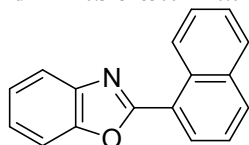

**P1**

|   |             |             |             |
|---|-------------|-------------|-------------|
| C | 0.60228000  | 0.54266300  | -0.02741400 |
| O | 1.06889400  | -0.72555100 | 0.26726200  |
| N | 1.53843400  | 1.41020000  | -0.29083800 |
| C | 2.43411600  | -0.62204800 | 0.17137400  |
| C | 2.72879100  | 0.70403100  | -0.17224100 |
| C | 3.39223400  | -1.60484700 | 0.36542900  |
| C | 4.06020500  | 1.09820400  | -0.33912800 |
| C | 4.71809100  | -1.19671200 | 0.19683200  |
| H | 3.12926300  | -2.62300800 | 0.63198200  |
| C | 5.04355700  | 0.12855900  | -0.14874200 |
| H | 4.30770300  | 2.12056100  | -0.60599300 |
| H | 5.51573800  | -1.92064800 | 0.33610300  |
| H | 6.08872200  | 0.39906500  | -0.26933200 |
| C | -0.83734200 | 0.82143700  | 0.02295300  |
| C | -1.87717800 | -0.17519000 | -0.03076500 |
| C | -1.17544800 | 2.16669300  | 0.11833200  |
| C | -1.65328400 | -1.57354100 | -0.17739300 |
| C | -3.24178700 | 0.27537100  | 0.04299500  |
| C | -2.51521200 | 2.58934300  | 0.18246700  |
| H | -0.37312600 | 2.89544900  | 0.14859300  |
| C | -2.70369300 | -2.46401200 | -0.22942200 |
| H | -0.64135400 | -1.94565700 | -0.24852400 |

|   |             |             |             |
|---|-------------|-------------|-------------|
| C | -4.29849800 | -0.67380400 | -0.00712300 |
| C | -3.52912700 | 1.66013000  | 0.15322800  |
| H | -2.73858600 | 3.64916900  | 0.26327000  |
| C | -4.04138000 | -2.01741500 | -0.13832400 |
| H | -2.49808100 | -3.52497300 | -0.34396800 |
| H | -5.32139000 | -0.31001200 | 0.05510300  |
| H | -4.56902100 | 1.97284800  | 0.21001000  |
| H | -4.85802000 | -2.73295700 | -0.17781800 |

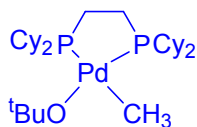

**Inter4s**

|   |             |             |             |
|---|-------------|-------------|-------------|
| P | -1.29897900 | 0.08138500  | -0.98772400 |
| P | 1.88433500  | -0.11679600 | -0.40047400 |
| C | -0.16038100 | -0.26736000 | -2.44037400 |
| C | -2.65403100 | -1.20325500 | -1.08988700 |
| C | -2.15268100 | 1.69814600  | -1.42452900 |
| C | 1.29181700  | 0.18043800  | -2.16671100 |
| C | 3.21368800  | 1.18775400  | -0.15742000 |
| C | 2.84354000  | -1.73020700 | -0.52893600 |
| H | -0.19023400 | -1.35011000 | -2.60343700 |
| H | -0.52750400 | 0.19898900  | -3.36327300 |
| C | -2.13269900 | -2.59623300 | -0.67691400 |
| C | -3.41406900 | -1.26651500 | -2.43021500 |
| H | -3.34199000 | -0.88284900 | -0.29621200 |
| C | -3.29533000 | 2.00452600  | -0.43074700 |
| C | -1.13864100 | 2.86209100  | -1.46504900 |
| H | -2.57959300 | 1.58519300  | -2.43318200 |
| H | 1.98015500  | -0.29697600 | -2.87550600 |
| H | 1.37768300  | 1.25990300  | -2.33052700 |
| C | 2.58912900  | 2.58345300  | 0.05316300  |
| C | 4.30784800  | 1.22889700  | -1.24494900 |
| H | 3.68805600  | 0.90428300  | 0.79243000  |
| C | 3.67258000  | -2.02543600 | 0.73958100  |
| C | 1.90777600  | -2.91644100 | -0.84472800 |
| H | 3.53642100  | -1.60977900 | -1.37631600 |
| C | -3.27336900 | -3.62795900 | -0.63882600 |
| H | -1.65276300 | -2.52153300 | 0.30451400  |
| H | -1.36860300 | -2.94034200 | -1.39023300 |
| C | -4.54696800 | -2.30853500 | -2.38547200 |
| H | -3.83163100 | -0.28628000 | -2.69033800 |
| H | -2.71506400 | -1.53435900 | -3.23687100 |
| C | -3.95532400 | 3.36460800  | -0.71439600 |
| H | -2.89358300 | 1.97110000  | 0.58913900  |
| H | -4.05852700 | 1.21928400  | -0.48087800 |
| C | -1.81834600 | 4.20946700  | -1.75973400 |
| H | -0.62410900 | 2.91979200  | -0.49633900 |
| H | -0.36887200 | 2.67194700  | -2.22403900 |
| C | 3.66524000  | 3.63362200  | 0.37508400  |
| H | 1.84434900  | 2.53446900  | 0.85546400  |
| H | 2.05278100  | 2.89233200  | -0.85586100 |
| C | 5.37774800  | 2.28754600  | -0.91997300 |
| H | 4.78505800  | 0.24778400  | -1.35494200 |
| H | 3.85287100  | 1.46858200  | -2.21670800 |
| C | 4.44556000  | -3.35007900 | 0.61685500  |
| H | 2.99754500  | -2.07285200 | 1.60279500  |
| H | 4.38032100  | -1.21197700 | 0.93892500  |
| C | 2.68393000  | -4.23963700 | -0.96229500 |
| H | 1.15638300  | -2.99882900 | -0.04797600 |
| H | 1.35998800  | -2.73468600 | -1.77722300 |
| C | -4.02835700 | -3.69373800 | -1.97423500 |
| H | -3.97435400 | -3.35462300 | 0.16286300  |
| H | -2.87120900 | -4.61548100 | -0.37825100 |
| H | -5.30805800 | -1.97780700 | -1.66383400 |
| H | -5.04356900 | -2.35880700 | -3.36329700 |
| C | -2.93128700 | 4.50709800  | -0.74692200 |
| H | -4.72361000 | 3.56117800  | 0.04411700  |
| H | -4.47701800 | 3.32242600  | -1.68286500 |
| H | -1.06681200 | 5.00964100  | -1.75246400 |

|    |             |             |             |
|----|-------------|-------------|-------------|
| H  | -2.24483400 | 4.18959600  | -2.77393900 |
| C  | 4.75759300  | 3.67526500  | -0.70366400 |
| H  | 4.12169100  | 3.39520800  | 1.34686600  |
| H  | 3.19794500  | 4.62041400  | 0.48423800  |
| H  | 5.91729400  | 1.98511800  | -0.01045400 |
| H  | 6.12088200  | 2.32099300  | -1.72700000 |
| C  | 3.51171700  | -4.52490900 | 0.29790900  |
| H  | 4.99556800  | -3.53969400 | 1.54719000  |
| H  | 5.20007700  | -3.25883300 | -0.17905400 |
| H  | 1.98141600  | -5.06061200 | -1.15421700 |
| H  | 3.35409800  | -4.19110900 | -1.83375200 |
| H  | -4.86084000 | -4.40583800 | -1.90804100 |
| H  | -3.35293400 | -4.07421400 | -2.75557800 |
| H  | -2.48865900 | 4.62731500  | 0.25254200  |
| H  | -3.42487600 | 5.45686100  | -0.98971700 |
| H  | 5.53559600  | 4.39980800  | -0.43211500 |
| H  | 4.31906500  | 4.02654300  | -1.64978600 |
| H  | 2.83328200  | -4.69026900 | 1.14752900  |
| H  | 4.08966200  | -5.44927500 | 0.17282100  |
| O  | -1.77187800 | -0.00558900 | 1.94553800  |
| C  | -2.22285000 | 0.10721700  | 3.26755500  |
| C  | -3.76423300 | -0.03132100 | 3.20608200  |
| H  | -4.22466300 | 0.04914800  | 4.19981000  |
| H  | -4.18889400 | 0.75025600  | 2.56553100  |
| H  | -4.03408500 | -1.00425800 | 2.77862200  |
| C  | -1.67764400 | -1.01804900 | 4.17534200  |
| H  | -1.89248000 | -1.99178300 | 3.71882700  |
| H  | -0.59610100 | -0.93612800 | 4.30608900  |
| H  | -2.14177300 | -0.99581700 | 5.17076200  |
| C  | -1.88230300 | 1.49051900  | 3.86636700  |
| H  | -2.31772100 | 2.28102100  | 3.24298700  |
| H  | -2.27062800 | 1.60678400  | 4.88733400  |
| H  | -0.79964300 | 1.64690700  | 3.89403800  |
| Pd | 0.07427400  | -0.01483200 | 1.00130500  |
| C  | 1.31646500  | -0.08722400 | 2.68736600  |
| H  | 0.88934000  | 0.59089900  | 3.42853300  |
| H  | 1.28952200  | -1.11093600 | 3.07661600  |
| H  | 2.35959600  | 0.19793400  | 2.51628600  |

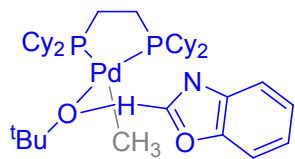

### Inter5s

|   |             |             |             |
|---|-------------|-------------|-------------|
| P | 1.48479300  | -1.16417800 | -1.03113900 |
| P | 0.91863700  | 1.99830700  | -0.50486500 |
| C | 2.15273100  | 0.07922500  | -2.27634300 |
| C | 2.96846700  | -2.24770000 | -0.63195400 |
| C | 0.36045900  | -2.27551300 | -2.04439800 |
| C | 1.41896600  | 1.43495600  | -2.22958500 |
| C | -0.53216200 | 3.14294800  | -0.83142000 |
| C | 2.30643200  | 3.14606300  | 0.03421500  |
| H | 3.21239600  | 0.22320000  | -2.04252100 |
| H | 2.10995800  | -0.32949900 | -3.29333400 |
| C | 4.03972400  | -1.47060500 | 0.16254700  |
| C | 3.60965300  | -2.97728200 | -1.83116800 |
| H | 2.54857300  | -3.00438600 | 0.04562500  |
| C | -0.08177200 | -3.50862700 | -1.22554200 |
| C | -0.86825400 | -1.50092300 | -2.56989400 |
| H | 0.93837500  | -2.61838900 | -2.91691600 |
| H | 2.01908000  | 2.21216300  | -2.71927000 |
| H | 0.48217300  | 1.36076200  | -2.79202700 |
| C | -1.78897200 | 2.34685700  | -1.24429600 |
| C | -0.25646300 | 4.29011600  | -1.82706800 |
| H | -0.74289900 | 3.58868000  | 0.15016600  |
| C | 1.96518200  | 3.88918500  | 1.34406900  |
| C | 3.64617000  | 2.39340200  | 0.17676500  |
| H | 2.42025700  | 3.89006600  | -0.76877800 |
| C | 5.18229900  | -2.39451900 | 0.61661700  |

|    |             |             |             |
|----|-------------|-------------|-------------|
| H  | 3.58067100  | -0.98062000 | 1.02789700  |
| H  | 4.46253100  | -0.67399800 | -0.46630400 |
| C  | 4.76045200  | -3.89515600 | -1.37910200 |
| H  | 2.86277100  | -3.57156200 | -2.36900600 |
| H  | 3.99852500  | -2.23708000 | -2.54590100 |
| C  | -1.03735600 | -4.40608600 | -2.03081700 |
| H  | -0.55693000 | -3.16658800 | -0.29824900 |
| H  | 0.79300300  | -4.09849700 | -0.92344800 |
| C  | -1.80026000 | -2.41233700 | -3.38668900 |
| H  | -1.43535500 | -1.08799300 | -1.72697500 |
| H  | -0.54700500 | -0.65527600 | -3.19304900 |
| C  | -3.01025600 | 3.27095500  | -1.38652500 |
| H  | -1.98930500 | 1.55494200  | -0.51565100 |
| H  | -1.61319400 | 1.84644700  | -2.20760400 |
| C  | -1.48563800 | 5.20635300  | -1.97402800 |
| H  | 0.60594600  | 4.88881400  | -1.50987000 |
| H  | -0.00484400 | 3.87081200  | -2.81183600 |
| C  | 3.10682400  | 4.82335700  | 1.78076400  |
| H  | 1.77345400  | 3.15095200  | 2.13308300  |
| H  | 1.04332100  | 4.47160900  | 1.22980200  |
| C  | 4.78336200  | 3.33028600  | 0.61990600  |
| H  | 3.52704000  | 1.58830100  | 0.91408800  |
| H  | 3.91975700  | 1.91568500  | -0.77162600 |
| C  | 5.81888200  | -3.13168200 | -0.57036500 |
| H  | 4.78737500  | -3.12881600 | 1.33348200  |
| H  | 5.93959300  | -1.80990600 | 1.15453500  |
| H  | 4.34795900  | -4.70584300 | -0.76090900 |
| H  | 5.21821200  | -4.37307100 | -2.25486900 |
| C  | -2.24818900 | -3.62732400 | -2.56285800 |
| H  | -1.36736800 | -5.24275100 | -1.40172100 |
| H  | -0.49104300 | -4.84931600 | -2.87800400 |
| H  | -2.67284800 | -1.83492900 | -3.71698400 |
| H  | -1.28155500 | -2.75191100 | -4.29664800 |
| C  | -2.74085200 | 4.41737400  | -2.37198300 |
| H  | -3.26281900 | 3.68888100  | -0.40097700 |
| H  | -3.87895900 | 2.68247800  | -1.70577100 |
| H  | -1.66691500 | 5.71814000  | -1.01744200 |
| H  | -1.27407900 | 5.99065400  | -2.71226300 |
| C  | 4.43529700  | 4.06803300  | 1.91942900  |
| H  | 2.84067400  | 5.30774800  | 2.72857700  |
| H  | 3.22275700  | 5.62832200  | 1.03954500  |
| H  | 5.70770100  | 2.75157900  | 0.74274600  |
| H  | 4.97829500  | 4.06596700  | -0.17474600 |
| H  | 6.59786100  | -3.82018900 | -0.21911700 |
| H  | 6.31852000  | -2.40186100 | -1.22514900 |
| H  | -2.85784800 | -3.27385000 | -1.72133400 |
| H  | -2.88513600 | -4.28486600 | -3.16898100 |
| H  | -3.60770300 | 5.08800900  | -2.42598300 |
| H  | -2.60229500 | 4.00264900  | -3.38177800 |
| H  | 4.35510600  | 3.34002000  | 2.73995600  |
| H  | 5.24171500  | 4.76048600  | 2.19181800  |
| C  | -3.16019000 | -1.15734300 | 1.02129700  |
| O  | -4.03040100 | -0.95350200 | 2.06604900  |
| N  | -3.66820400 | -0.99637600 | -0.16070500 |
| C  | -5.21774500 | -0.62832000 | 1.46086500  |
| C  | -5.00358800 | -0.65324900 | 0.07583600  |
| C  | -6.43707700 | -0.32147700 | 2.04783000  |
| C  | -6.05524700 | -0.35772600 | -0.79603400 |
| C  | -7.47973100 | -0.02699500 | 1.16522700  |
| H  | -6.56983700 | -0.31139000 | 3.12453800  |
| C  | -7.29150500 | -0.04515300 | -0.22959200 |
| H  | -5.90815100 | -0.37651900 | -1.87154700 |
| H  | -8.45858800 | 0.22089100  | 1.56597300  |
| H  | -8.13152600 | 0.18884700  | -0.87781800 |
| H  | -2.13039100 | -1.41373500 | 1.29520100  |
| C  | 0.17077800  | -2.14853900 | 2.94361700  |
| Pd | 0.44417800  | 0.14422100  | 0.76089800  |
| O  | -0.21360900 | -1.61862900 | 1.69658900  |
| C  | -0.77736500 | -1.68438000 | 4.07562300  |
| H  | -0.70414100 | -0.60415600 | 4.22942400  |
| H  | -1.81725400 | -1.91959600 | 3.82121500  |
| H  | -0.54197200 | -2.18015300 | 5.02715300  |
| C  | 0.07725800  | -3.68781800 | 2.82672000  |
| H  | 0.74859200  | -4.04871100 | 2.03868100  |
| H  | 0.34540200  | -4.18856500 | 3.76641500  |



|   |             |             |            |
|---|-------------|-------------|------------|
| H | -0.94424000 | -3.98278200 | 2.56037400 |
| C | 1.61889200  | -1.76797700 | 3.31310200 |
| H | 1.72319300  | -0.67806400 | 3.37099600 |
| H | 1.92013700  | -2.19490300 | 4.27901200 |
| H | 2.31189100  | -2.13629400 | 2.54808700 |
| C | -0.46787500 | 1.30688800  | 2.23659600 |
| H | -1.41614000 | 0.80920100  | 2.45112000 |
| H | 0.17273700  | 1.26544500  | 3.12450200 |
| H | -0.65733500 | 2.35428600  | 1.98481200 |

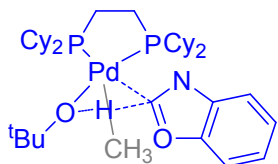

**TS5-6s**

|   |             |             |             |
|---|-------------|-------------|-------------|
| P | 0.74125900  | -1.58815700 | -1.50916800 |
| P | 0.44174400  | 1.68301200  | -1.45517100 |
| C | 1.10670200  | -0.61092600 | -3.07435500 |
| C | 2.28355800  | -2.62070300 | -1.21621000 |
| C | -0.54864800 | -2.83730800 | -2.05872400 |
| C | 0.39450700  | 0.75500800  | -3.09010400 |
| C | -1.07408900 | 2.78805800  | -1.52457100 |
| C | 1.89988200  | 2.85913500  | -1.64914200 |
| H | 2.19073500  | -0.46678300 | -3.11976300 |
| H | 0.82753900  | -1.18481000 | -3.96632100 |
| C | 3.48861500  | -1.73486300 | -0.83319100 |
| C | 2.65973200  | -3.59605300 | -2.35142900 |
| H | 2.01836900  | -3.20213400 | -0.32268300 |
| C | -0.86261000 | -3.85121000 | -0.93665100 |
| C | -1.83895800 | -2.14564000 | -2.54947900 |
| H | -0.11407200 | -3.38157900 | -2.91120700 |
| H | 0.80004400  | 1.39258800  | -3.88581500 |
| H | -0.66798200 | 0.60978300  | -3.31218400 |
| C | -2.36516500 | 1.97690200  | -1.28114800 |
| C | -1.18732500 | 3.65055200  | -2.80030200 |
| H | -0.95186300 | 3.46235400  | -0.66609400 |
| C | 1.94108900  | 3.96294500  | -0.57099000 |
| C | 3.24333500  | 2.10218500  | -1.69275800 |
| H | 1.75155500  | 3.34176000  | -2.62771200 |
| C | 4.72054200  | -2.58169400 | -0.47173400 |
| H | 3.21685000  | -1.08367700 | 0.00460000  |
| H | 3.75147100  | -1.07824300 | -1.67522900 |
| C | 3.89973700  | -4.43331800 | -1.98809700 |
| H | 1.82492200  | -4.26793400 | -2.57942900 |
| H | 2.86648100  | -3.02754400 | -3.27043800 |
| C | -1.92325000 | -4.87184800 | -1.38476900 |
| H | -1.22501700 | -3.30903400 | -0.05588700 |
| H | 0.04784100  | -4.38214800 | -0.63203400 |
| C | -2.89437400 | -3.17657800 | -2.98964600 |
| H | -2.24859500 | -1.53662800 | -1.73624800 |
| H | -1.61635800 | -1.47658600 | -3.39158600 |
| C | -3.59947600 | 2.89231400  | -1.23879000 |
| H | -2.27890900 | 1.41417700  | -0.34704400 |
| H | -2.49723400 | 1.23639500  | -2.08332600 |
| C | -2.43019000 | 4.55827100  | -2.74648600 |
| H | -0.28972800 | 4.26586800  | -2.93827800 |
| H | -1.26235900 | 2.99852300  | -3.68213200 |
| C | 3.12497900  | 4.92022300  | -0.79441000 |
| H | 2.03337700  | 3.49803400  | 0.41775200  |
| H | 1.00612900  | 4.53484000  | -0.56511400 |
| C | 4.43112100  | 3.05876200  | -1.89833500 |
| H | 3.37049800  | 1.55056100  | -0.75202300 |
| H | 3.23838300  | 1.35696500  | -2.49647300 |
| C | 5.09405600  | -3.54994900 | -1.60281900 |
| H | 4.50811800  | -3.15408700 | 0.44251100  |
| H | 5.56599300  | -1.92231000 | -0.23684500 |
| H | 3.65010100  | -5.09346300 | -1.14461000 |
| H | 4.16217800  | -5.08811900 | -2.82904500 |
| C | -3.20383200 | -4.17859700 | -1.86876800 |
| H | -2.14864600 | -5.55168300 | -0.55344400 |

|    |             |             |             |
|----|-------------|-------------|-------------|
| H  | -1.51467300 | -5.49372700 | -2.19635500 |
| H  | -3.80859200 | -2.65299700 | -3.29812100 |
| H  | -2.53058500 | -3.71910900 | -3.87583700 |
| C  | -3.71464500 | 3.75225900  | -2.50513100 |
| H  | -3.53056800 | 3.54708700  | -0.35802600 |
| H  | -4.49907500 | 2.28146500  | -1.10003700 |
| H  | -2.30391300 | 5.29178000  | -1.93660500 |
| H  | -2.50443300 | 5.13274900  | -3.67884300 |
| C  | 4.46072100  | 4.16615400  | -0.83632300 |
| H  | 3.13693400  | 5.67718200  | -0.00045700 |
| H  | 2.98241900  | 5.46162000  | -1.74151000 |
| H  | 5.36767300  | 2.48708000  | -1.88357700 |
| H  | 4.35925000  | 3.51530600  | -2.89672500 |
| H  | 5.94738300  | -4.17309400 | -1.30658400 |
| H  | 5.41802000  | -2.97361300 | -2.48260200 |
| H  | -3.66152300 | -3.64517300 | -1.02567200 |
| H  | -3.93268900 | -4.92278000 | -2.21498000 |
| H  | -4.57553100 | 4.42861800  | -2.43201300 |
| H  | -3.90156300 | 3.10131700  | -3.37260200 |
| H  | 4.65567800  | 3.71912300  | 0.14944700  |
| H  | 5.28608800  | 4.86127500  | -1.03452100 |
| C  | -1.95910200 | -0.87184100 | 1.45421100  |
| O  | -2.97671800 | -1.33420800 | 0.54570600  |
| N  | -2.50044500 | -0.12236200 | 2.38460300  |
| C  | -4.15363500 | -0.81157200 | 0.99349300  |
| C  | -3.87138600 | -0.05742600 | 2.14269200  |
| C  | -5.43309500 | -0.94413400 | 0.46618300  |
| C  | -4.90659500 | 0.59909100  | 2.81565400  |
| C  | -6.46033700 | -0.28064000 | 1.14679100  |
| H  | -5.62670800 | -1.53433600 | -0.42498400 |
| C  | -6.20007100 | 0.47700800  | 2.30267900  |
| H  | -4.70239500 | 1.18362200  | 3.70829800  |
| H  | -7.47943700 | -0.35545600 | 0.77586600  |
| H  | -7.02495700 | 0.97608600  | 2.80507000  |
| H  | -0.37911500 | -1.54605600 | 1.75526700  |
| C  | 1.09662400  | -1.94320600 | 3.14482300  |
| Pd | 0.37306600  | 0.13608700  | 0.19749900  |
| O  | 0.64237800  | -1.67637000 | 1.80092500  |
| C  | 0.53996400  | -3.31602600 | 3.56015000  |
| H  | 0.84820500  | -4.08539400 | 2.84344300  |
| H  | 0.89875900  | -3.60464900 | 4.55572600  |
| H  | -0.55510800 | -3.29126500 | 3.58728900  |
| C  | 2.62601100  | -1.97872300 | 3.08659400  |
| H  | 3.01559000  | -1.01533100 | 2.73803600  |
| H  | 3.05025500  | -2.18301300 | 4.07656200  |
| H  | 2.96934400  | -2.75958300 | 2.39841100  |
| C  | 0.61814900  | -0.85633800 | 4.11958300  |
| H  | 0.89927000  | -1.11443800 | 5.14830100  |
| H  | 1.07133800  | 0.10891300  | 3.87460800  |
| H  | -0.46909200 | -0.73944400 | 4.07237700  |
| C  | 0.26647300  | 1.67197500  | 1.60298100  |
| H  | -0.47533400 | 1.29288300  | 2.30712100  |
| H  | 1.26555200  | 1.73114700  | 2.05005300  |
| H  | -0.03330000 | 2.66200500  | 1.25239700  |

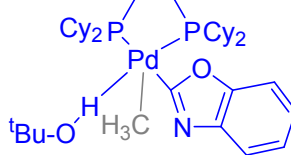

**Inter6s**

|   |             |             |             |
|---|-------------|-------------|-------------|
| P | -0.03846500 | -1.08653500 | 1.51574600  |
| P | 2.50378800  | 0.38366800  | 0.09104300  |
| C | 1.45754400  | -0.64301900 | 2.57032300  |
| C | -1.50611400 | -0.48017400 | 2.51924800  |
| C | -0.13859800 | -2.96083300 | 1.64406200  |
| C | 2.75650000  | -0.44497700 | 1.76100800  |
| C | 3.97030800  | -0.20497200 | -0.92213600 |
| C | 2.85192400  | 2.20078600  | 0.41370700  |
| H | 1.20042100  | 0.28750100  | 3.08621700  |
| H | 1.61509300  | -1.39896000 | 3.34965600  |
| C | -1.56644000 | 1.06266900  | 2.56356100  |
| C | -1.62075800 | -1.07633500 | 3.93890600  |



|   |             |             |             |
|---|-------------|-------------|-------------|
| H | -2.37088000 | -0.81500300 | 1.92819400  |
| C | -1.47013600 | -3.49731200 | 1.07468300  |
| C | 1.05805500  | -3.63947700 | 0.94280000  |
| H | -0.08983200 | -3.21039800 | 2.71474200  |
| H | 3.49111200  | 0.11313300  | 2.35466200  |
| H | 3.20600600  | -1.42028000 | 1.54504100  |
| C | 3.78080900  | -1.66930400 | -1.37408700 |
| C | 5.35090900  | -0.00316300 | -0.26244100 |
| H | 3.92975700  | 0.41539800  | -1.82853300 |
| C | 2.96597300  | 3.00643900  | -0.89928700 |
| C | 1.77440200  | 2.82749500  | 1.32608300  |
| H | 3.81859300  | 2.24957300  | 0.93892200  |
| C | -2.83407400 | 1.54664300  | 3.28901600  |
| H | -1.53986700 | 1.48551100  | 1.55430700  |
| H | -0.68850200 | 1.45221100  | 3.10027100  |
| C | -2.88737200 | -0.57875500 | 4.65920100  |
| H | -1.63184700 | -2.17211700 | 3.90584700  |
| H | -0.73812500 | -0.78783700 | 4.52869600  |
| C | -1.54658800 | -5.03122300 | 1.16539100  |
| H | -1.56237700 | -3.18868500 | 0.02624300  |
| H | -2.32159300 | -3.05970000 | 1.60904100  |
| C | 0.97314500  | -5.17382300 | 1.02561400  |
| H | 1.07980000  | -3.32795000 | -0.11044200 |
| H | 2.00277600  | -3.30704600 | 1.39097000  |
| C | 4.92432300  | -2.12180700 | -2.29793700 |
| H | 2.81434300  | -1.77620700 | -1.87964200 |
| H | 3.75208800  | -2.32996100 | -0.49505000 |
| C | 6.48962400  | -0.46763600 | -1.18884100 |
| H | 5.50335500  | 1.04894400  | 0.00656300  |
| H | 5.39714400  | -0.57781000 | 0.67370000  |
| C | 3.25521000  | 4.49229200  | -0.62282800 |
| H | 2.02475700  | 2.91262000  | -1.45555700 |
| H | 3.75652100  | 2.59730400  | -1.53974000 |
| C | 2.06708500  | 4.31263600  | 1.60261400  |
| H | 0.79220000  | 2.73307800  | 0.84477900  |
| H | 1.71980100  | 2.28927200  | 2.28012600  |
| C | -2.95332300 | 0.95400700  | 4.69958400  |
| H | -3.71556600 | 1.26146200  | 2.69689300  |
| H | -2.83156800 | 2.64300900  | 3.33226100  |
| H | -3.77245000 | -0.96587400 | 4.13335800  |
| H | -2.92100800 | -0.99379500 | 5.67496700  |
| C | -0.35547300 | -5.69897600 | 0.46520800  |
| H | -2.49097100 | -5.37656300 | 0.72642100  |
| H | -1.56311700 | -5.33469000 | 2.22315600  |
| H | 1.81979300  | -5.61784800 | 0.48634800  |
| H | 1.07297300  | -5.48592600 | 2.07609600  |
| C | 6.29782900  | -1.92223200 | -1.64103500 |
| H | 4.88096100  | -1.54379900 | -3.23249500 |
| H | 4.78151900  | -3.17390100 | -2.57499500 |
| H | 6.52318000  | 0.18600400  | -2.07276300 |
| H | 7.45320200  | -0.34901500 | -0.67678800 |
| C | 2.19862700  | 5.11362300  | 0.30037700  |
| H | 3.30222700  | 5.03833600  | -1.57350300 |
| H | 4.24789800  | 4.58795200  | -0.15729100 |
| H | 1.26870800  | 4.73083000  | 2.22833500  |
| H | 2.99942400  | 4.40044300  | 2.18111200  |
| H | -3.88672600 | 1.28064300  | 5.17561700  |
| H | -2.13261100 | 1.33530200  | 5.32596500  |
| H | -0.40360900 | -5.48628100 | -0.61249500 |
| H | -0.40962400 | -6.78966400 | 0.57427000  |
| H | 7.09802800  | -2.21216900 | -2.33357500 |
| H | 6.38306100  | -2.58739800 | -0.76852700 |
| H | 1.22795600  | 5.12314500  | -0.21416500 |
| H | 2.45176200  | 6.15884100  | 0.51947400  |
| C | -1.52895400 | -0.54909400 | -1.41378700 |
| O | -1.80485300 | -1.76245500 | -2.05714000 |
| N | -2.57306900 | 0.24271500  | -1.39460200 |
| C | -3.11568400 | -1.68501000 | -2.45533900 |
| C | -3.60610800 | -0.43866400 | -2.04709100 |
| C | -3.87480300 | -2.62535000 | -3.13579000 |
| C | -4.93012600 | -0.09067700 | -2.32699500 |
| C | -5.19913500 | -2.26650200 | -3.41079200 |
| H | -3.46248100 | -3.58215800 | -3.44071400 |
| C | -5.71495900 | -1.02147600 | -3.01268700 |
| H | -5.33306700 | 0.87097100  | -2.02317300 |

|    |             |             |             |
|----|-------------|-------------|-------------|
| H  | -5.83934800 | -2.96406500 | -3.94388300 |
| H  | -6.74813800 | -0.77790500 | -3.24578800 |
| H  | -2.13573400 | 2.01052800  | -0.78146200 |
| Pd | 0.34526700  | -0.18080100 | -0.69550700 |
| O  | -1.81323500 | 2.87480300  | -0.42728400 |
| C  | -2.74291600 | 3.89764700  | -0.79486900 |
| C  | -4.10946600 | 3.62219000  | -0.14166100 |
| H  | -4.00600700 | 3.57848800  | 0.94830000  |
| H  | -4.84051800 | 4.40190700  | -0.38929800 |
| H  | -4.51008000 | 2.66007500  | -0.48091300 |
| C  | -2.15479700 | 5.20756000  | -0.26010900 |
| H  | -1.17795300 | 5.39957500  | -0.71782800 |
| H  | -2.81253700 | 6.05646500  | -0.47956200 |
| H  | -2.01742600 | 5.14570500  | 0.82529300  |
| C  | -2.87731000 | 3.95440000  | -2.32677900 |
| H  | -3.55821400 | 4.75499400  | -2.64177600 |
| H  | -1.89751900 | 4.13285200  | -2.78345700 |
| H  | -3.26341100 | 3.00555600  | -2.71618100 |
| C  | 0.71020100  | 0.52357300  | -2.64396900 |
| H  | 0.40454800  | -0.24962000 | -3.35556900 |
| H  | 0.09142700  | 1.41441000  | -2.78879400 |
| H  | 1.76034100  | 0.77563100  | -2.82036700 |

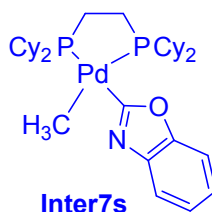

|   |             |             |             |
|---|-------------|-------------|-------------|
| P | -0.61765800 | 0.16693900  | 1.43845800  |
| P | 2.33672800  | 0.09962700  | 0.05010900  |
| C | 0.88311400  | 0.61049100  | 2.48320100  |
| C | -1.84776100 | 1.54103400  | 1.76978700  |
| C | -1.35754800 | -1.33637700 | 2.29245000  |
| C | 2.21026600  | 0.04940300  | 1.92902900  |
| C | 3.52523800  | -1.29024400 | -0.36834700 |
| C | 3.31698800  | 1.66683500  | -0.29361000 |
| H | 0.92389300  | 1.70467700  | 2.50003100  |
| H | 0.74342200  | 0.28735400  | 3.52217800  |
| C | -1.42313800 | 2.84655000  | 1.06414900  |
| C | -2.18386100 | 1.79423200  | 3.25373400  |
| H | -2.74776400 | 1.19363600  | 1.24541200  |
| C | -2.66464100 | -1.78739100 | 1.60284100  |
| C | -0.35678600 | -2.50961300 | 2.36165300  |
| H | -1.59321200 | -1.03662100 | 3.32478200  |
| H | 3.06170400  | 0.57216500  | 2.38278500  |
| H | 2.30833600  | -1.00514700 | 2.20773800  |
| C | 2.85560000  | -2.66956700 | -0.18746100 |
| C | 4.89164700  | -1.24228000 | 0.34626900  |
| H | 3.69770500  | -1.16065100 | -1.44652000 |
| C | 3.78398500  | 1.74380300  | -1.76385400 |
| C | 2.50300700  | 2.92586200  | 0.07588100  |
| H | 4.20678000  | 1.63388600  | 0.35361200  |
| C | -2.49782600 | 3.93482300  | 1.22481000  |
| H | -1.25555100 | 2.64202000  | 0.00220700  |
| H | -0.47657700 | 3.21630100  | 1.48716000  |
| C | -3.25360400 | 2.89132000  | 3.40479600  |
| H | -2.53644900 | 0.87617800  | 3.73886600  |
| H | -1.27583500 | 2.10593200  | 3.79152200  |
| C | -3.27469700 | -3.01677800 | 2.29709600  |
| H | -2.44955600 | -2.02793000 | 0.55379000  |
| H | -3.39640300 | -0.97196600 | 1.58862200  |
| C | -0.97119500 | -3.73958100 | 3.05186400  |
| H | -0.04785600 | -2.78075000 | 1.34271800  |
| H | 0.54992200  | -2.21015000 | 2.90211800  |
| C | 3.77881500  | -3.80463800 | -0.66247600 |
| H | 1.90543400  | -2.69225000 | -0.73371600 |
| H | 2.61594400  | -2.83044300 | 0.87386700  |
| C | 5.80865400  | -2.38484700 | -0.12768800 |
| H | 5.38901000  | -0.28005500 | 0.17524300  |

|    |             |             |             |   |             |             |             |
|----|-------------|-------------|-------------|---|-------------|-------------|-------------|
| H  | 4.74150600  | -1.32992900 | 1.43206100  | C | 4.09267100  | -3.05075800 | -0.65293200 |
| C  | 4.56767200  | 3.03811300  | -2.04247700 | H | 3.61737600  | -1.11366300 | -1.46406700 |
| H  | 2.90624600  | 1.69696000  | -2.42125200 | C | 3.98651400  | 0.58801200  | 0.91802500  |
| H  | 4.41127100  | 0.88064100  | -2.01602200 | C | 2.47500800  | -0.15515900 | 2.80984600  |
| C  | 3.28709800  | 4.21803400  | -0.21074700 | H | 3.89731500  | -1.39651600 | 1.77266600  |
| H  | 1.56859700  | 2.92675200  | -0.50120200 | H | -0.50801700 | -3.58118100 | 2.08095800  |
| H  | 2.21996900  | 2.90308800  | 1.13516800  | H | 0.11288300  | -2.09436800 | 2.78371300  |
| C  | -2.83889500 | 4.19015100  | 2.70002800  | C | -1.65401900 | 0.31429400  | 3.00304200  |
| H  | -3.40215000 | 3.61637900  | 0.68776300  | C | -2.96483000 | -1.85579700 | 3.26419900  |
| H  | -2.15932500 | 4.86228300  | 0.74527400  | H | -3.22144200 | -0.36952400 | 1.72279000  |
| H  | -4.19829600 | 2.53014900  | 2.97310900  | C | -3.60231200 | -2.04404100 | -0.65910100 |
| H  | -3.44625100 | 3.07593300  | 4.46977900  | C | -1.61527900 | -3.57515800 | -1.02789500 |
| C  | -2.27497300 | -4.17916100 | 2.37156500  | H | -2.80639500 | -3.46754400 | 0.76633300  |
| H  | -4.18093900 | -3.32576700 | 1.76165500  | C | 3.10051300  | -2.96204400 | -3.44850500 |
| H  | -3.59028400 | -2.74294000 | 3.31514500  | H | 1.51125700  | -1.73732300 | -2.60133400 |
| H  | -0.24375000 | -4.56166900 | 3.05457800  | H | 1.60507600  | -3.36537700 | -1.94337400 |
| H  | -1.17441500 | -3.49844800 | 4.10601300  | C | 4.97480200  | -3.50312800 | -1.83136000 |
| C  | 5.14304800  | -3.75772400 | 0.04155400  | H | 4.72808000  | -2.66518300 | 0.15332200  |
| H  | 3.92557600  | -3.71764500 | -1.74887000 | H | 3.56495000  | -3.92545100 | -0.24645900 |
| H  | 3.29242600  | -4.77310500 | -0.49061900 | C | 4.96566300  | 1.19138200  | 1.93984600  |
| H  | 6.05472000  | -2.22954500 | -1.18837600 | H | 3.27896800  | 1.36270300  | 0.58985600  |
| H  | 6.75836200  | -2.34902700 | 0.42135100  | H | 4.54039000  | 0.27056900  | 0.02622400  |
| C  | 3.75404300  | 4.28497000  | -1.67092500 | C | 3.45497100  | 0.45176400  | 3.82846900  |
| H  | 4.85712600  | 3.07024000  | -3.10032700 | H | 1.69939300  | 0.58268400  | 2.56079400  |
| H  | 5.50244200  | 3.02860400  | -1.46191200 | H | 1.96265700  | -1.00901000 | 3.26913100  |
| H  | 2.66236600  | 5.08675600  | 0.03267700  | C | -2.56194200 | 0.97627900  | 4.05355400  |
| H  | 4.16290600  | 4.26639500  | 0.45371000  | H | -1.31832300 | 1.06071500  | 2.27538800  |
| H  | -3.63784800 | 4.93796700  | 2.78426100  | H | -0.75813600 | -0.07983800 | 3.50643400  |
| H  | -1.95982600 | 4.61367800  | 3.20958100  | C | -3.86897800 | -1.17580000 | 4.30951800  |
| H  | -2.05181500 | -4.52965200 | 1.35332400  | H | -3.53294500 | -2.63225300 | 2.73732100  |
| H  | -2.71536400 | -5.02964100 | 2.90738100  | H | -2.14294200 | -2.36718000 | 3.78594500  |
| H  | 5.79953800  | -4.54712800 | -0.34559600 | C | -4.49298200 | -3.02091500 | -1.44645400 |
| H  | 5.00533500  | -3.96361500 | 1.11372800  | H | -3.21552000 | -1.27121900 | -1.33691600 |
| H  | 2.87637600  | 4.35489400  | -2.32968600 | H | -4.21059200 | -1.52442300 | 0.09037100  |
| H  | 4.34738400  | 5.19242500  | -1.83985100 | C | -2.51209000 | -4.54542400 | -1.81604700 |
| C  | -1.76265800 | -0.18100300 | -1.57693700 | H | -1.13258600 | -2.87613400 | -1.72549800 |
| O  | -2.14416600 | -1.24217700 | -2.41525000 | H | -0.81291500 | -4.14199400 | -0.53923800 |
| N  | -2.74520300 | 0.65843200  | -1.36375900 | C | 4.13235800  | -4.01154700 | -3.00993500 |
| C  | -3.45393400 | -1.00720800 | -2.73308200 | H | 3.62476000  | -2.08667700 | -3.85939100 |
| C  | -3.83763100 | 0.17541600  | -2.08617700 | H | 2.47245900  | -3.35727100 | -4.25695800 |
| C  | -4.30531700 | -1.75383900 | -3.53544300 | H | 5.59171600  | -2.65559700 | -2.16444900 |
| C  | -5.14065800 | 0.65765400  | -2.23791700 | H | 5.67153000  | -4.28194300 | -1.49499100 |
| C  | -5.60693100 | -1.26108400 | -3.67995500 | C | 4.24737700  | 1.62031600  | 3.22676700  |
| H  | -3.97770800 | -2.66553200 | -4.02548700 | H | 5.48769300  | 2.04530900  | 1.48987700  |
| C  | -6.01578600 | -0.07676100 | -3.04160300 | H | 5.73738800  | 0.44660500  | 2.18515200  |
| H  | -5.45436200 | 1.57459900  | -1.74697800 | H | 2.90320800  | 0.78083300  | 4.71823300  |
| H  | -6.31499400 | -1.80427000 | -4.30016100 | H | 4.15564500  | -0.32696600 | 4.16486500  |
| H  | -7.03537200 | 0.27369500  | -3.18023300 | C | -3.13289900 | -0.04728800 | 5.04496100  |
| Pd | 0.14268900  | -0.08703500 | -0.83517800 | H | -3.38868700 | 1.48672800  | 3.53907300  |
| C  | 0.79146400  | -0.33694100 | -2.81746700 | H | -2.00102200 | 1.75435600  | 4.58686800  |
| H  | 0.21685900  | -1.15588900 | -3.25626800 | H | -4.75395300 | -0.76177100 | 3.80433000  |
| H  | 0.57302500  | 0.58566100  | -3.36785900 | H | -4.23777400 | -1.92452300 | 5.02279400  |
| H  | 1.86092800  | -0.55787900 | -2.89748500 | C | -3.68613900 | -3.81559700 | -2.48169600 |

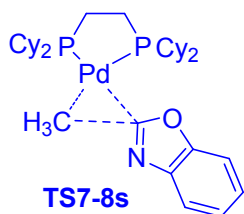

|   |             |             |             |
|---|-------------|-------------|-------------|
| P | 1.96114900  | -1.27693700 | 0.25931700  |
| P | -1.30054600 | -1.53348700 | 0.90095600  |
| C | 1.28161800  | -2.81847300 | 1.10478300  |
| C | 3.06317300  | -1.98958300 | -1.09373400 |
| C | 3.19024000  | -0.59361300 | 1.51353900  |
| C | -0.06557100 | -2.60825800 | 1.83264000  |
| C | -2.38515200 | -0.83059100 | 2.26764500  |
| C | -2.41371600 | -2.76505200 | 0.01509500  |
| H | 1.15698500  | -3.56533900 | 0.31344900  |
| H | 2.02051900  | -3.22844700 | 1.80507800  |
| C | 2.21496200  | -2.51213700 | -2.27420700 |

|    |             |            |             |
|----|-------------|------------|-------------|
| H  | -3.80075500 | 4.27027200 | 0.72440800  |
| H  | -6.28823600 | 3.19565700 | -2.64389700 |
| H  | -5.90614600 | 4.52121600 | -0.59654100 |
| Pd | -0.01925300 | 0.05365700 | -0.35144700 |
| C  | 0.44560300  | 1.86738500 | -1.63183800 |
| H  | -0.06954400 | 2.51777200 | -2.33842900 |
| H  | 1.00955400  | 2.47758700 | -0.92523500 |
| H  | 1.10429600  | 1.21887900 | -2.22267200 |

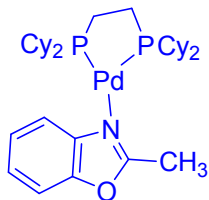

Inter8s

|   |             |             |             |
|---|-------------|-------------|-------------|
| P | -0.90768200 | 1.42120800  | 0.82143400  |
| P | 2.03079300  | -0.21538900 | 0.41947100  |
| C | 0.67170100  | 2.02606500  | 1.68268100  |
| C | -1.56061800 | 3.04768400  | 0.09090700  |
| C | -2.07218000 | 1.16925900  | 2.29681700  |
| C | 1.75726400  | 0.94783900  | 1.89298700  |
| C | 2.77404500  | -1.73012800 | 1.28873400  |
| C | 3.57062300  | 0.54501000  | -0.38592400 |
| H | 1.07375600  | 2.82014000  | 1.04278800  |
| H | 0.43203100  | 2.49705700  | 2.64538300  |
| C | -0.80124400 | 3.40096300  | -1.20479200 |
| C | -1.62173400 | 4.26970300  | 1.03039900  |
| H | -2.59055400 | 2.79906800  | -0.20629200 |
| C | -3.52324300 | 0.93563000  | 1.82775500  |
| C | -1.59661600 | -0.01228800 | 3.16738600  |
| H | -2.04834000 | 2.07787600  | 2.91767400  |
| H | 2.69964200  | 1.42835300  | 2.18811700  |
| H | 1.46627100  | 0.30199300  | 2.72938600  |
| C | 1.65733400  | -2.60661000 | 1.89258300  |
| C | 3.88104300  | -1.47312600 | 2.33251800  |
| H | 3.21752900  | -2.30697900 | 0.46315400  |
| C | 4.10136800  | -0.35392500 | -1.52117000 |
| C | 3.28110400  | 1.96200100  | -0.92236400 |
| H | 4.35194900  | 0.62878800  | 0.38505600  |
| C | -1.41106800 | 4.62611400  | -1.90707100 |
| H | -0.79900500 | 2.53273900  | -1.87517900 |
| H | 0.25204600  | 3.61554700  | -0.97118200 |
| C | -2.23134400 | 5.49664800  | 0.32590800  |
| H | -2.20365900 | 4.03944800  | 1.93120300  |
| H | -0.60749100 | 4.52335700  | 1.36983000  |
| C | -4.47645800 | 0.65026600  | 3.00182200  |
| H | -3.53881200 | 0.08599100  | 1.12955000  |
| H | -3.89003900 | 1.80322600  | 1.26608700  |
| C | -2.55235300 | -0.29815800 | 4.33887400  |
| H | -1.51313000 | -0.90775700 | 2.53446900  |
| H | -0.59199000 | 0.18497600  | 3.56058600  |
| C | 2.21241700  | -3.92322900 | 2.46170900  |
| H | 0.89615200  | -2.80595600 | 1.12849900  |
| H | 1.15031100  | -2.05622200 | 2.69936000  |
| C | 4.43667900  | -2.79220500 | 2.90234100  |
| H | 4.70126200  | -0.88871300 | 1.89719900  |
| H | 3.47445900  | -0.87340400 | 3.15909300  |
| C | 5.32073000  | 0.26008800  | -2.22999100 |
| H | 3.29399700  | -0.51197000 | -2.25145200 |
| H | 4.36593800  | -1.34614800 | -1.13617600 |
| C | 4.49965600  | 2.57546700  | -1.63443800 |
| H | 2.43465900  | 1.91228200  | -1.62260900 |
| H | 2.97049500  | 2.62251300  | -0.10400900 |
| C | -1.47999200 | 5.83972500  | -0.96826000 |
| H | -2.42608700 | 4.37653800  | -2.25089500 |
| H | -0.82900700 | 4.87181300  | -2.80529300 |
| H | -3.28510400 | 5.28822500  | 0.08777400  |
| H | -2.23071600 | 6.35760200  | 1.00769000  |
| C | -3.98932300 | -0.52990300 | 3.85303600  |

|    |             |             |             |
|----|-------------|-------------|-------------|
| H  | -5.48713900 | 0.45514600  | 2.61975600  |
| H  | -4.55025200 | 1.54648700  | 3.63590600  |
| H  | -2.19469800 | -1.16779200 | 4.90594900  |
| H  | -2.53939000 | 0.55450300  | 5.03429400  |
| C  | 3.32338600  | -3.67035800 | 3.49156200  |
| H  | 2.61452200  | -4.53030700 | 1.63674800  |
| H  | 1.40037500  | -4.50884900 | 2.91257900  |
| H  | 4.94622300  | -3.34474100 | 2.09871100  |
| H  | 5.19816400  | -2.57872000 | 3.66433900  |
| C  | 5.01670700  | 1.66830500  | -2.75881400 |
| H  | 5.64329000  | -0.39523800 | -3.04989900 |
| H  | 6.16290200  | 0.31311600  | -1.52378700 |
| H  | 4.23781400  | 3.56527000  | -2.03131000 |
| H  | 5.30454600  | 2.73666500  | -0.90162800 |
| H  | -1.95910600 | 6.68842600  | -1.47360300 |
| H  | -0.45771600 | 6.16140900  | -0.71810500 |
| H  | -4.02414900 | -1.44973500 | 3.25013200  |
| H  | -4.66111000 | -0.68943500 | 4.70648000  |
| H  | 3.73833600  | -4.62170500 | 3.84935600  |
| H  | 2.89316400  | -3.16674000 | 4.37042300  |
| H  | 4.25450900  | 1.60100000  | -3.54970400 |
| H  | 5.91083700  | 2.10498100  | -3.22247600 |
| C  | -1.01657300 | -1.50106400 | -3.42297700 |
| O  | -1.90997800 | -2.26978600 | -4.12953200 |
| N  | -1.16553500 | -1.54640600 | -2.13029900 |
| C  | -2.69489800 | -2.86012700 | -3.16728000 |
| C  | -2.24236100 | -2.41706900 | -1.92033300 |
| C  | -3.75303800 | -3.74105700 | -3.33397500 |
| C  | -2.86132200 | -2.85938400 | -0.75067500 |
| C  | -4.36706800 | -4.17931900 | -2.15741000 |
| H  | -4.08124700 | -4.06677900 | -4.31522200 |
| C  | -3.92919600 | -3.74637400 | -0.89190400 |
| H  | -2.51541500 | -2.51640000 | 0.21897200  |
| H  | -5.20246300 | -4.87042800 | -2.22308300 |
| H  | -4.43759500 | -4.11322800 | -0.00478500 |
| Pd | -0.09399100 | -0.31249200 | -0.55042800 |
| C  | -0.02201900 | -0.71966500 | -4.19817100 |
| H  | -0.46665700 | 0.20442400  | -4.58907600 |
| H  | 0.80302800  | -0.45089500 | -3.53312800 |
| H  | 0.34966400  | -1.30104300 | -5.04798500 |

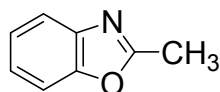

P2

|   |             |             |             |
|---|-------------|-------------|-------------|
| C | -1.84444200 | 0.10497500  | 0.00014900  |
| O | -1.12523700 | -1.07342700 | -0.00016500 |
| N | -1.13605600 | 1.18776200  | 0.00013100  |
| C | 0.18647100  | -0.66360100 | 0.00001500  |
| C | 0.18810300  | 0.73753000  | -0.00005100 |
| C | 1.33666700  | -1.43773400 | 0.00007000  |
| C | 1.39960900  | 1.43203000  | -0.00011100 |
| C | 2.54227900  | -0.73061800 | 0.00005700  |
| H | 1.30160200  | -2.52200800 | 0.00008400  |
| C | 2.57204000  | 0.67581000  | -0.00001800 |
| H | 1.41807600  | 2.51716200  | -0.00007500 |
| H | 3.47820900  | -1.28194600 | 0.00006300  |
| H | 3.53298600  | 1.18247000  | -0.00002200 |
| C | -3.32542500 | -0.02547100 | -0.00000900 |
| H | -3.66856700 | -0.57631200 | 0.88317600  |
| H | -3.77143500 | 0.97021200  | 0.00126100  |
| H | -3.66839000 | -0.57401800 | -0.88470500 |

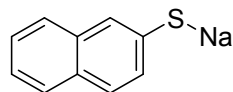

|    |             |             |             |
|----|-------------|-------------|-------------|
| Na | 2.85647600  | 0.02549100  | 1.37485700  |
| S  | 2.08168700  | -1.39933100 | -0.57027200 |
| C  | 0.93095000  | -0.04381700 | -0.42290800 |
| C  | -0.48092800 | -0.25861200 | -0.17301400 |
| C  | 1.36991000  | 1.28453600  | -0.51217900 |

|   |             |             |             |
|---|-------------|-------------|-------------|
| C | -1.03736900 | -1.56141500 | -0.08487200 |
| C | -1.35659500 | 0.86828600  | -0.00921200 |
| C | 0.49845900  | 2.38818400  | -0.34086100 |
| H | 2.40481700  | 1.46919100  | -0.80319100 |
| C | -2.38297100 | -1.75107500 | 0.14769100  |
| H | -0.36913100 | -2.40628600 | -0.21271100 |
| C | -2.73764700 | 0.63717900  | 0.23309700  |
| C | -0.83775900 | 2.19073400  | -0.08779600 |
| H | 0.89673200  | 3.39645400  | -0.43170500 |
| C | -3.24336500 | -0.64102400 | 0.30930900  |
| H | -2.78625300 | -2.75876400 | 0.20568900  |
| H | -3.39311000 | 1.49685400  | 0.35494200  |
| H | -1.51415200 | 3.03228500  | 0.03953500  |
| H | -4.30323600 | -0.79869800 | 0.49283500  |

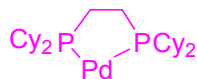

cat\_dist

|    |             |             |             |
|----|-------------|-------------|-------------|
| Pd | -0.44958400 | 0.54076500  | -0.96027000 |
| P  | -2.47624300 | 0.03476700  | 0.35772300  |
| P  | 0.76181400  | 0.41669700  | 1.13345400  |
| C  | -1.86868600 | -0.34755600 | 2.10037900  |
| C  | -0.55196100 | 0.36015700  | 2.48450200  |
| C  | -3.73484600 | 1.41690500  | 0.60158000  |
| C  | -3.07360100 | 2.67860000  | 1.19686400  |
| C  | -4.07137100 | 3.84179600  | 1.33200800  |
| C  | -4.74395900 | 4.16860900  | -0.00790600 |
| C  | -5.41423900 | 2.92232800  | -0.60148800 |
| C  | -4.42193800 | 1.75492700  | -0.74037100 |
| C  | -3.56737500 | -1.45967700 | -0.02988500 |
| C  | -2.70875100 | -2.68421700 | -0.41172100 |
| C  | -3.57845700 | -3.86616400 | -0.87143600 |
| C  | -4.62801000 | -4.24152500 | 0.18521100  |
| C  | -5.48326500 | -3.02696800 | 0.57308800  |
| C  | -4.61428400 | -1.84336900 | 1.03710800  |
| C  | 1.87191400  | 1.78805700  | 1.81371100  |
| C  | 1.22400200  | 3.17318300  | 1.59744200  |
| C  | 2.10144400  | 4.30667600  | 2.15665500  |
| C  | 3.51035300  | 4.27751400  | 1.54757400  |
| C  | 4.16321900  | 2.90240300  | 1.73907300  |
| C  | 3.28272400  | 1.76739300  | 1.18626900  |
| C  | 1.79936100  | -1.13799000 | 1.38128400  |
| C  | 1.07132400  | -2.39876000 | 0.86990600  |
| C  | 1.99638100  | -3.62715700 | 0.89747800  |
| C  | 2.58109600  | -3.86623900 | 2.29724600  |
| C  | 3.28527300  | -2.60957300 | 2.82929200  |
| C  | 2.35837300  | -1.37983100 | 2.79822200  |
| H  | -2.64426700 | -0.11360000 | 2.84112600  |
| H  | -1.72468000 | -1.43330000 | 2.13758200  |
| H  | -0.14617900 | -0.08532600 | 3.40122500  |
| H  | -0.75995800 | 1.40893700  | 2.72053400  |
| H  | -4.50142200 | 1.07119900  | 1.31207900  |
| H  | -2.23926500 | 2.98600600  | 0.55089700  |
| H  | -2.64624400 | 2.45465200  | 2.18195900  |
| H  | -3.55444600 | 4.72579900  | 1.72721400  |
| H  | -4.84261700 | 3.57469900  | 2.07009600  |
| H  | -3.98623100 | 4.54261700  | -0.71180400 |
| H  | -5.47906000 | 4.97346900  | 0.12012600  |
| H  | -5.84996000 | 3.15286600  | -1.58204500 |
| H  | -6.24873200 | 2.61569000  | 0.04716000  |
| H  | -3.65043800 | 2.01327100  | -1.47943500 |
| H  | -4.95001700 | 0.87709800  | -1.13294900 |
| H  | -4.10865700 | -1.15357600 | -0.93757300 |
| H  | -2.10884600 | -3.00073400 | 0.45400400  |
| H  | -1.99550900 | -2.40693900 | -1.19733800 |
| H  | -2.94130800 | -4.72992100 | -1.10092300 |
| H  | -4.08769100 | -3.59585900 | -1.80845800 |
| H  | -4.11739600 | -4.62468700 | 1.08144500  |
| H  | -5.26650500 | -5.05497300 | -0.18217000 |
| H  | -6.19499700 | -3.29753000 | 1.36386200  |
| H  | -6.08401200 | -2.71439700 | -0.29382200 |

|   |             |             |             |
|---|-------------|-------------|-------------|
| H | -4.10294100 | -2.12135400 | 1.96979400  |
| H | -5.25792900 | -0.98828900 | 1.27564700  |
| H | 1.97153000  | 1.62177700  | 2.89807400  |
| H | 0.23056700  | 3.21783700  | 2.06111100  |
| H | 1.07435900  | 3.32487500  | 0.52071600  |
| H | 2.17299600  | 4.20746900  | 3.25043100  |
| H | 1.62033600  | 5.27423800  | 1.96235200  |
| H | 4.13527100  | 5.06235400  | 1.99329300  |
| H | 3.44365800  | 4.49444800  | 0.47260800  |
| H | 4.34435600  | 2.73126400  | 2.81128800  |
| H | 5.14393600  | 2.87533900  | 1.24753500  |
| H | 3.77840500  | 0.80847400  | 1.37413500  |
| H | 3.19570400  | 1.86951300  | 0.09734200  |
| H | 2.64812500  | -0.97065500 | 0.70201500  |
| H | 0.69963700  | -2.22394500 | -0.14539000 |
| H | 0.19441300  | -2.60019800 | 1.50263100  |
| H | 2.81591700  | -3.47103400 | 0.18105100  |
| H | 1.44808500  | -4.51516300 | 0.55673100  |
| H | 3.27859300  | -4.71350400 | 2.28041200  |
| H | 1.76902600  | -4.14425500 | 2.98615000  |
| H | 4.17369600  | -2.40329400 | 2.21456100  |
| H | 3.64599300  | -2.77812800 | 3.85240300  |
| H | 2.90231600  | -0.50081000 | 3.16319800  |
| H | 1.52666700  | -1.54682600 | 3.49785200  |

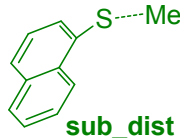

sub\_dist

|   |             |             |             |
|---|-------------|-------------|-------------|
| S | -0.82894000 | 1.28822700  | -3.23623500 |
| C | -1.53699400 | -0.11275200 | -4.17303700 |
| H | -2.24486600 | -0.69390100 | -3.57673000 |
| H | -2.04952100 | 0.30876500  | -5.04300200 |
| H | -0.72779000 | -0.76364800 | -4.52221400 |
| C | 0.99851000  | 0.56740200  | -2.55256800 |
| C | 2.06835000  | 1.54703200  | -2.62374400 |
| C | 1.30030800  | -0.76966300 | -2.85523800 |
| C | 1.84585500  | 2.92573300  | -2.39658000 |
| C | 3.39824300  | 1.11345100  | -2.94273700 |
| C | 2.62223900  | -1.17375300 | -3.14662100 |
| H | 0.51490500  | -1.51968400 | -2.83710400 |
| C | 2.87143600  | 3.84982000  | -2.47857400 |
| H | 0.83909100  | 3.25716600  | -2.15715000 |
| C | 4.43346100  | 2.08483100  | -3.00691800 |
| C | 3.65683400  | -0.26590000 | -3.19168400 |
| H | 2.81474200  | -2.22684100 | -3.34344300 |
| C | 4.18223800  | 3.42257100  | -2.78377600 |
| H | 2.66817700  | 4.90462000  | -2.31231600 |
| H | 5.44032500  | 1.74976100  | -3.24794100 |
| H | 4.66871500  | -0.57925700 | -3.43497800 |
| H | 4.98936300  | 4.14811600  | -2.84753400 |

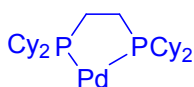

cat\_dist

|    |             |             |             |
|----|-------------|-------------|-------------|
| Pd | -0.23910400 | 0.18957500  | -0.97941500 |
| P  | -2.33811800 | -0.26760000 | 0.18508900  |
| P  | 0.87427300  | 0.23986900  | 1.15891000  |
| C  | -1.82107000 | -0.42776900 | 1.99611000  |
| C  | -0.55239200 | 0.36082400  | 2.38886900  |
| C  | -3.67589800 | 1.06154400  | 0.23691000  |
| C  | -3.06984500 | 2.43320500  | 0.60537100  |
| C  | -4.12287100 | 3.55457300  | 0.58345500  |
| C  | -4.83861800 | 3.63110900  | -0.77167900 |
| C  | -5.45777100 | 2.27600300  | -1.13850000 |
| C  | -4.41120300 | 1.14856500  | -1.11856900 |
| C  | -3.33519000 | -1.85495000 | -0.07391800 |

|   |             |             |             |   |             |             |             |
|---|-------------|-------------|-------------|---|-------------|-------------|-------------|
| C | -2.40039800 | -3.07439300 | -0.22012400 | C | -2.02370900 | 1.26297300  | -5.29894200 |
| C | -3.18206800 | -4.34421500 | -0.59574000 | C | -1.88013500 | -0.79102800 | -3.98436700 |
| C | -4.30178700 | -4.63706900 | 0.41366000  | C | -1.67983500 | 2.61362900  | -5.57715300 |
| C | -5.23214600 | -3.42611500 | 0.57723200  | C | -2.95036800 | 0.60505000  | -6.17748600 |
| C | -4.45067000 | -2.15215600 | 0.94962300  | C | -2.77706700 | -1.42994600 | -4.86999600 |
| C | 1.90122700  | 1.75318300  | 1.64214200  | H | -1.48319600 | -1.33288600 | -3.13092400 |
| C | 1.19422800  | 3.05800500  | 1.21487400  | C | -2.21920800 | 3.28273100  | -6.65483100 |
| C | 2.03457800  | 4.30394600  | 1.54476000  | H | -0.97393600 | 3.12024000  | -4.92723900 |
| C | 3.43162900  | 4.22638000  | 0.91442500  | C | -3.48977600 | 1.32649300  | -7.27699000 |
| C | 4.14806900  | 2.93541300  | 1.33094600  | C | -3.30862700 | -0.74999300 | -5.94066000 |
| C | 3.30746200  | 1.68836100  | 1.00667000  | H | -3.04769600 | -2.46794500 | -4.69139400 |
| C | 1.92203100  | -1.20010700 | 1.80457900  | C | -3.13743000 | 2.63577800  | -7.51400200 |
| C | 1.20605100  | -2.55109300 | 1.59163200  | H | -1.93601500 | 4.31435200  | -6.84673300 |
| C | 2.11667700  | -3.73842900 | 1.94648700  | H | -4.19208300 | 0.81759100  | -7.93362400 |
| C | 2.64588200  | -3.63107900 | 3.38397600  | H | -4.00393000 | -1.23593600 | -6.62081600 |
| C | 3.34781500  | -2.28568000 | 3.61695400  | H | -3.55950000 | 3.17229000  | -8.35975800 |
| C | 2.44120100  | -1.09463700 | 3.25345300  | C | 1.25478100  | -0.17298500 | -2.78949400 |
| H | -2.64737200 | -0.14257500 | 2.66032700  | H | 1.06799200  | -0.57463800 | -3.78395000 |
| H | -1.64509100 | -1.49664000 | 2.16128500  | H | 2.13006400  | 0.47194900  | -2.76299800 |
| H | -0.22686900 | 0.05643500  | 3.39160500  | H | 1.34696900  | -1.00851300 | -2.07832100 |
| H | -0.79351100 | 1.42657200  | 2.45607600  |   |             |             |             |
| H | -4.40507900 | 0.79105300  | 1.01639600  |   |             |             |             |
| H | -2.26775800 | 2.66903900  | -0.10723600 |   |             |             |             |
| H | -2.60801100 | 2.38985700  | 1.59959900  |   |             |             |             |
| H | -3.64366400 | 4.51393100  | 0.81862600  |   |             |             |             |
| H | -4.86506400 | 3.37352800  | 1.37573100  |   |             |             |             |
| H | -4.11566500 | 3.92123500  | -1.54783500 |   |             |             |             |
| H | -5.61023400 | 4.41157300  | -0.75226500 |   |             |             |             |
| H | -5.92581600 | 2.32442200  | -2.12989100 |   |             |             |             |
| H | -6.26079400 | 2.04030100  | -0.42362900 |   |             |             |             |
| H | -3.67422500 | 1.31957100  | -1.91500900 |   |             |             |             |
| H | -4.90431700 | 0.19693700  | -1.35037300 |   |             |             |             |
| H | -3.80707400 | -1.69834000 | -1.05509200 |   |             |             |             |
| H | -1.87170200 | -3.25223500 | 0.72777600  |   |             |             |             |
| H | -1.62806400 | -2.86471700 | -0.97032100 |   |             |             |             |
| H | -2.49646900 | -5.19882400 | -0.66395700 |   |             |             |             |
| H | -3.62085800 | -4.21401700 | -1.59612500 |   |             |             |             |
| H | -3.85434000 | -4.88365600 | 1.38838500  |   |             |             |             |
| H | -4.87646500 | -5.51883900 | 0.10239200  |   |             |             |             |
| H | -5.99555100 | -3.63080600 | 1.33930900  |   |             |             |             |
| H | -5.77113200 | -3.25348800 | -0.36599500 |   |             |             |             |
| H | -4.00826000 | -2.28513200 | 1.94731600  |   |             |             |             |
| H | -5.14409000 | -1.30611200 | 1.02420900  |   |             |             |             |
| H | 2.01153900  | 1.76422200  | 2.73719200  |   |             |             |             |
| H | 0.21366800  | 3.14409800  | 1.69793400  |   |             |             |             |
| H | 1.00203300  | 3.01825000  | 0.13359000  |   |             |             |             |
| H | 2.13436600  | 4.39890500  | 2.63652700  |   |             |             |             |
| H | 1.50889500  | 5.20361100  | 1.19984200  |   |             |             |             |
| H | 4.02874500  | 5.10294200  | 1.19698700  |   |             |             |             |
| H | 3.33638700  | 4.25056400  | -0.18108900 |   |             |             |             |
| H | 4.34959000  | 2.96425000  | 2.41229200  |   |             |             |             |
| H | 5.12423700  | 2.86135300  | 0.83422800  |   |             |             |             |
| H | 3.84635100  | 0.79447300  | 1.34169100  |   |             |             |             |
| H | 3.19705000  | 1.59889300  | -0.08395700 |   |             |             |             |
| H | 2.79447900  | -1.19364500 | 1.13343700  |   |             |             |             |
| H | 0.85506700  | -2.63249000 | 0.55628000  |   |             |             |             |
| H | 0.31151500  | -2.59338400 | 2.22984900  |   |             |             |             |
| H | 2.96522500  | -3.76472900 | 1.24680200  |   |             |             |             |
| H | 1.57058600  | -4.68085800 | 1.81002500  |   |             |             |             |
| H | 3.33090400  | -4.46020000 | 3.60256000  |   |             |             |             |
| H | 1.80467400  | -3.72688900 | 4.08692800  |   |             |             |             |
| H | 4.25950800  | -2.24274400 | 3.00279000  |   |             |             |             |
| H | 3.67265100  | -2.19998700 | 4.66211200  |   |             |             |             |
| H | 2.99273000  | -0.15946100 | 3.40361500  |   |             |             |             |
| H | 1.58987700  | -1.07023900 | 3.94901600  |   |             |             |             |

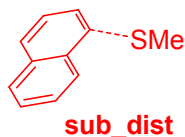

|   |             |            |             |
|---|-------------|------------|-------------|
| S | -0.34440300 | 1.32219600 | -3.07679200 |
| C | -1.49893400 | 0.52999000 | -4.17336400 |
